1 Ciliary Genes *arl13b*, *ahi1* and *cc2d2a* Differentially Modify Expression of Visual Acuity  
2 Phenotypes but do not Enhance Retinal Degeneration due to Mutation of *cep290* in Zebrafish

3

4 *Short title: Retinal degeneration in cep290 mutant zebrafish*

5

6

7 Emma M. Lessieur<sup>1,2,4</sup>, Ping Song<sup>1,4</sup>, Gabrielle C. Nivar<sup>1</sup>,

8 Ellen M. Piccillo<sup>1</sup>, Joseph Fogerty<sup>1</sup>, Richard Rozic<sup>3</sup>, and Brian D. Perkins<sup>1,2</sup>

9

10 <sup>1</sup>Department of Ophthalmic Research, Cole Eye Institute,

11 Cleveland Clinic, Cleveland, OH 44195 United States

12 <sup>2</sup>Department of Molecular Medicine, Cleveland Clinic Lerner College of Medicine,

13 Case Western Reserve University, Cleveland, OH 44195 United States

14 <sup>3</sup>Department of Biomedical Engineering, Lerner Research Institute,

15 Cleveland Clinic, Cleveland, OH 44195 United States

16

17 <sup>4</sup>*These authors contributed equally to this work*

18 *Correspondence to:*

19 *Brian D. Perkins, Ph.D.*

20 *Department of Ophthalmic Research*

21 *Cleveland Clinic*

22 *9500 Euclid Ave*

23 *Building i3-156*

24 *Cleveland, OH 44195, USA*

25 *(Ph) 216-444-9683*

26 *(Fax) 216-445-3670*

27 [perkinb2@ccf.org](mailto:perkinb2@ccf.org)

28

29

30 **Nonstandard abbreviations**

31

32 BBS – Bardet-Biedl Syndrome

33

34 COS – cone outer segments

35

36 Dpf - Days post fertilization

37

38 GNB1 – rod transducin  $\beta$  subunit

39

40 GRK1 – rhodopsin kinase

41

42 JTBS – Joubert Syndrome

43

44 LCA – Leber Congenital Amaurosis

45

46 MKS – Meckel Syndrome

47

48 NPHP – nephronophthisis

49

50 OKR – optokinetic response

51

52 PNA – peanut agglutinin lectin

53

54 ROS – rod outer segments

55

56 RP2 – Retinitis Pigmentosa 2

57 **ABSTRACT**

58  
59 Mutations in the gene Centrosomal Protein 290 kDa (*CEP290*) result in multiple ciliopathies  
60 ranging from the neonatal lethal disorder Meckel-Gruber Syndrome to multi-systemic disorders  
61 such as Joubert Syndrome and Bardet-Biedl Syndrome to nonsyndromic diseases like Leber  
62 Congenital Amaurosis (LCA) and retinitis pigmentosa. Results from model organisms and  
63 human genetics studies, have suggest that mutations in genes encoding protein components of  
64 the transition zone (TZ) and other cilia-associated proteins can function as genetic modifiers  
65 and be a source for *CEP290* pleiotropy. We investigated the zebrafish *cep290<sup>fh297/fh297</sup>* mutant,  
66 which encodes a nonsense mutation (p.Q1217\*). This mutant is viable as adults, exhibits  
67 scoliosis, and undergoes a slow, progressive cone degeneration. The *cep290<sup>fh297/fh297</sup>* mutants  
68 showed partial mislocalization of the transmembrane protein rhodopsin but not of the prenylated  
69 proteins rhodopsin kinase (GRK1) or the rod transducin subunit GNB1. Surprisingly,  
70 photoreceptor degeneration did not trigger proliferation of Müller glia, but proliferation of rod  
71 progenitors in the outer nuclear layer was significantly increased. To determine if heterozygous  
72 mutations in other cilia genes could exacerbate retinal degeneration, we bred *cep290<sup>fh297/fh297</sup>*  
73 mutants to *arl13b*, *ahi1*, and *cc2d2a* mutant zebrafish lines. While *cep290<sup>fh297/fh297</sup>* mutants  
74 lacking a single allele of these genes did not exhibit accelerated photoreceptor degeneration,  
75 loss of one alleles of *arl13b* or *ahi1* reduced visual performance in optokinetic response assays  
76 at 5 days post fertilization. Our results indicate that the *cep290<sup>fh297/fh297</sup>* mutant is a useful model  
77 to study the role of genetic modifiers on photoreceptor degeneration in zebrafish and to explore  
78 how progressive photoreceptor degeneration influences regeneration in adult zebrafish.

79

80

81 Keywords: cilia, photoreceptor, Leber Congenital Amaurosis, rhodopsin

82

83

84

## 85 INTRODUCTION

86 Ciliopathies refer to a group of recessive disorders stemming from defects in the  
87 biogenesis, structure or function of cilia [1]. These disorders exhibit both clinical and genetic  
88 heterogeneity [2], with mutations in dozens of genes resulting in a spectrum of diseases sharing  
89 overlapping symptoms. Clinically, ciliopathies can manifest as non-syndromic disorders, such  
90 as in Leber Congenital Amaurosis (LCA; OMIM: 204000), which is an inherited form of  
91 childhood retinal dystrophy, to more pleiotropic diseases, such as Joubert Syndrome (JBTS;  
92 OMIM 213300), Meckel Syndrome (MKS; OMIM 249000), Bardet-Biedl Syndrome (BBS; OMIM  
93 209900), and Nephronophthisis (NPHP; OMIM 256100), each of which impact unique  
94 combinations of organ systems [3].

95 Mutations in the gene for Centrosomal Protein 290 (*CEP290*) cause JBTS, MKS, BBS,  
96 and NPHP [3], but also account for 15-25% of cases of isolated blindness in LCA with no  
97 associated systemic disease [4, 5]. Most *CEP290* lesions in humans are stop codons that result  
98 from frameshift and nonsense mutations occurring throughout the gene, whereas pathogenic  
99 missense mutations are rare [6]. Despite the identification of more than 130 mutations in  
100 human *CEP290*, efforts to establish obvious genotype-phenotype correlations have been  
101 unsuccessful [6]. *CEP290* mutations are strongly associated with retinal dystrophy and  
102 photoreceptor degeneration is one of the most common symptoms of ciliopathies [7]. The most  
103 frequent *CEP290* mutation in LCA is a deep intronic mutation (c.2991+1655 A>G) that activates  
104 a cryptic splice site and creates a stop codon, resulting in early termination of the protein [4]. In  
105 a recent study of LCA patients with *CEP290* mutations, visual acuity varied considerably  
106 although most patients had significant vision loss and undetectable electroretinograms (ERGs)  
107 regardless of genotype [8]. In spite of the severe loss of vision, multiple studies have reported  
108 that cone photoreceptors persist within the central retina of *CEP290*-LCA patients [8-11],  
109 suggesting that a window of opportunity may exist for therapeutic intervention.

110 In humans, *CEP290* encodes a 2479 amino acid protein (~290 kDa) that can localize to  
111 the basal body [12] and/or the transition zone (TZ) of cilia [13, 14] in a tissue-specific manner.  
112 The TZ refers to the most proximal region of the ciliary axoneme, immediately distal to the basal  
113 body. The connecting cilium in vertebrate photoreceptors is homologous to the TZ of a  
114 prototypic primary cilium [15]. The TZ is believed to function as a ciliary gate that regulates  
115 protein entry and exit to the cilium. Defects in the ciliary gate may result in abnormal  
116 accumulation of non-outer segment proteins within the outer segment [16] and/or disrupt normal  
117 protein delivery to the outer segment. Work from *C. elegans* have proposed roles for Cep290  
118 ranging from cell adhesion to TZ assembly [13, 17, 18], but *in vivo* studies in vertebrate models  
119 have not fully elucidated a role for Cep290 or explained the variability in photoreceptor  
120 phenotypes [14, 19-21]. Abyssinian cats exhibit a high degree of inherited retinal degeneration  
121 due to the *rdAc* allele in the feline *Cep290* gene and this *rdAc* allele can also be found at  
122 elevated frequencies in several other cat breeds [22, 23]. In rodents, the *rd16* allele reflects an  
123 in-frame deletion of *Cep290* that leads to rapid photoreceptor degeneration [20]. Although a  
124 targeted gene knockout of *Cep290* causes embryonic lethality in mice [14], truncating nonsense  
125 mutations in humans can often result in attenuated pathologies that range from multisystem  
126 dysfunction to mild retinal disease. Indeed, LCA patients with two truncating *CEP290* mutations  
127 can sometimes maintain photoreceptor architecture and retain limited visual acuity [8, 9, 24].  
128 These unexpectedly mild phenotypes have recently been attributed to basal exon skipping and  
129 nonsense-mediated alternative splicing of the *CEP290* mRNA [24, 25]. Nevertheless, patients  
130 with identical genotypes can still exhibit very different retinal phenotypes [9].

131 One hypothesis to explain the variable phenotypic expression is the effects of mutations  
132 in second-site modifiers [26-29]. Genetic [26-28] and biochemical studies [18, 30] in *C. elegans*  
133 and cultured mammalian cells have identified two molecular complexes within the TZ, termed  
134 the NPHP and MKS modules. The proteins Cc2d2a, Ahi1, Mks1, and at least 5 other proteins  
135 form the MKS module [28], while the NPHP module consists of Nphp1 and Nphp4 [31], although

136 proteomic studies suggest additional factors likely exist [30]. Homozygous mutations in genes  
137 from both an MKS and NPHP module severely disrupt cilia formation [27, 28, 31, 32]. These  
138 genetic interactions, however, reflect phenotypes resulting from double homozygous mutants.  
139 In humans, the frequency of pathogenic alleles in cilia genes is low and a more realistic  
140 scenario is that heterozygous mutant alleles in one cilia gene may influence phenotypic  
141 expression resulting from homozygous mutations in *CEP290*. Heterozygous missense alleles of  
142 the *AHI1* gene were identified in LCA patients with severe neurological involvement, suggesting  
143 that alleles of *AHI1* may influence phenotypic expression [33]. In zebrafish, morpholino  
144 suppression of *cep290* resulted in a genetic interaction with *cc2d2a* and synergistically  
145 enhanced kidney cyst phenotypes [12]. Finally, the small GTPase Arl13b localizes to cilia and  
146 is essential for photoreceptor survival [34, 35]. The *C. elegans* homolog *arl-13* genetically  
147 interacts with *nphp-2* to regulate ciliogenesis and Arl13b was reported to regulate cilia length  
148 [36]. Genetic interactions between *ARL13B* and other ciliary components have not been  
149 investigated; however, protein complexes containing Cep290 show similar localization patterns  
150 with Arl13b to the basal body and TZ domains.

151 In this study, we evaluated the zebrafish *cep290<sup>fh297/fh297</sup>* mutant in an effort to test *ahi1*,  
152 *cc2d2a*, and *arl13b* as potential genetic modifiers of retinal degeneration. We report that the  
153 *cep290<sup>fh297/fh297</sup>* mutant shows progressive and predominant cone degeneration. We found that  
154 the phenotype observed in these mutants was not the consequence of nonsense-associated  
155 alternative-splicing, a phenomenon hypothesized to explain phenotypic variation in humans [37].  
156 We report that heterozygous mutations in *ahi1* and *arl13b*, were associated with decreased  
157 visual acuity, whereas the absence of one allele of *cc2d2a* had no effect on visual acuity.  
158 Retinal degeneration in the *cep290<sup>fh297/fh297</sup>* mutant was not exacerbated by heterozygosity of  
159 any of these genes. Furthermore, the mild phenotypes observed in *cep290<sup>fh297/fh297</sup>* mutants was  
160 not due to retinal regeneration. These data demonstrate a role for Cep290 in cone survival in

161 zebrafish and provide a foundation for future analysis of potential modifier genes of *cep290*-

162 associated retinal degeneration.

163

164

165 **MATERIAL AND METHODS**

166

167 **Zebrafish husbandry**

168 Adult zebrafish were maintained and raised on an Aquatic Habitats recirculating water  
169 system (Pentair; Apopka, FL, USA) in a 14:10 hr light-dark cycle. The Cleveland Clinic  
170 Institutional Animal Care and Use Committee (IACUC) approved all experimental procedures  
171 (Protocol number: 2018-1980). The *cep290<sup>fh297/fh297</sup>* mutant was identified by the zebrafish  
172 TILLING consortium and was a gift of Dr. Cecilia Moens (Fred Hutchinson Cancer Center,  
173 Seattle, WA. USA).

174

175 **Sequencing**

176 Using sequence data from Ensembl ([http://useast.ensembl.org/Danio\\_erio/Info/Index](http://useast.ensembl.org/Danio_erio/Info/Index);  
177 transcript: *cep290-202*), primers were designed to span exon 29 (5'-  
178 GTCTGATGAAAAGGCCCTGA-3' and 5'-CCTCCAAGCCTTTCAGCTTT-3') for the *cep290<sup>fh297</sup>*  
179 allele. Samples were sequenced at the Genomics Core of the Cleveland Clinic Lerner Research  
180 Institute using the high-throughput, 96-capillary *ABI 3730x/DNA Analyzer*.

181

182 **Genotyping**

183 *cDNA extraction*: Tail-clips from embryos or adults were placed in 0.5 ml individual tubes and 25  
184  $\mu$ L (embryos) or 50  $\mu$ L (adults) of lysis buffer (50mM Tris pH 8.5, 5mM EDTA, 100mM NaCl,  
185 0.4% SDS, 100  $\mu$ g/mL proteinase K) was added to each tube and then incubated at 60 °C for 4  
186 hrs (embryos) to overnight (adults). Samples were then diluted 1:10 in nuclease-free water and  
187 heat inactivated at 95 °C for 5 min.

188

189 *PCR and High Resolution Melt Analysis (HRMA)*: HRMA primers targeting *cep290* exon 29 for  
190 the *cep290<sup>fh297</sup>* allele (5' - ACAAACACACGTCTGCAGAACTGGACGCG – 3' and 5' -



191 CTGCTGTTGCTCATCCAG TT – 3') were designed flanking the point mutation. PCR products  
192 were 95 bp. High-resolution melt curve analysis was performed using Bio-Rad Precision Melt  
193 reagent in 8µl reactions with a CFX96 Touch™ Real-Time PCR Detection System (Bio-Rad,  
194 Hercules, CA, USA) at standard cycling conditions. Melt curves were analyzed using the  
195 Precision Melt Analysis Software version 1.2 (Bio-Rad, Hercules, CA, USA).

196

### 197 **Micro-computed tomography (µCT)**

198 Adult zebrafish were euthanized and fixed in 4% paraformaldehyde (in 1X PBS)  
199 overnight at 4 °C. Specimens were washed in 1X PBS and immersed in 70% ethanol in a 15  
200 mL conical tube. Samples were scanned with an Explore Locus RS (GE Medical Systems,  
201 London, Ontario, Canada) at 45 µm. Images were analyzed and reconstructed using MicroView  
202 software version 2.5.0-3768 (Parallax Innovations Inc.; Ilderton, Ontario, Canada).

203

### 204 **Light and electron microscopy**

205 Light-adapted larvae were bisected through the swim bladder, and heads were prepared  
206 for transmission electron microscopy. Tails were used for genomic DNA extraction and  
207 genotyping as described above. For adult animals, enucleations were performed at the  
208 designated time points and samples prepared for transmission electron microscopy. Briefly, the  
209 eyes were enucleated from light-adapted animals and the anterior segment was dissected away  
210 in primary fixative (0.08M cacodylate buffer containing 2% paraformaldehyde and 2%  
211 glutaraldehyde). The tissue was fixed for 1 hr at room temperature in primary fixative and then  
212 washed with cacodylate buffer and post-fixed in 1% osmium tetroxide for 1 hr at 4 °C. Samples  
213 were washed again and then dehydrated in a graded methanol series before embedding them  
214 in Embed-812/DER736 (Electron Microscopy Sciences; Hatfield, PA, USA), using acetonitrile as  
215 a transition solvent. Semi-thin sections were made with a Leica EM UC7 ultramicrotome (Leica

216 Microsystems; GmbH Vienna, Austria), stained with Toluidine Blue, and imaged with a Zeiss  
217 Axio Imager.Z2 (Carl Zeiss Microscopy, Thornwood, NY, USA). Ultrathin sections were stained  
218 with uranyl acetate and lead citrate following standard procedures, and electron microscopy was  
219 performed on a Tecnai G2 Spirit BioTWIN 20-120 kV digital electron microscope (FEI Company;  
220 Hillsboro, OR, USA). Micrographs were acquired with a Gatan image filter and an Orius 832  
221 CCD Camera (Gatan, Inc.; Pleasanton, CA, USA).

222

### 223 **Optokinetic Response (OKR)**

224 OKR measurements on 5-6 dpf larvae were conducted between 12-6 pm using the  
225 VisioTracker system (VisioTracker 302060 Series, TSE Systems, GmbH Bad Homburg,  
226 Germany). Contrast sensitivity was assessed as described previously [38, 39]. For the spatial  
227 frequency response function [39, 40], the contrast was held constant at 70% and we tested  
228 stimuli of 0.02, 0.04, 0.06, 0.08, 0.12, and 0.16 cycles/degree by first increasing and then  
229 decreasing the frequency. Each spatial frequency stimulus was presented for 3 seconds before  
230 reversing direction for another 3 seconds to minimize saccade frequency. All OKR stimuli were  
231 presented with a constant angular velocity of 7.5 degrees per second. The genotypes of  
232 individual larvae were confirmed following OKR tests.

233

### 234 **Immunohistochemistry and fluorescence imaging**

235 Larvae were fixed for 2 hrs. at 4 °C. Adult eyes were fixed at the designated time points.  
236 Fixation protocols varied depending on the primary antibodies being used. For Zpr-1, Zpr3,  
237 GRK1, and GNB1, samples were fixed in 4% paraformaldehyde in 0.8X PBS at 4 °C overnight.  
238 For peanut agglutinin (PNA) and acetylated tubulin staining, heads were fixed in 4%  
239 paraformaldehyde in 0.8X PBS at 4 °C for a maximum of 2 hrs. All samples were cryoprotected  
240 in 30% sucrose overnight. Cryosections (10 µM) were cut and dried at room temperature  
241 overnight. Blocking solution (1% BSA, 5% normal goat serum, 0.2% Triton-X-100, 0.1% Tween-

242 20 in 1X PBS) was applied for 2 hrs in a dark, humidified chamber. Primary antibodies were  
243 diluted in blocking solution as follow: Zpr-1 and Zpr-3 (1:200; Zebrafish International Resource  
244 Center, University of Oregon, Eugene, OR, USA), GNB1 (1:100; Abgent AP5036a), GRK1  
245 (1:50; Abclonal A6497), and acetylated- $\alpha$ -tubulin (1:5000; Sigma 6-11-B1). Conjugated  
246 secondary antibodies were purchased from Invitrogen Life Technologies (Carlsbad, CA, USA)  
247 and used at 1:500 dilutions and 4,6-diamidino-2-phenylendole (DAPI; 1:1000) was used to label  
248 nuclei. Optical sections were obtained with a Zeiss Axio Imager.Z2 fluorescent microscope fitted  
249 with the Apotome.2 for structured illumination (Carl Zeiss Microscopy, Thornhill, NY. USA).  
250 ImageJ was used to create image panels. Figures were assembled in Adobe Photoshop. To  
251 quantify cone outer segment density, the number of PNA-positive outer segments was  
252 determined from images of transverse sections of dorsal retinas. The distance of retina  
253 measured in each section was determined using ImageJ and density was calculated as the  
254 number of cone outer segments per 50 microns of retina. Each data point represented one  
255 section from a distinct retina. To quantify rhodopsin mislocalization, ImageJ was used to  
256 measure the integrated fluorescence density (IFD) across a region of interest (ROI) of defined  
257 area that was placed in the rod outer segments (ROS; proper localization), inner segment/outer  
258 nuclear layer (IS/ONL; mislocalized) or the inner nuclear layer (INL; background fluorescence).  
259 Corrected fluorescence intensities were calculated by subtracting the background fluorescence.  
260 The total rhodopsin fluorescence was calculated as the sum of the IFD from the ROS and  
261 IS/ONL. The percentage of mislocalized rhodopsin was calculated as the IFD from the IS/ONL  
262 (numerator) per total rhodopsin (denominator).

263

## 264 **RT-PCR**

265 For traditional RT-PCR, total RNA was extracted from pooled wild-type larvae at 5 dpf for  
266 positive control (tunicamycin), and from 4 isolated retinas from wild-type and *cep290*<sup>fh297/fh297</sup>  
267 mutants at the designated time points using TRIzol according to standard protocols. cDNA was

268 reverse transcribed using SuperScript II reverse transcriptase and random hexamers according  
269 to the manufacturer's instructions (ThermoFisher Scientific, Waltham, MA. USA). RT-PCR was  
270 performed according to standard protocols and cycling conditions.

271

272 *Exon skipping*: cDNA from wild-type and *cep290<sup>fh297/fh297</sup>* mutants was obtained as described  
273 above. Primers were designed to encompass the mutated exon as follow: primers targeting  
274 exons 27-32 for *cep290<sup>fh297/fh297</sup>* (5' – AGAATCACTGAACTGGAGAAAACAG – 3' and  
275 TTCCTTTTCTTTAGCTTCTCTTCC – 3') with products sizes – 1040 bp when mutated exon is  
276 included and 593 when mutated exon is skipped.

277

278 *Droplet digital PCR*: RNA was isolated from whole eyes of 6-month old *cep290* mutant and  
279 sibling control animals (n = 9 per group) with Trizol (ThermoFisher 15596026). Reverse  
280 transcription using 1 µg RNA was performed with the iScript cDNA Synthesis kit (Bio-Rad  
281 1708891). Intron-spanning primers and probes for *cep290* and *ef1a111* were designed with  
282 Primer3Plus (<http://primer3plus.com>). Sequences are as follows: *cep290*F –  
283 ACACCGTCATCCAGCTGAAG; *cep290*R – CTGGCAAGACCTTCGTCAGT;  
284 *cep290*probe(FAM) – ACGTCCCTGTGGAAGCGACC; *ef1a111*F –  
285 CGTCTGCCACTTCAGGATGT; *ef1a111*R – CCCAGCCTTCAGAGTTCCAG;  
286 *ef1a111*probe(HEX) – ACTGTGCCTGTGGGACGTGT. Multiplexed PCR reactions using 100 ng  
287 cDNA were prepared with the ddPCR supermix for probes (No dUTP, Bio-Rad 1863024) and  
288 fractionated into >20,000 droplets using the Bio-Rad QX200 droplet generator with droplet  
289 generation oil for probes (Bio-Rad 1863005). PCR cycling was performed using a 60 degree C  
290 annealing temperature, and droplet signal was detected with a QX200 droplet reader (Bio-  
291 Rad). Target copy number was determined with QuantaSoft Analysis Pro software (Bio-Rad)  
292 after droplets were manually thresholded relative to no-template control reactions.

293

294

295 **Statistics**

296 Graphs were generated using Prism6 (GraphPad Software; San Diego, USA). Statistical

297 analyses were performed using a one-way ANOVA with a Multiple Comparisons test and

298 Tukey's correction or 2-way ANOVA with a Multiple Comparisons test and Sidek corrections.

299 For all tests, P-values less than 0.05 were considered significant.

## 300 RESULTS

### 301 Identification of a nonsense mutation in zebrafish *cep290* gene

302 In zebrafish, the primary *cep290* transcript (RefSeq: NM\_001168267) encodes a 2439  
303 amino acid protein. The *cep290<sup>fh297</sup>* allele was identified by the Zebrafish TILLING Consortium.  
304 This C>T transition mutation results in a stop codon (p.Gln1217X) downstream of the Cc2d2a  
305 binding domain [12] and upstream of the putative Rab8a binding domain. This mutation was  
306 predicted to truncate the protein by almost half (Fig. 1A) and is near a similar mutation in  
307 humans (p.Gln1265X) that associated with LCA and JBTS (<https://cep290base.cmgg.be/>). We  
308 confirmed the mutation by direct sequencing (Fig. 1B). To date, no paralogue to *cep290* has  
309 been reported in zebrafish. To assess the impact of the *fh297* allele on gene expression,  
310 *cep290* mRNA was quantified by digital droplet PCR (ddPCR). In adult animals, retinal  
311 expression of *cep290* mRNA was reduced by 55% in mutants compared to expression in wild-  
312 type siblings (Fig. 1C). Efforts to measure Cep290 protein by western blot were unsuccessful,  
313 despite multiple attempts with both commercial [41] and custom designed antibodies [42]. In  
314 fibroblasts derived from an LCA patient with the c.2991+1665A>G mutation, wild-type *CEP290*  
315 transcripts were similarly reduced by ~60%, which resulted in a corresponding reduction in  
316 protein levels by ~80% [43].

317

### 318 **Figure 1. Genetic mapping and identification of *cep290* mutant allele**

319 (A) Schematic structure of zebrafish Cep290 illustrating the location of predicted protein  
320 domains. Domain structure is based on prior results [12, 44, 45]. The *cep290<sup>fh297</sup>* allele  
321 generates a premature stop codon at amino acid 1217. (B) Chromatograms of Sanger  
322 sequencing reactions of cDNAs from wild-type and homozygous *cep290<sup>fh297/fh297</sup>* mutant  
323 confirming the C>T replacement. (C) Quantification of *cep290* mRNA in 6 month old wild-type  
324 and mutant retinas by digital droplet PCR (ddPCR). (D) Lateral views of representative wild-  
325 type (top), heterozygous (middle), and homozygous (bottom) mutants at 5 dpf. At larval stage  
326 30% of *cep290<sup>fh297/fh297</sup>* mutant animals show ventral tail curvature. (E) Lateral view of 7 month  
327 old wild-type, heterozygous and a representative *cep290<sup>fh297/fh297</sup>* mutants displaying distorted  
328 vertebral column. At adult stage 100% of the homozygous mutant animals show scoliosis of the  
329 vertebral column. (F) Representative  $\mu$ CT-generated images of lateral (top) and dorsal  
330 (bottom) views of adult wild-type and *cep290<sup>fh297/fh297</sup>* mutants. Images demonstrate that spinal  
331 curvature deviates within the dorsal/ventral plane as well as curves laterally (arrows).  
332

333           At 5 days post fertilization (dpf) *cep290<sup>fh297/fh297</sup>* mutants exhibited a sigmoidal tail  
334 curvature and did not yet have an inflated swim bladder (Fig. 1D). These phenotypes were not  
335 fully penetrant with only 29% of mutant larvae exhibiting such characteristics (17 of 58  
336 confirmed *cep290<sup>fh297/fh297</sup>* mutants). Furthermore, these phenotypes were similar to, but distinct  
337 from phenotypes of other zebrafish mutants with defective cilia formation, such as *ift88* or  
338 *cc2d2a* mutants, which exhibit a ventral axis curvature [40, 46, 47]. All *cep290<sup>fh297/fh297</sup>* mutants  
339 exhibited normal otolith numbers and only 6.8% (4 of 58 confirmed *cep290<sup>fh297/fh297</sup>* mutants)  
340 developed kidney cysts by 5 dpf. Although *cep290<sup>fh297/fh297</sup>* mutants routinely survived to  
341 adulthood in Mendelian ratios, approximately 17% fewer *cep290<sup>fh297/fh297</sup>* mutants were present  
342 at 12 months of age than would be expected (25 out of 120 total fish). The *cep290<sup>fh297/fh297</sup>*  
343 mutants were unable to breed and 100% of the mutants exhibit a severe scoliosis (Fig. 1E, F), a  
344 phenotype previously linked to defective cilia [48] and a pathology has been reported in a  
345 subset of Joubert Syndrome patients with *CEP290* mutations [49]. The abnormal spinal  
346 curvature was also assessed by micro-computed tomography ( $\mu$ CT) and revealed a significant  
347 deviation in spinal curvature that was pronounced in both the dorsal-ventral axis as well as a  
348 lateral curvature (Fig. 1F).

349           As the *cep290<sup>fh297</sup>* allele encodes a nonsense mutation, we were curious about the  
350 relatively mild phenotype compared to the *Cep290* mouse knockout models [14]. A recent  
351 hypothesis proposed that if nonsense mutations occur in exons that begin and end in the same  
352 reading frame, those exons can be preferentially skipped in a process known as “nonsense-  
353 induced alternative splicing” [50]. These alternatively spliced transcripts can escape nonsense-  
354 mediated decay and produce near-full-length protein. Such phenomenon were reported to  
355 occur in Leber Congenital Amaurosis and Senior-Løken Syndrome patients with mutations in  
356 *CEP290* [25, 37]. The *cep290<sup>fh297</sup>* allele is a nonsense mutation occurring in exon 29 and exon  
357 skipping would maintain the reading frame. We performed RT-PCR on cDNA from adult retinas  
358 from wild-type and *cep290* mutant retinas and used primers that spanned the mutated exon.

359 We showed that the mutant exon was present in all detectable transcripts, indicating that  
360 nonsense-mediated alternative splicing did not occur for this mutation in zebrafish (Figs. 2A, B).

361

362 **Figure 2. Exon skipping of *cep290* exons 29 does not occur in zebrafish retinas**

363 (A) Forward (F1) and reverse (R1) PCR primers were designed to bind sequences in exons 27  
364 and 32 in order to flank exon 29 harboring the mutant *cep290<sup>fh297</sup>* allele. Exon skipping would  
365 result in a truncated PCR product of 593 bp, while retention of exon 29 would result in a full-  
366 length 1040 bp product. (B) Results of PCR reactions from cDNAs generated from wild-type and  
367 samples of two individual mutants resulted in full-length products of 1040 bp. 100 bp ladder  
368 shown in lane 1.

369

370

371 **Functional vision is preserved in *cep290* mutant larvae**

372 As humans with *CEP290* mutations report variable loss of visual function [9], we asked  
373 whether the visual performance of zebrafish *cep290* mutants was also compromised. Visual  
374 acuity is a measure of the spatial resolving power of the visual system and is mainly driven by  
375 cones [51, 52]. Larval zebrafish visual function can be readily assessed using the optokinetic  
376 response (OKR) assay by presenting larvae with a moving grating stimuli that varies in either  
377 contrast or spatial frequency [39]. Detecting contrast differences of a stimulus presented at  
378 fixed spatial and temporal frequencies is a general method of testing function vision, while  
379 detecting the changes in spatial frequency of a stimulus at a fixed contrast under bright  
380 illumination assesses cone acuity. Because larval zebrafish rely exclusively on cone function at  
381 5-6 dpf [53, 54], all recordings were done under photopic conditions [55]. We measured the  
382 OKR gain, which is defined by the ratio between stimulus velocity and eye velocity [38-40], of  
383 wild-type, and *cep290<sup>fh297/fh297</sup>* mutants between 5-6 dpf using established parameters [39, 56]  
384 and reproduced by our laboratory [38, 40]. Wild-type larvae (n = 12) showed a linear  
385 relationship between gain and the logarithm of contrast (Fig. 3A). Interestingly, the  
386 *cep290<sup>fh297/fh297</sup>* mutants (n = 26) exhibited normal OKR responses to changes in stimulus  
387 contrast and spatial frequency (Fig. 3A, B).



388 **Figure 3. Visual performance is not affected in *cep290* mutant larvae at 5 dpf**  
389 (A) Optokinetic response (OKR) contrast response function of 5 dpf wild-type larvae (n = 11;  
390 open circles) and *cep290<sup>fh297/fh297</sup>* mutants (n = 26; closed circles). No significant differences  
391 were found. (B) OKR spatial frequency results for wild-type larvae (n = 13) and *cep290<sup>fh297/fh297</sup>*  
392 mutants (n = 15). Error bars = s.e.m.  
393

394

395

### 396 **Photoreceptor degeneration in *cep290<sup>fh297/fh297</sup>* mutants**

397 We next examined the retinal anatomy of wild-type and *cep290<sup>fh297/fh297</sup>* mutants by light  
398 microscopy at 5 dpf, 3 months post fertilization (mpf), 6 mpf, and 12 mpf (Fig. 4). Normal retinal  
399 lamination and cellular differentiation was observed in *cep290<sup>fh297/fh297</sup>* mutants at 5 dpf (Fig. 4A),  
400 indicating that retinal development did not require Cep290. At 3 mpf, we noticed fewer and  
401 more disorganized cone outer segments in *cep290<sup>fh297/fh297</sup>* mutants (Figs. 4B, white arrow).  
402 Cone disorganization in *cep290<sup>fh297/fh297</sup>* mutants was progressive and by 6 mpf the loss of cone  
403 outer segments (COS) was more evident (Figs. 4C). By 12 mpf, only a few discernable cones  
404 remained in the *cep290<sup>fh297/fh297</sup>* mutants (Figs. 4D, arrows). Also noticeable was the continued  
405 thinning of the retinal outer nuclear layer (ONL) in *cep290<sup>fh297/fh297</sup>* mutant retinas when  
406 compared to wild-type animals (Figs. 4E, F). The thickness of the ONL was reduced across the  
407 peripheral and central retina, although the difference was only statistically significant in the  
408 dorsal retina (Fig. 4E). When the rows of nuclei in the ONL was quantified, a statistically  
409 significant difference was seen in the periphery of the dorsal retina (Fig. 4F;  $4.1 \pm 0.3$  vs  $3.1 \pm 0.3$   
410 rows of nuclei,  $P < 0.05$ ; n = 6).

411

### 412 **Figure 4. Progressive cone loss in adult *cep290<sup>fh297/fh297</sup>* mutants**

413 Methylene blue stained transverse histological sections of retinas from wild-type (top) and  
414 *cep290<sup>fh297/fh297</sup>* mutants (bottom) at 5 dpf (A); 3 months of age (B), 6 months of age (C), and 12  
415 months of age (D). At 3 months, the *cep290<sup>fh297/fh297</sup>* mutants (bottom) had noticeably fewer  
416 cones (white arrows) and thinning of the cone outer segment (COS) layer. Few cones were  
417 observed at 12 months of age in *cep290<sup>fh297/fh297</sup>* mutants (black arrows). (E) Quantification of  
418 ONL thickness and (F) rows of nuclei in the ONL at different distances from the optic nerve in  
419 both the dorsal (negative numbers; left) and ventral (positive numbers; right) retina of

420 *cep290<sup>fh297/fh297</sup>* mutants and wild-type sibling controls at 8 months of age. Data are shown as  
421 means  $\pm$  SEM (n = 6, \*P  $\leq$  0.05). ROS, rod outer segments; COS, cone outer segments; ONL,  
422 outer nuclear layer; OPL, outer plexiform layer; INL, inner nuclear layer; IPL, inner plexiform  
423 layer; GCL, ganglion cell layer. Scale bar: 100  $\mu$ m  
424

425 We next used electron microscopy to examine retinal sections of wild-type and  
426 *cep290<sup>fh297/fh297</sup>* mutant adults (6 mpf) to determine how loss of Cep290 affected photoreceptor  
427 structure. In *cep290<sup>fh297/fh297</sup>* mutants, few cone outer segments were observed and the outer  
428 retina of *cep290<sup>fh297/fh297</sup>* mutants was more disorganized than that seen in wild-type retinas  
429 (Figs. 5A-C). At higher magnification, whereas the outer segments of wild-type animals  
430 contained highly organized stacks of disc membranes, the disc membranes were fragmented  
431 and the outer segments appear to be disintegrating in *cep290<sup>fh297/fh297</sup>* mutants (Figs. 5D, E).  
432 We did not, however, observe any consistent accumulation of vesicular material adjacent to the  
433 ciliary base or other signs of disrupted ciliary trafficking (Figs. 5D, E; white arrowheads). These  
434 results suggest that loss of Cep290 disrupts cone outer segment structure and causes cell  
435 death.

436 **Figure 5. Cone degeneration marked by outer segment disorganization in *cep290<sup>fh297/fh297</sup>***  
437 **mutants**

438 (A-C) Transmission electron micrographs of retinal sections from 6 month old wild-type (A) and  
439 *cep290<sup>fh297/fh297</sup>* mutant adults (B, C). Cone outer segments and mitochondria in the ellipsoids  
440 are visible in the wild-type retina. In the *cep290<sup>fh297/fh297</sup>* mutant retinas, cone outer segments  
441 are missing or disorganized (arrows) and the outer nuclear layer (ONL, white line) is reduced to  
442 1-2 nuclei. (D, E) At higher magnification, the outer segment disc membranes are tightly  
443 stacked in wild-type retinas. In *cep290<sup>fh297/fh297</sup>* mutants, numerous vesicular structures and  
444 disorganized membranes are seen in cone outer segments (bracket). Rod outer segments are  
445 largely preserved and the connecting cilia are shown (white arrowheads). Scale bars: 10  $\mu$ m  
446 (A-C); 2  $\mu$ m (D, E).  
447

448

449 **Progressive cone degeneration in *cep290<sup>fh297/fh297</sup>* mutants**

450 To track the progression of photoreceptor degeneration, immunohistochemistry was  
451 performed on retinal cryosections of *cep290<sup>fh297/fh297</sup>* mutants at 3, 6, and 12 months of age.  
452 Retinas were stained with peanut agglutinin lectin (PNA) to label the interphotoreceptor matrix

453 surrounding cone outer segments [57] and Zpr-1, a monoclonal antibody that recognizes  
454 arrestin-3 like (Arr3L) on the cell bodies of red- and green-sensitive double cones [58, 59].  
455 Similar to the results from plastic histology, the PNA-labeled cone outer segments were less  
456 organized and the inner segments appeared less densely packed in the *cep290<sup>fh297/fh297</sup>* mutants  
457 at 3 months of age as compared to wild-type siblings (Figs. 6A-F). Cone degeneration in the  
458 *cep290<sup>fh297/fh297</sup>* mutants was more apparent by 6 months of age (Figs. 6G-L) and by 12 months  
459 of age, very few cones remained (Figs. 6M-R). In older *cep290<sup>fh297/fh297</sup>* mutants, some cones  
460 had Zpr-1 positive inner segments but lacked PNA-positive outer segments (Figs. 6L, R;  
461 arrows), indicating that outer segment loss preceded cone death. This is consistent with a role  
462 for Cep290 in sensory cilia maintenance. The density of PNA-positive cone outer segments in  
463 wild-type and *cep290<sup>fh297/fh297</sup>* mutants were quantified at each time point (Fig. 7). The results  
464 indicated that cone degeneration initiated by 3 months of age in *cep290<sup>fh297/fh297</sup>* mutants and  
465 progressed such that very few cone outer segments (1.6 COS / 50  $\mu$ m) remained by 12 months  
466 of age.

467

468 **Figure 6. Cone outer segment degeneration progresses with age in *cep290<sup>fh297/fh297</sup>***  
469 **mutants**

470 Immunohistochemistry of retinal cryosections stained with peanut agglutinin (PNA) to label cone  
471 outer segments and Zpr-1 (green) to label red/green double cones of wild-type and  
472 *cep290<sup>fh297/fh297</sup>* mutants. Views from dorsal retinas are shown. (A-F) Retinas from 3-month old  
473 adults. (G-L) Retinas from 6-month old adults. (M-R) Retinas from 12-month old adults. Arrows  
474 denote cones that were negative for PNA but positive for Zpr-1. ROS, rod outer segments;  
475 COS, cone outer segments; CIS, cone inner segments; ONL, outer nuclear layer; INL, inner  
476 nuclear layer; IPL, inner plexiform layer; GCL, ganglion cell layer. Scale bar: 50  $\mu$ m  
477

478

479 **Figure 7. Cone outer segment density declines with age in *cep290<sup>fh297/fh297</sup>* mutants**

480 Quantification of cone outer segment density at ages from Figure 6. The number of independent  
481 fish used for each measurement is indicated. \* $P < 0.05$ ; \*\*\*  $P < 0.0005$ ; \*\*\*\*  $P < 0.0001$  as  
482 determined by a 2-way ANOVA with a Multiple Comparisons test and Sidak corrections.  
483

484

485

## 486 **Distribution of rod outer segment proteins in *cep290<sup>fh297/fh297</sup>* mutants**

487           Loss of Cep290 is associated with rapid loss of rods and rhodopsin mislocalization in the  
488 mouse *cep290<sup>rd16/rd16</sup>* mutant [20]. Rhodopsin is a G-protein coupled receptor with seven  
489 transmembrane domains that passes along the ciliary plasma membrane before becoming  
490 incorporated into disc membranes within the outer segment. To evaluate the effects of Cep290  
491 loss on rods in zebrafish, we stained retinal cryosections from *cep290<sup>fh297/fh297</sup>* mutants and wild-  
492 type siblings with the monoclonal antibody Zpr3, which recognizes rhodopsin. At 3 mpf, when  
493 the first signs of cone degeneration were observed in *cep290<sup>fh297/fh297</sup>* mutants, rhodopsin  
494 localized to the outer segments of both *cep290<sup>fh297/fh297</sup>* mutants and wild-type control animals  
495 (Figs. 8A-D). By 6 mpf, when cone degeneration was pronounced, a significant amount of  
496 rhodopsin mislocalized to the inner segments and cell bodies (Figs. 8E-H; arrowheads).  
497 Rhodopsin continued to be mislocalized at 12mpf (Figs. 8I-L; arrowheads), but significant loss of  
498 rod outer segment material was not observed. At 12 mpf, however, we noticed that the gap  
499 between the rod outer segments and the ONL, which typically is occupied by cone nuclei, was  
500 considerably smaller in 12 month-old animals as compared to wild-type siblings (Figs. 8I, J;  
501 white brackets).

502

### 503 **Figure 8. Mislocalization of rhodopsin in *cep290<sup>fh297/fh297</sup>* mutants**

504 (A-D) Images show cryosections labeled with Zpr3 (red) to mark rhodopsin and DAPI (blue) to  
505 label nuclei in the dorsal retinas from *cep290<sup>fh297/fh297</sup>* mutants and wild-type siblings at 3 months  
506 of age; (E-H) 6 months of age, and (I-L) 12 months of age. At later ages, the distance between  
507 the base of the rod outer segments and the outer nuclear layer decreases due to loss of cone  
508 nuclei (I, J; white brackets). Arrowheads note rhodopsin mislocalization. ROS, rod outer  
509 segments; COS, cone outer segments; CIS, cone inner segments; ONL, outer nuclear layer;  
510 OPL, outer plexiform layer; INL, inner nuclear layer. Scale bar: 100  $\mu$ m

511

512           Active transport of cytosolic and transmembrane proteins (e.g. rhodopsin) through the  
513 ciliary TZ to the photoreceptor outer segments requires intraflagellar transport (IFT), while  
514 transport of lipidated protein cargo requires a distinct targeting system utilizing either PDE6D or  
515 UNC119 [60]. We therefore investigated the localization rhodopsin kinase (GRK1) and the  $\beta$

516 subunit of rod transducin (GNB1), to determine if loss of Cep290 also disrupts trafficking of  
517 lipidated ciliary proteins. GRK1 is a prenylated membrane protein that requires the function of  
518 Retinitis Pigmentosa 2 (RP2) for proper transport to rod outer segments [61]. Membrane  
519 association of GNB1 requires direct binding to the protein RP2 and loss of RP2 disrupts outer  
520 segment trafficking of both GNB1, GRK1, and other prenylated proteins [62-64]. In retinal  
521 cryosections from animals at both 6 months and 12 months of age, we found that GRK1  
522 localized to the rod outer segments of *cep290<sup>fh297/fh297</sup>* mutants, similar to wild-type siblings (Figs.  
523 9A-H). At both 6 and 12 months of age, the majority of GNB1 also localized to the rod outer  
524 segments of both wild-type and *cep290<sup>fh297/fh297</sup>* mutants (Figs. 9I-P). Taken together, these  
525 results suggest that loss of Cep290 specifically affects rhodopsin localization without broadly  
526 impairing transport of all outer segment proteins.

527  
528  
529  
530  
531  
532  
533  
534  
535  
536  
537

**Figure 9. Immunolocalization of GRK1 and GNB1 in *cep290<sup>fh297/fh297</sup>* mutants at 6 and 12 months of age**

Retinal cryosections of *cep290<sup>fh297/fh297</sup>* mutants and wild-type siblings were stained with polyclonal antibodies against rhodopsin kinase (A-H; GRK1) or with GNB1 polyclonal antibodies against the  $\beta$  subunit of rod transducin (I-P) to label rod outer segments at both 6 and 12 months of age. ROS, rod outer segments; COS, cone outer segments; ONL, outer nuclear layer; OPL, outer plexiform layer; INL, inner nuclear layer; RGC, retinal ganglion cells. Scale bar: 50  $\mu$ m

538

539 In response to retinal injury, zebrafish typically exhibit a robust capability of regenerating  
540 lost neurons, including photoreceptors [65, 66]. In the uninjured retina, Müller glia in the inner  
541 nuclear layer (INL) will periodically divide and produce unipotent rod progenitor cells that  
542 migrate to the ONL where they can proliferate as rod precursors and differentiate into rod  
543 photoreceptors [67-69]. In response to acute retinal damage, however, the Müller glia will  
544 dedifferentiate, undergo cellular reprogramming, and produce multipotent retinal progenitors  
545 that proliferate and are able to differentiate into all retinal cell types, including cones [66, 70].  
546 Given this regenerative capacity, it was surprising to observe photoreceptor degeneration

547 *cep290<sup>fh297/fh297</sup>* mutants. To determine if *cep290<sup>fh297/fh297</sup>* mutants attempted regeneration,  
548 retinas from 3-month and 6-month old *cep290<sup>fh297/fh297</sup>* mutants and wild-type siblings were  
549 stained with antibodies against proliferating cell nuclear antigen (PCNA), which is a marker of  
550 cell proliferation, and quantified the number of PCNA+ cells in the ONL and inner nuclear layer  
551 (INL). Only a small number of individual proliferating cells were seen in the INL of 3 month old  
552 *cep290<sup>fh297/fh297</sup>* mutants ( $7.7 \pm 3.5$ ) or wild-type siblings ( $10.9 \pm 1.5$ ) and no statistical difference  
553 was found (Figs. 10A, B;  $n = 6$ ;  $P = 0.15$ ). Compared to the INL, there were up to 10-fold more  
554 proliferating cells in the ONL of 3-month old mutant ( $82.7 \pm 17.2$ ) and wild-type siblings  
555 ( $62.3 \pm 12.8$ ), but still no statistical difference seen (Figs. 10A, C;  $n = 6$ ;  $P = 0.06$ ). At 6 months  
556 of age, however, significantly more proliferating cells were found in both the INL and ONL of  
557 *cep290<sup>fh297/fh297</sup>* mutants (Figs. 10B, C). Compared to wild-type siblings, there were 3-fold more  
558 proliferating cells in the INL and 10-fold more cells in the ONL of *cep290<sup>fh297/fh297</sup>* mutants. Of  
559 note, proliferating cells were 10-fold more abundant in the ONL than in the INL of  
560 *cep290<sup>fh297/fh297</sup>* mutants (note differences in Y-axes in Figs. 10B, C). This suggests  
561 photoreceptor degeneration in *cep290<sup>fh297/fh297</sup>* mutants triggers robust proliferation of rod  
562 progenitor cells but only limited proliferation of Müller glia.

563

564

565 **Figure 10. PCNA localization in *cep290<sup>fh297/fh297</sup>* mutants at 3 and 6 months of age.**

566 (A) PCNA immunolocalization in cryosections of the dorsal retina of wild-type (top) and  
567 *cep290<sup>fh297/fh297</sup>* mutants (bottom) at 3-months and 6-months of age. (B) PCNA positive cells  
568 were quantified in the INL from cryosections of the both dorsal and ventral retina at different  
569 ages. (C) Quantification of PCNA in the ONL from cryosections across the dorsal and ventral  
570 retina at different ages. A significant increase in PCNA immunoreactivity was seen in both the  
571 INL and ONL of *cep290<sup>fh297/fh297</sup>* mutants at 6 months of age. Quantification was performed on  
572 cryosections of individual retinas from *cep290<sup>fh297/fh297</sup>* mutants ( $n = 6$ ) and wild-type siblings ( $n =$   
573  $5$ ) at the stated ages. Values represent the mean  $\pm$  s.e.m.  $*P < 0.05$ ;  $**** P < 0.0001$  as  
574 determined by an unpaired t-test. ONL, outer nuclear layer; INL, inner nuclear layer; RGC,  
575 retinal ganglion cells. Scale bar: 50  $\mu$ m

576

577

578 **Effects of the combined loss of *cep290* and cilia genes *ahi1*, *cc2d2a*, or *arl13b***  
579 **differentially affects visual acuity but does not exacerbate photoreceptor degeneration**

580 A leading hypothesis to explain phenotypic variability in ciliopathies is the effects of  
581 mutations in second-site modifiers [26-29]. Typically, heterozygosity (i.e. loss of one allele) in  
582 cilia genes exacerbates the phenotypes observed in homozygous mutants of other cilia genes.  
583 Analysis of animals with homozygous mutations in two distinct genes may reflect the additive  
584 effect of two independent phenotypes and not necessarily a role for second-site modifiers.  
585 Because the loss of *cep290* leads to slow cone degeneration in zebrafish, we asked whether  
586 heterozygous mutations in genes encoding other cilia proteins would accelerate degeneration.  
587 The Cc2d2a and Ahi1 proteins are components of the MKS module that make up part of the TZ  
588 [28]. In humans, mutations in *AHI1* and *CC2D2A* cause Joubert Syndrome and both genes  
589 have been proposed as potential modifiers of *CEP290* [12, 33]. Cep290 directly binds Cc2d2a  
590 through an N-terminal domain of Cep290 [12] and Cep290 is predicted to bind Ahi1, suggesting  
591 that these connections are critical for TZ assembly or stability. Mutations in *ARL13B* also result  
592 in Joubert Syndrome. The Arl13b protein is required for axoneme extension and photoreceptor  
593 outer segment formation [34]. Importantly, the zebrafish *cc2d2a*<sup>-/-</sup> and *ahi1*<sup>-/-</sup> mutants show  
594 defects in photoreceptor OS structure during larval stages [40, 47] while the *arl13b*<sup>-/-</sup> zebrafish  
595 mutant undergoes a progressive photoreceptor degeneration [35]. The known and proposed  
596 biochemical and genetic interactions, as well as similar protein localization patterns in the  
597 transition zone and axoneme, suggested that these genes could potentially modulate  
598 phenotypes associated with Cep290 mutations.

599 As *cep290*<sup>fh297/fh297</sup> adults were unable to breed naturally, heterozygous animals were  
600 mated to generate *cep290*<sup>+/fh297</sup>;*ahi1*<sup>+/-</sup>, *cep290*<sup>+/fh297</sup>;*cc2d2a*<sup>+/-</sup>, and *cep290*<sup>+/fh297</sup>;*arl13b*<sup>+/-</sup> adults.  
601 Pairwise crosses from these adults generated all possible genotypes in the expected Mendelian  
602 ratios. The double homozygous mutants (e.g. *cep290*<sup>fh297/fh297</sup>;*ahi1*<sup>-/-</sup> and  
603 *cep290*<sup>fh297/fh297</sup>;*cc2d2a*<sup>-/-</sup>; and *cep290*<sup>fh297/fh297</sup>;*arl13b*<sup>-/-</sup>) did not survive beyond 14 dpf. The

604 *cep290<sup>fh297/fh297</sup>;ahi1<sup>+/-</sup>*, *cep290<sup>fh297/fh297</sup>;cc2d2a<sup>+/-</sup>*; and *cep290<sup>fh297/fh297</sup>;arl13b<sup>+/-</sup>* mutants were  
605 viable beyond 12 months and were indistinguishable from *cep290<sup>fh297/fh297</sup>* mutants.

606 We next wanted to determine if loss of *cep290* sensitizes photoreceptors to the  
607 additional loss of one allele of either *ahi1*, *arl13b*, or *cc2d2a* and would accelerate cone or rod  
608 degeneration. We first assessed cone degeneration by immunohistochemistry using the  
609 markers PNA and Zpr-1 on retinas from 6-month old *cep290<sup>fh297/fh297</sup>;ahi1<sup>+/-</sup>* (Fig. 11A),  
610 *cep290<sup>fh297/fh297</sup>;cc2d2a<sup>+/-</sup>* mutants (Fig. 12A) and *cep290<sup>fh297/fh297</sup>;arl13b<sup>+/-</sup>* mutants (Fig. 13A)  
611 when compared to wild-type and *cep290<sup>fh297/fh297</sup>* mutants. We quantified cone density within the  
612 dorsal retina for each genotype (Figs. 11D, 12D, 13D). Whereas *cep290<sup>fh297/fh297</sup>* mutants  
613 exhibited reduced numbers of cone outer segments, no additional increase in cone loss was  
614 observed in the *cep290<sup>fh297/fh297</sup>;ahi1<sup>+/-</sup>*, *cep290<sup>fh297/fh297</sup>;cc2d2a<sup>+/-</sup>* or *cep290<sup>fh297/fh297</sup>;arl13b<sup>+/-</sup>*  
615 mutants (Figs. 11D, 12D, 13D). Retinal sections were also stained with antibodies against  
616 rhodopsin and rhodopsin kinase (GRK1) to assess trafficking of rod outer segment proteins  
617 (Figs. 11B, 11C, 12B, 12C, 13B, and 13C). Rhodopsin mislocalization was quantified by  
618 measuring integrated fluorescence density in the rod inner and outer segments (see Methods).  
619 Whereas considerable rhodopsin mislocalization was observed in *cep290<sup>fh297/fh297</sup>* mutants, there  
620 was no significant exacerbation of this phenotype by the additional loss of one allele of *ahi1*,  
621 *cc2d2a*, or *arl13b* (Figs. 11E, 12E, 13E). GRK1 localized to the rod outer segments in wild-type  
622 animals and in all mutant genotypes (Figs. 11C, 12C, 13C).

623

624 **Figure 11. Combined loss of *cep290* and *ahi1* does not exacerbate cone degeneration or**  
625 **rhodopsin trafficking defects**

626 Panels show immunohistochemical analysis of dorsal retinas from wild-type (top),  
627 *cep290<sup>fh297/fh297</sup>* (middle), and *cep290<sup>fh297/fh297</sup>;ahi1<sup>+/-</sup>* mutants (bottom) at 6 months of age stained  
628 with (A) PNA (red) and Zpr-1 (green) to label cone photoreceptor; (B) Zpr-3 to label rhodopsin;  
629 or (C) GRK1 to label rhodopsin kinase. ROS, rod outer segments; COS, cone outer segments;  
630 ONL, outer nuclear layer; OPL, outer plexiform layer; INL, inner nuclear layer; IPL, inner  
631 plexiform layer; RGC, retinal ganglion cells. Scale bar: 50  $\mu$ m. (D) Quantification of cone outer  
632 segment density or (E) rhodopsin mislocalization from the indicated genotypes at 6 months of  
633 age. See methods section for details on quantification. Removing one allele of *ahi1* from a  
634 *cep290<sup>fh297/fh297</sup>* mutant background had no effect on cone degeneration or rhodopsin



635 mislocalization. At least 5 unique fish over at least 2 independent experiments were evaluated.  
636  $**P < 0.01$ ;  $***P < 0.0005$ ;  $****P < 0.0001$  as determined by a 1-way ANOVA with a Multiple  
637 Comparisons test and Tukey corrections. Data represented as means  $\pm$  s.e.m.

638

639 **Figure 12. Combined loss of *cep290* and *cc2d2a* does not exacerbate cone degeneration**  
640 **or rhodopsin trafficking defects**

641 Panels show immunohistochemical analysis of dorsal retinas from wild-type (top),  
642 *cep290<sup>fh297/fh297</sup>* (middle), and *cep290<sup>fh297/fh297</sup>;*cc2d2a*<sup>+/-</sup>* mutants (bottom) at 6 months of age  
643 stained with (A) PNA (red) and Zpr-1 (green) to label cone photoreceptor; (B) Zpr-3 to label  
644 rhodopsin; or (C) GRK1 to label rhodopsin kinase. ROS, rod outer segments; COS, cone outer  
645 segments; ONL, outer nuclear layer; OPL, outer plexiform layer; INL, inner nuclear layer; IPL,  
646 inner plexiform layer; RGC, retinal ganglion cells. Scale bar: 50  $\mu$ m. (D) Quantification of cone  
647 outer segment density or (E) rhodopsin mislocalization from the indicated genotypes at 6  
648 months of age. See methods section for details on quantification. Removing one allele of  
649 *cc2d2a* from a *cep290<sup>fh297/fh297</sup>* mutant background had no effect on cone degeneration or  
650 rhodopsin mislocalization. At least 10 unique fish over at least 2 independent experiments were  
651 evaluated.  $***P < 0.0005$ ;  $****P < 0.0001$  as determined by a 1-way ANOVA with a Multiple  
652 Comparisons test and Tukey corrections. Data represented as means  $\pm$  s.e.m.

653

654 **Figure 13. Combined loss of *cep290* and *arl13b* does not exacerbate cone degeneration**  
655 **or rhodopsin trafficking defects**

656 Panels show immunohistochemical analysis of dorsal retinas from wild-type (top),  
657 *cep290<sup>fh297/fh297</sup>* (middle), and *cep290<sup>fh297/fh297</sup>;*arl13b*<sup>+/-</sup>* mutants (bottom) at 6 months of age  
658 stained with (A) PNA (red) and Zpr-1 (green) to label cone photoreceptor; (B) Zpr-3 to label  
659 rhodopsin; or (C) GRK1 to label rhodopsin kinase. ROS, rod outer segments; COS, cone outer  
660 segments; ONL, outer nuclear layer; OPL, outer plexiform layer; INL, inner nuclear layer; IPL,  
661 inner plexiform layer; RGC, retinal ganglion cells. Scale bar: 50  $\mu$ m. (D) Quantification of cone  
662 outer segment density or (E) rhodopsin mislocalization from the indicated genotypes at 6  
663 months of age. See methods section for details on quantification. Removing one allele of  
664 *arl13b* from a *cep290<sup>fh297/fh297</sup>* mutant background had no effect on cone degeneration or  
665 rhodopsin mislocalization. At least 5 unique fish over at least 2 independent experiments were  
666 evaluated.  $**P < 0.001$ ;  $***P < 0.0005$ ;  $****P < 0.0001$  as determined by a 1-way ANOVA with  
667 a Multiple Comparisons test and Tukey corrections. Data represented as means  $\pm$  s.e.m.

668

669

670 Finally, we asked if visual function of *cep290<sup>fh297/fh297</sup>* mutant larvae could be diminished

671 by the additional loss of one allele of *ahi1*, *cc2d2a*, or *arl13b*. We performed pairwise crosses of

672 *cep290<sup>+/fh297</sup>;*ahi1*<sup>+/-</sup>*, *cep290<sup>+/fh297</sup>;*cc2d2a*<sup>+/-</sup>*, or *cep290<sup>+/fh297</sup>;*arl13b*<sup>+/-</sup>* adults and measured the

673 OKR gain for both contrast sensitivity and visual acuity for all offspring at 5 dpf and

674 subsequently determine the genotype for each animal (Fig. 14). We previously reported that

675 *ahi1<sup>-/-</sup>* mutants have disrupted photoreceptor outer segments but do exhibit normal visual

676 behavior [40]. Although the *cep290<sup>fh297/fh297</sup>;*ahi1*<sup>+/-</sup>* mutants had no measurable defect in

677 contrast sensitivity responses (Fig. 14A), a significant reduction in spatial resolution

678 discrimination was observed (Fig. 14B). Interestingly, the *cep290<sup>fh297/fh297</sup>;cc2d2a<sup>+/-</sup>* mutants had  
679 no measurable defect in either contrast sensitivity or spatial resolution responses, although the  
680 *cep290<sup>fh297/fh297</sup>;cc2d2a<sup>-/-</sup>* mutants were more significantly affected (Figs. 14C and D). The  
681 *arl13b<sup>-/-</sup>* single mutants showed significant impairment of both contrast sensitivity and spatial  
682 frequency discrimination (Figs. 14 E, F). Although the *cep290<sup>fh297/fh297</sup>;arl13b<sup>+/-</sup>* mutants were not  
683 statistically different from *cep290<sup>fh297/fh297</sup>* single mutants in contrast sensitivity, there was a  
684 statistically significant difference between *cep290<sup>fh297/fh297</sup>* single mutants and  
685 *cep290<sup>fh297/fh297</sup>;arl13b<sup>+/-</sup>* mutants in spatial resolution (Fig. 14F, purple bar). Interestingly,  
686 removing one allele of *cep290* significantly enhanced the defects in both contrast sensitivity and  
687 spatial frequency of *arl13b<sup>-/-</sup>* mutants (Figs. 14E, F; blue bars). Taken together, these results  
688 suggest that loss of *cep290* is differentially sensitive to the loss of one allele of *ahi1*, *arl13b*, and  
689 *cc2d2a*. The data also suggest that in zebrafish, *arl13b* may not function as a modifier of  
690 *cep290*, but *cep290* may instead function as a modifier of *arl13b* in zebrafish. We did not  
691 include results from double homozygous mutants because this may reflect an additive effect  
692 from two independent phenotypes rather than a true modifier effect. Furthermore, the likelihood  
693 that both genes carry two mutant alleles is a highly unlikely to occur in humans with retina  
694 disease.

695 **Figure 14. Loss of *ahi1* or *arl13b* impairs visual function of *cep290<sup>fh297/fh297</sup>* mutants**  
696 (A, C, E) OKR contrast response function of 5 dpf larvae (left) and bar graph (right) of  
697 corresponding data points at the 70% contrast setting (hatched box). (B, D, F) OKR spatial  
698 resolution results of 5 dpf larvae (left) and bar graph of corresponding data points at the 0.039  
699 spatial frequency (hatched box). Genotypes are indicated in the legend and in the X-axes.  
700 Inset values indicate the total number larvae tested for each genotype. \*  $P < 0.05$ ; \*\*  $P < 0.01$ ;  
701 \*\*\*  $P < 0.001$ ; \*\*\*\*  $P < 0.0001$  as determined by a 2-way ANOVA with a Multiple Comparisons  
702 test and Tukey corrections. Data are presented as means  $\pm$  s.e.m.

## 703 DISCUSSION

704 Mutation of *CEP290* is a major cause of ciliopathies and non-syndromic retinal  
705 degeneration. *CEP290* mutations result in a variety of disorders with overlapping but clinically  
706 distinct phenotypes and significant phenotypic variation exists between patients diagnosed with  
707 the same syndrome. For example, the best corrected visual acuity of several LCA patients with  
708 *CEP290* mutations varied from 20/50 to the absence of light perception [9]. The cause of this  
709 variation is often attributed to the presence of mutations in second-site modifier genes [33, 71].  
710 Several reports have confirmed a role for modifier genes. For example, an allele of *RPGRIP1L*  
711 enhances retinal degeneration across a spectrum of ciliopathies [29] and mutations in *AHI1*  
712 were suggested to increase the severity of photoreceptor degeneration in nephronophthisis  
713 patients [72]. The effect of genetic modifiers on *Cep290* phenotypes has been less clear. In  
714 humans, mutations in *AHI1* and *CC2D2A* cause JBTS and both genes have been proposed as  
715 potential modifiers of *CEP290* [12, 33]. Missense alleles of *AHI1* were associated with  
716 increased neurological involvement in a small number of *CEP290*-LCA patients [33], while  
717 morpholino knockdown of *cep290* increased the frequency of kidney cysts in *cc2d2a*<sup>-/-</sup> mutant  
718 zebrafish [12]. The absence of one *Bbs4* allele enhanced photoreceptor degeneration in  
719 *Cep290*<sup>rd16/rd16</sup> mice [71]. However, mutation of a single allele of *Bbs6* (*Mkks*) rescued the  
720 photoreceptor degeneration of *Cep290*<sup>rd16/rd16</sup> mice [73]. Taken together, these data imply that  
721 genetic interactions can exert gene- or even allele-specific effects.

722 In this study, we report that the zebrafish *cep290*<sup>fh297/fh297</sup> mutant retina undergoes  
723 progressive cone photoreceptor degeneration beginning at 3 months of age and is accompanied  
724 of rhodopsin mislocalization and thinning of the outer nuclear layer by 6 months of age. Retinal  
725 development occurs normally and the *cep290*<sup>fh297/fh297</sup> mutants have normal visual acuity as  
726 larvae. This is not inconsistent with clinical studies of LCA patients with point mutations in  
727 *CEP290*. Younger patients are more likely to have a normal fundus appearance, with older  
728 patients showing white flecks or pigmentary retinopathy [8, 33]. These observations indicate that

729 in humans, photoreceptor development is preserved while the long-term photoreceptor survival  
730 is affected, similar to what is observed in the *cep290<sup>fh297/fh297</sup>* mutant.

731 We also investigated how heterozygous mutations in the *ahi1*, *arl13b*, or *cc2d2a* genes  
732 impacted retinal architecture and visual function of *cep290<sup>fh297/fh297</sup>* mutants. Compared to  
733 *cep290<sup>fh297/fh297</sup>* mutants, we found that the absence of one allele of these genes did not  
734 accelerate retinal degeneration or reduce viability on a *cep290<sup>fh297/fh297</sup>* mutant background.  
735 However, loss of one allele of *ahi1* or *arl13b* did decrease the spacial frequency function of  
736 *cep290<sup>fh297/fh297</sup>* mutants while the *cep290<sup>fh297/fh297</sup>;cc2d2a<sup>+/-</sup>* mutants were indistinguishable from  
737 *cep290<sup>fh297/fh297</sup>* mutants. We therefore conclude that the retinal phenotypes in zebrafish lacking  
738 *cep290* are differentially sensitive to the loss of one allele of *ahi1*, *arl13b*, or *cc2d2a*. These  
739 experiments were prompted by a previous study of zebrafish *cc2d2a<sup>-/-</sup>* mutants that found that  
740 injection of morpholinos targeting *cep290* significantly increased the frequency of pronephric  
741 cysts at 4 dpf [12], thereby indicating a potential genetic interaction between *cc2d2a* and  
742 *cep290* in zebrafish. In a separate report, morpholino-induced knockdown of *cep290* in  
743 zebrafish also prevented photoreceptor outer segment formation and other ciliopathy defects  
744 [74]. We rarely observed pronephric cysts in *cep290<sup>fh297/fh297</sup>* mutants and the frequency of cysts  
745 was not increased by the additional loss of *cc2d2a*, consistent with the lack of genetic  
746 interactions in the eye. These contrasting results may reflect the observed differences observed  
747 between morpholino-induced phenotypes and mutant phenotypes. Such differences have been  
748 attributed to off-target effects of morpholinos or genetic compensation by mutants but not  
749 morphants [75, 76].

750 The slow photoreceptor degeneration observed in the zebrafish *cep290<sup>fh297/fh297</sup>* mutant  
751 differs from the phenotypes observed in mice lacking *Cep290*. The *cep290<sup>rd16</sup>* mouse  
752 undergoes almost complete loss of rods within 4 weeks of age [20], while a complete knockout  
753 of *Cep290* is embryonic lethal [14]. Although the *cep290<sup>fh297</sup>* allele encodes a nonsense  
754 mutation, mutant *cep290* transcripts were downregulated by 55% compared to wild-type levels.

755 This is similar to what has been observed in human tissues. Fibroblasts derived from an LCA  
756 patient with the c.2991+1665A>G mutation had a 60% reduction in wild-type *CEP290*  
757 transcripts that resulted in a corresponding ~80% reduction in protein levels [43]. A recent  
758 study determined that iPSC-derived RPE from a patient with biallelic truncating mutations in  
759 *CEP290* maintained protein expression at levels at least 10% of wild-type expression [77].  
760 Furthermore, *CEP290*-LCA patients carrying two nonsense alleles do not undergo the rapid  
761 photoreceptor degeneration observed in *Cep290*<sup>rd16/rd16</sup> mice or the increased mortality of the  
762 *Cep290*<sup>ko/ko</sup> mice [8, 21]. Several possibilities exist that could explain these differences. It is  
763 possible that truncating mutations are subject to exon skipping in humans, thus leading to partial  
764 protein production [25]. Exon skipping was not detected in *cep290* transcripts in the zebrafish  
765 retina, but perhaps retinal cells differ from other somatic cells in their sensitivity to mutations in  
766 the *Cep290* gene. We acknowledge that the effect of the *fh297* mutation on protein production  
767 in zebrafish remains unknown. Despite multiple attempts with both commercial antibodies [41]  
768 and custom-designed antibodies [42], we were unable to detect *Cep290* protein in lysates of  
769 wild-type or *cep290* mutants by immunoblotting, so the possibility that the mutated gene  
770 produces a truncated polypeptide with partial function cannot be excluded. Such partial and  
771 truncated polypeptides may also exist in humans with nonsense mutations.

772         Despite the loss of cone photoreceptors, the rod outer segments appear preserved.  
773 Zebrafish typically show a robust capacity to regenerate damaged photoreceptors following  
774 acute damage such as intense light exposure, mechanical injury, or chemical-induced toxicity  
775 [70, 78-80], but few studies have directly examined whether adult zebrafish have the capacity to  
776 regenerate photoreceptors in a model of inherited retinal degeneration. Following retina injury,  
777 the Müller glia within the INL undergo a reprogramming event and proliferate as retinal stem  
778 cells to regenerate lost neurons. Immunohistochemical analyses with proliferating cell nuclear  
779 antigen (PNCA) found a small increase in proliferating cells in the INL of *cep290*<sup>fh297/fh297</sup>  
780 mutants, but a significant increase in proliferating cells was seen in the ONL, which have been

781 shown to be rod precursors [69, 81, 82]. It is possible that rods do undergo a slow degeneration  
782 in the *cep290<sup>fh297/fh297</sup>* mutants but the dying rods are being continually replaced from the rod  
783 progenitor population in the ONL. Because the Müller cells are not proliferative, cone  
784 regeneration does not occur. This obviously raises several intriguing questions about how the  
785 zebrafish retina differentially responds to acute injury versus a progressive hereditary  
786 degeneration.

787         Zebrafish *cep290* mutants survive to adulthood and reinforce the important role of  
788 Cep290 in photoreceptor outer segment maintenance. Furthermore the *cep290<sup>fh297/fh297</sup>* mutant  
789 represents a model for slow retinal degeneration that mimics the ocular involvement of *CEP290*-  
790 dependent LCA and provides a unique platform to screen for genetic modifiers that accelerate  
791 or prevent photoreceptor degeneration. In addition, future work with this model can provide  
792 insight into the mechanisms required to trigger photoreceptor regeneration in zebrafish and the  
793 signaling pathways required to regenerate lost photoreceptors in *CEP290* patients.

794  
795

796 **Acknowledgments**

797

798 The authors would like to thank Dr. Iain Drummond from Massachusetts General Hospital and  
799 members of the Perkins lab for helpful discussions. This work was supported by the National  
800 Institutes of Health [NIH R01-EY017037 to B.D.P., NIH P30-EY025585 to Cole Eye Institute];  
801 and the Research to Prevent Blindness [Doris and Jules Stein Professorship to B.D.P.].

802 **Author Contribution**

803

804 E. M. Lessieur and B. D. Perkins designed research and analyzed data. E. M. Lessieur, P.  
805 Song, G. C. Nivar, J. Fogerty, E. M. Piccillo, R. Rozic and B. D. Perkins performed research. E.  
806 M. Lessieur and B. D. Perkins wrote the paper. The authors have no conflicts to declare.



## References

1. Hildebrandt F, Benzing T, Katsanis N. Ciliopathies. *N Engl J Med*. 2011;364(16):1533-43. Epub 2011/04/22. doi: 10.1056/NEJMra1010172. PubMed PMID: 21506742.
2. Sharma N, Barbari NF, Yoder BK. Ciliary dysfunction in developmental abnormalities and diseases. *Curr Top Dev Biol*. 2008;85:371-427. Epub 2009/01/17. doi: S0070-2153(08)00813-2 [pii]  
10.1016/S0070-2153(08)00813-2. PubMed PMID: 19147012.
3. Rachel RA, Li T, Swaroop A. Photoreceptor sensory cilia and ciliopathies: focus on CEP290, RPGR and their interacting proteins. *Cilia*. 2012;1(1):22. doi: 10.1186/2046-2530-1-22. PubMed PMID: 23351659; PubMed Central PMCID: PMC3563624.
4. den Hollander AI, Koenekoop RK, Yzer S, Lopez I, Arends ML, Voeselek KE, et al. Mutations in the CEP290 (NPHP6) gene are a frequent cause of Leber congenital amaurosis. *Am J Hum Genet*. 2006;79(3):556-61. Epub 2006/08/16. doi: S0002-9297(07)62755-4 [pii]  
10.1086/507318. PubMed PMID: 16909394; PubMed Central PMCID: PMC1559533.
5. den Hollander AI, Roepman R, Koenekoop RK, Cremers FP. Leber congenital amaurosis: genes, proteins and disease mechanisms. *Prog Retin Eye Res*. 2008;27(4):391-419. Epub 2008/07/18. doi: S1350-9462(08)00036-0 [pii]  
10.1016/j.preteyeres.2008.05.003. PubMed PMID: 18632300.
6. Coppieters F, Lefever S, Leroy BP, De Baere E. CEP290, a gene with many faces: mutation overview and presentation of CEP290base. *Hum Mutat*. 2010;31(10):1097-108. doi: 10.1002/humu.21337. PubMed PMID: 20690115.
7. Bachmann-Gagescu R, Dempsey JC, Phelps IG, O'Roak BJ, Knutzen DM, Rue TC, et al. Joubert syndrome: a model for untangling recessive disorders with extreme genetic heterogeneity. *J Med Genet*. 2015;52(8):514-22. doi: 10.1136/jmedgenet-2015-103087. PubMed PMID: 26092869.
8. Sheck L, Davies WIL, Moradi P, Robson AG, Kumaran N, Liasis AC, et al. Leber Congenital Amaurosis Associated with Mutations in CEP290, Clinical Phenotype, and Natural History in Preparation for Trials of Novel Therapies. *Ophthalmology*. 2018. doi: 10.1016/j.ophtha.2017.12.013. PubMed PMID: 29398085.
9. Cideciyan AV, Aleman TS, Jacobson SG, Khanna H, Sumaroka A, Aguirre GK, et al. Centrosomal-ciliary gene CEP290/NPHP6 mutations result in blindness with unexpected sparing of photoreceptors and visual brain: implications for therapy of Leber congenital amaurosis. *Hum Mutat*. 2007;28(11):1074-83. Epub 2007/06/08. doi: 10.1002/humu.20565. PubMed PMID: 17554762.
10. Pasadhika S, Fishman GA, Stone EM, Lindeman M, Zelkha R, Lopez I, et al. Differential macular morphology in patients with RPE65-, CEP290-, GUCY2D-, and AIPL1-related Leber congenital amaurosis. *Invest Ophthalmol Vis Sci*. 2010;51(5):2608-14. doi: 10.1167/iovs.09-3734. PubMed PMID: 19959640; PubMed Central PMCID: PMC3568490.

11. Yzer S, Hollander AI, Lopez I, Pott JW, de Faber JT, Cremers FP, et al. Ocular and extra-ocular features of patients with Leber congenital amaurosis and mutations in CEP290. *Mol Vis.* 2012;18:412-25. PubMed PMID: 22355252; PubMed Central PMCID: PMC3283211.
12. Gorden NT, Arts HH, Parisi MA, Coene KL, Letteboer SJ, van Beersum SE, et al. CC2D2A is mutated in Joubert syndrome and interacts with the ciliopathy-associated basal body protein CEP290. *Am J Hum Genet.* 2008;83(5):559-71. Epub 2008/10/28. doi: S0002-9297(08)00536-3 [pii]
- 10.1016/j.ajhg.2008.10.002. PubMed PMID: 18950740; PubMed Central PMCID: PMC2668034.
13. Schouteden C, Serwas D, Palfy M, Dammermann A. The ciliary transition zone functions in cell adhesion but is dispensable for axoneme assembly in *C. elegans*. *J Cell Biol.* 2015;210(1):35-44. doi: 10.1083/jcb.201501013. PubMed PMID: 26124290; PubMed Central PMCID: PMC4493997.
14. Rachel RA, Yamamoto EA, Dewanjee MK, May-Simera HL, Sergeev YV, Hackett AN, et al. CEP290 alleles in mice disrupt tissue-specific cilia biogenesis and recapitulate features of syndromic ciliopathies. *Hum Mol Genet.* 2015;24(13):3775-91. doi: 10.1093/hmg/ddv123. PubMed PMID: 25859007; PubMed Central PMCID: PMC4459394.
15. Besharse JC, Horst CJ. The photoreceptor connecting cilium. A model for the transition zone. In: Bloodgood RA, editor. *Ciliary and Flagellar Membranes*. New York: Plenum Publishing Corp.; 1990. p. 389-417.
16. Datta P, Allamargot C, Hudson JS, Andersen EK, Bhattarai S, Drack AV, et al. Accumulation of non-outer segment proteins in the outer segment underlies photoreceptor degeneration in Bardet-Biedl syndrome. *Proc Natl Acad Sci U S A.* 2015;112(32):E4400-9. doi: 10.1073/pnas.1510111112. PubMed PMID: 26216965; PubMed Central PMCID: PMC4538681.
17. Li C, Jensen VL, Park K, Kennedy J, Garcia-Gonzalo FR, Romani M, et al. MKS5 and CEP290 Dependent Assembly Pathway of the Ciliary Transition Zone. *PLoS biology.* 2016;14(3):e1002416. doi: 10.1371/journal.pbio.1002416. PubMed PMID: 26982032; PubMed Central PMCID: PMC4794247.
18. Garcia-Gonzalo FR, Corbit KC, Sirerol-Piquer MS, Ramaswami G, Otto EA, Noriega TR, et al. A transition zone complex regulates mammalian ciliogenesis and ciliary membrane composition. *Nat Genet.* 2011;43(8):776-84. Epub 2011/07/05. doi: 10.1038/ng.891
- ng.891 [pii]. PubMed PMID: 21725307; PubMed Central PMCID: PMC3145011.
19. Murga-Zamalloa CA, Ghosh AK, Patil SB, Reed NA, Chan LS, Davuluri S, et al. Accumulation of the Raf-1 kinase inhibitory protein (Rkip) is associated with Cep290-mediated photoreceptor degeneration in ciliopathies. *J Biol Chem.* 2011;286(32):28276-86. doi: 10.1074/jbc.M111.237560. PubMed PMID: 21685394; PubMed Central PMCID: PMC3151072.
20. Chang B, Khanna H, Hawes N, Jimeno D, He S, Lillo C, et al. In-frame deletion in a novel centrosomal/ciliary protein CEP290/NPHP6 perturbs its interaction with RPGR and results in early-onset retinal degeneration in the rd16 mouse. *Hum Mol Genet.* 2006;15(11):1847-57. Epub 2006/04/25. doi: ddl107 [pii]

10.1093/hmg/ddl107. PubMed PMID: 16632484.

21. Cideciyan AV, Rachel RA, Aleman TS, Swider M, Schwartz SB, Sumaroka A, et al. Cone photoreceptors are the main targets for gene therapy of NPHP5 (IQCB1) or NPHP6 (CEP290) blindness: generation of an all-cone Nphp6 hypomorph mouse that mimics the human retinal ciliopathy. *Hum Mol Genet.* 2011;20(7):1411-23. doi: 10.1093/hmg/ddr022. PubMed PMID: 21245082; PubMed Central PMCID: PMC3049361.

22. Menotti-Raymond M, David VA, Pflueger S, Roelke ME, Kehler J, O'Brien SJ, et al. Widespread retinal degenerative disease mutation (rdAc) discovered among a large number of popular cat breeds. *Vet J.* 2010;186(1):32-8. doi: 10.1016/j.tvjl.2009.08.010. PubMed PMID: 19747862.

23. Menotti-Raymond M, David VA, Schaffer AA, Stephens R, Wells D, Kumar-Singh R, et al. Mutation in CEP290 discovered for cat model of human retinal degeneration. *The Journal of heredity.* 2007;98(3):211-20. doi: 10.1093/jhered/esm019. PubMed PMID: 17507457.

24. Barny I, Perrault I, Michel C, Soussan M, Goudin N, Rio M, et al. Basal exon skipping and nonsense-associated altered splicing allows bypassing complete CEP290 loss-of-function in individuals with unusually mild retinal disease. *Hum Mol Genet.* 2018. Epub 2018/05/18. doi: 10.1093/hmg/ddy179. PubMed PMID: 29771326.

25. Drivas TG, Wojno AP, Tucker BA, Stone EM, Bennett J. Basal exon skipping and genetic pleiotropy: A predictive model of disease pathogenesis. *Sci Transl Med.* 2015;7(291):291ra97. doi: 10.1126/scitranslmed.aaa5370. PubMed PMID: 26062849; PubMed Central PMCID: PMC4486480.

26. Williams CL, Li C, Kida K, Inglis PN, Mohan S, Semene L, et al. MKS and NPHP modules cooperate to establish basal body/transition zone membrane associations and ciliary gate function during ciliogenesis. *J Cell Biol.* 2011;192(6):1023-41. doi: 10.1083/jcb.201012116. PubMed PMID: 21422230; PubMed Central PMCID: PMC3063147.

27. Huang L, Szymanska K, Jensen VL, Janecke AR, Innes AM, Davis EE, et al. TMEM237 is mutated in individuals with a Joubert syndrome related disorder and expands the role of the TMEM family at the ciliary transition zone. *Am J Hum Genet.* 2011;89(6):713-30. doi: 10.1016/j.ajhg.2011.11.005. PubMed PMID: 22152675; PubMed Central PMCID: PMC3234373.

28. Yee LE, Garcia-Gonzalo FR, Bowie RV, Li C, Kennedy JK, Ashrafi K, et al. Conserved Genetic Interactions between Ciliopathy Complexes Cooperatively Support Ciliogenesis and Ciliary Signaling. *PLoS Genet.* 2015;11(11):e1005627. doi: 10.1371/journal.pgen.1005627. PubMed PMID: 26540106; PubMed Central PMCID: PMC4635004.

29. Khanna H, Davis EE, Murga-Zamalloa CA, Estrada-Cuzcano A, Lopez I, den Hollander AI, et al. A common allele in RPGRIP1L is a modifier of retinal degeneration in ciliopathies. *Nat Genet.* 2009. Epub 2009/05/12. doi: ng.366 [pii]

10.1038/ng.366. PubMed PMID: 19430481.

30. Sang L, Miller JJ, Corbit KC, Giles RH, Brauer MJ, Otto EA, et al. Mapping the NPHP-JBTS-MKS protein network reveals ciliopathy disease genes and pathways. *Cell.*

2011;145(4):513-28. doi: 10.1016/j.cell.2011.04.019. PubMed PMID: 21565611; PubMed Central PMCID: PMCPMC3383065.

31. Winkelbauer ME, Schafer JC, Haycraft CJ, Swoboda P, Yoder BK. The *C. elegans* homologs of nephrocystin-1 and nephrocystin-4 are cilia transition zone proteins involved in chemosensory perception. *J Cell Sci.* 2005;118(Pt 23):5575-87. PubMed PMID: 16291722.

32. Jensen VL, Li C, Bowie RV, Clarke L, Mohan S, Blacque OE, et al. Formation of the transition zone by Mks5/Rpgrip1L establishes a ciliary zone of exclusion (CIZE) that compartmentalises ciliary signalling proteins and controls PIP2 ciliary abundance. *EMBO J.* 2015;34(20):2537-56. doi: 10.15252/embj.201488044. PubMed PMID: 26392567; PubMed Central PMCID: PMCPMC4609185.

33. Coppieters F, Casteels I, Meire F, De Jaegere S, Hooghe S, van Regemorter N, et al. Genetic screening of LCA in Belgium: predominance of CEP290 and identification of potential modifier alleles in AHI1 of CEP290-related phenotypes. *Hum Mutat.* 2010. Epub 2010/08/05. doi: 10.1002/humu.21336. PubMed PMID: 20683928.

34. Dilan TL, Moye AR, Salido EM, Saravanan T, Saravanan K, Goldberg AFX, et al. ARL13B, a Joubert Syndrome-associated protein, is critical for retinogenesis and elaboration of mouse photoreceptor outer segments. *J Neurosci.* 2018. Epub 2018/12/24. doi: 10.1523/JNEUROSCI.1761-18.2018. PubMed PMID: 30573647.

35. Song P, Dudinsky L, Fogerty J, Gaivin R, Perkins BD. Arl13b Interacts With Vangl2 to Regulate Cilia and Photoreceptor Outer Segment Length in Zebrafish. *Invest Ophthalmol Vis Sci.* 2016;57(10):4517-26. doi: 10.1167/iovs.16-19898. PubMed PMID: 27571019; PubMed Central PMCID: PMCPMC5015978.

36. Larkins CE, Aviles GD, East MP, Kahn RA, Caspary T. Arl13b regulates ciliogenesis and the dynamic localization of Shh signaling proteins. *Mol Biol Cell.* 2011;22(23):4694-703. doi: 10.1091/mbc.E10-12-0994. PubMed PMID: 21976698; PubMed Central PMCID: PMC3226485.

37. Littink KW, Pott JW, Collin RW, Kroes HY, Verheij JB, Blokland EA, et al. A novel nonsense mutation in CEP290 induces exon skipping and leads to a relatively mild retinal phenotype. *Invest Ophthalmol Vis Sci.* 51(7):3646-52. Epub 2010/02/05. doi: iovs.09-5074 [pii] 10.1167/iovs.09-5074. PubMed PMID: 20130272.

38. Daniele LL, Emran F, Lobo GP, Gaivin RJ, Perkins BD. Mutation of wrb, a Component of the Guided Entry of Tail-Anchored Protein Pathway, Disrupts Photoreceptor Synapse Structure and Function. *Invest Ophthalmol Vis Sci.* 2016;57(7):2942-54. doi: 10.1167/iovs.15-18996. PubMed PMID: 27273592; PubMed Central PMCID: PMCPMC4898200.

39. Rinner O, Rick JM, Neuhauss SC. Contrast sensitivity, spatial and temporal tuning of the larval zebrafish optokinetic response. *Invest Ophthalmol Vis Sci.* 2005;46(1):137-42. PubMed PMID: 15623766.

40. Lessieur EM, Fogerty J, Gaivin RJ, Song P, Perkins BD. The Ciliopathy Gene *ahi1* Is Required for Zebrafish Cone Photoreceptor Outer Segment Morphogenesis and Survival. *Invest Ophthalmol Vis Sci.* 2017;58(1):448-60. doi: 10.1167/iovs.16-20326. PubMed PMID: 28118669; PubMed Central PMCID: PMCPMC5270624.

41. Mahuzier A, Gaude HM, Grampa V, Anselme I, Silbermann F, Leroux-Berger M, et al. Dishevelled stabilization by the ciliopathy protein Rpgrip1l is essential for planar cell polarity. *J Cell Biol.* 2012;198(5):927-40. doi: 10.1083/jcb.201111009. PubMed PMID: 22927466; PubMed Central PMCID: PMC3432770.
42. Bergboer JGM, Wyatt C, Austin-Tse C, Yaksi E, Drummond IA. Assaying sensory ciliopathies using calcium biosensor expression in zebrafish ciliated olfactory neurons. *Cilia.* 2018;7:2. doi: 10.1186/s13630-018-0056-1. PubMed PMID: 29568513; PubMed Central PMCID: PMC5856005.
43. Parfitt DA, Lane A, Ramsden CM, Carr AJ, Munro PM, Jovanovic K, et al. Identification and Correction of Mechanisms Underlying Inherited Blindness in Human iPSC-Derived Optic Cups. *Cell Stem Cell.* 2016;18(6):769-81. doi: 10.1016/j.stem.2016.03.021. PubMed PMID: 27151457; PubMed Central PMCID: PMC4899423.
44. Drivas TG, Holzbaur EL, Bennett J. Disruption of CEP290 microtubule/membrane-binding domains causes retinal degeneration. *J Clin Invest.* 2013;123(10):4525-39. doi: 10.1172/JCI69448. PubMed PMID: 24051377; PubMed Central PMCID: PMC3784542.
45. Barbelanne M, Song J, Ahmadzai M, Tsang WY. Pathogenic NPHP5 mutations impair protein interaction with Cep290, a prerequisite for ciliogenesis. *Hum Mol Genet.* 2013;22(12):2482-94. doi: 10.1093/hmg/ddt100. PubMed PMID: 23446637; PubMed Central PMCID: PMC3797088.
46. Krock BL, Perkins BD. The intraflagellar transport protein IFT57 is required for cilia maintenance and regulates IFT-particle-kinesin-II dissociation in vertebrate photoreceptors. *J Cell Sci.* 2008;121(Pt 11):1907-15. Epub 2008/05/22. doi: 10.1242/jcs.029397. PubMed PMID: 18492793.
47. Bachmann-Gagescu R, Phelps IG, Stearns G, Link BA, Brockerhoff SE, Moens CB, et al. The ciliopathy gene cc2d2a controls zebrafish photoreceptor outer segment development through a role in Rab8-dependent vesicle trafficking. *Hum Mol Genet.* 2011;20(20):4041-55. doi: 10.1093/hmg/ddr332. PubMed PMID: 21816947; PubMed Central PMCID: PMC3177654.
48. Grimes DT, Boswell CW, Morante NF, Henkelman RM, Burdine RD, Ciruna B. Zebrafish models of idiopathic scoliosis link cerebrospinal fluid flow defects to spine curvature. *Science.* 2016;352(6291):1341-4. doi: 10.1126/science.aaf6419. PubMed PMID: 27284198.
49. Helou J, Otto EA, Attanasio M, Allen SJ, Parisi MA, Glass I, et al. Mutation analysis of NPHP6/CEP290 in patients with Joubert syndrome and Senior-Loken syndrome. *J Med Genet.* 2007;44(10):657-63. doi: 10.1136/jmg.2007.052027. PubMed PMID: 17617513; PubMed Central PMCID: PMC2597962.
50. Wang J, Chang YF, Hamilton JI, Wilkinson MF. Nonsense-associated altered splicing: a frame-dependent response distinct from nonsense-mediated decay. *Mol Cell.* 2002;10(4):951-7. PubMed PMID: 12419238.
51. Maximov V, Maximova E, Damjanovic I, Maximov P. Detection and resolution of drifting gratings by motion detectors in the fish retina. *J Integr Neurosci.* 2013;12(1):117-43. doi: 10.1142/S0219635213500015. PubMed PMID: 23621461.

52. Purves D AG, Fitzpatrick D, et al. Neuroscience 2nd edition: Sunderland; 2001.
53. Saszik S, Bilotta J, Givin CM. ERG assessment of zebrafish retinal development. *Vis Neurosci*. 1999;16(5):881-8.
54. Bilotta J, Saszik S, Sutherland SE. Rod contributions to the electroretinogram of the dark-adapted developing zebrafish. *Dev Dyn*. 2001;222(4):564-70.
55. Vogalis F, Shiraki T, Kojima D, Wada Y, Nishiwaki Y, Jarvinen JL, et al. Ectopic expression of cone-specific G-protein-coupled receptor kinase GRK7 in zebrafish rods leads to lower photosensitivity and altered responses. *J Physiol*. 2011;589(Pt 9):2321-48. doi: 10.1113/jphysiol.2010.204156. PubMed PMID: 21486791; PubMed Central PMCID: PMC3098706.
56. Neuhauss SC, Biehlmaier O, Seeliger MW, Das T, Kohler K, Harris WA, et al. Genetic disorders of vision revealed by a behavioral screen of 400 essential loci in zebrafish. *J Neurosci*. 1999;19(19):8603-15.
57. Blanks JC, Johnson LV. Specific binding of peanut lectin to a class of retinal photoreceptor cells. A species comparison. *Invest Ophthalmol Vis Sci*. 1984;25(5):546-57. PubMed PMID: 6715128.
58. Ile KE, Kassen S, Cao C, Vihtehlic T, Shah SD, Mousley CJ, et al. Zebrafish class 1 phosphatidylinositol transfer proteins: P1TPbeta and double cone cell outer segment integrity in retina. *Traffic*. 2010;11(9):1151-67. Epub 2010/06/16. doi: TRA1085 [pii] 10.1111/j.1600-0854.2010.01085.x. PubMed PMID: 20545905; PubMed Central PMCID: PMC2919645.
59. Larison KD, Bremiller R. Early onset of phenotype and cell patterning in the embryonic zebrafish retina. *Development*. 1990;109(3):567-76.
60. Jensen VL, Leroux MR. Gates for soluble and membrane proteins, and two trafficking systems (IFT and LIFT), establish a dynamic ciliary signaling compartment. *Curr Opin Cell Biol*. 2017;47:83-91. Epub 2017/04/23. doi: 10.1016/j.ceb.2017.03.012. PubMed PMID: 28432921.
61. Zhang H, Li S, Doan T, Rieke F, Detwiler PB, Frederick JM, et al. Deletion of PrBP/delta impedes transport of GRK1 and PDE6 catalytic subunits to photoreceptor outer segments. *Proc Natl Acad Sci U S A*. 2007;104(21):8857-62. doi: 10.1073/pnas.0701681104. PubMed PMID: 17496142; PubMed Central PMCID: PMC1885592.
62. Schwarz N, Novoselova TV, Wait R, Hardcastle AJ, Cheetham ME. The X-linked retinitis pigmentosa protein RP2 facilitates G protein traffic. *Hum Mol Genet*. 2012;21(4):863-73. doi: 10.1093/hmg/ddr520. PubMed PMID: 22072390.
63. Zhang H, Hanke-Gogokhia C, Jiang L, Li X, Wang P, Gerstner CD, et al. Mistrafficking of prenylated proteins causes retinitis pigmentosa 2. *FASEB J*. 2015;29(3):932-42. doi: 10.1096/fj.14-257915. PubMed PMID: 25422369; PubMed Central PMCID: PMC4422365.
64. Liu F, Chen J, Yu S, Raghupathy RK, Liu X, Qin Y, et al. Knockout of RP2 decreases GRK1 and rod transducin subunits and leads to photoreceptor degeneration in zebrafish. *Hum Mol Genet*. 2015;24(16):4648-59. doi: 10.1093/hmg/ddv197. PubMed PMID: 26034134.

65. Wan J, Goldman D. Retina regeneration in zebrafish. *Curr Opin Genet Dev.* 2016;40:41-7. doi: 10.1016/j.gde.2016.05.009. PubMed PMID: 27281280; PubMed Central PMCID: PMC5135611.
66. Gorsuch RA, Hyde DR. Regulation of Muller glial dependent neuronal regeneration in the damaged adult zebrafish retina. *Exp Eye Res.* 2014;123:131-40. doi: 10.1016/j.exer.2013.07.012. PubMed PMID: 23880528; PubMed Central PMCID: PMC3877724.
67. Stenkamp DL. The rod photoreceptor lineage of teleost fish. *Prog Retin Eye Res.* 2011;30(6):395-404. doi: 10.1016/j.preteyeres.2011.06.004. PubMed PMID: 21742053; PubMed Central PMCID: PMC3196835.
68. Raymond PA, Rivlin PK. Germinal cells in the goldfish retina that produce rod photoreceptors. *Dev Biol.* 1987;122(1):120-38. PubMed PMID: 3596007.
69. Otteson DC, D'Costa AR, Hitchcock PF. Putative stem cells and the lineage of rod photoreceptors in the mature retina of the goldfish. *Dev Biol.* 2001;232(1):62-76.
70. Goldman D. Muller glial cell reprogramming and retina regeneration. *Nature reviews Neuroscience.* 2014;15(7):431-42. doi: 10.1038/nrn3723. PubMed PMID: 24894585; PubMed Central PMCID: PMC4249724.
71. Zhang Y, Seo S, Bhattarai S, Bugge K, Searby CC, Zhang Q, et al. BBS mutations modify phenotypic expression of CEP290-related ciliopathies. *Hum Mol Genet.* 2014;23(1):40-51. doi: 10.1093/hmg/ddt394. PubMed PMID: 23943788; PubMed Central PMCID: PMC3857943.
72. Louie CM, Caridi G, Lopes VS, Brancati F, Kispert A, Lancaster MA, et al. AHI1 is required for photoreceptor outer segment development and is a modifier for retinal degeneration in nephronophthisis. *Nat Genet.* 2010;42(2):175-80. doi: 10.1038/ng.519. PubMed PMID: 20081859; PubMed Central PMCID: PMC2884967.
73. Rachel RA, May-Simera HL, Veleri S, Gotoh N, Choi BY, Murga-Zamalloa C, et al. Combining Cep290 and Mkks ciliopathy alleles in mice rescues sensory defects and restores ciliogenesis. *J Clin Invest.* 2012;122(4):1233-45. Epub 2012/03/27. doi: 10.1172/JCI6098160981 [pii]. PubMed PMID: 22446187; PubMed Central PMCID: PMC3314468.
74. Murga-Zamalloa CA, Atkins SJ, Peranen J, Swaroop A, Khanna H. Interaction of retinitis pigmentosa GTPase regulator (RPGR) with RAB8A GTPase: implications for cilia dysfunction and photoreceptor degeneration. *Hum Mol Genet.* 2010;19(18):3591-8. doi: 10.1093/hmg/ddq275. PubMed PMID: 20631154; PubMed Central PMCID: PMC2928130.
75. Stainier DYR, Raz E, Lawson ND, Ekker SC, Burdine RD, Eisen JS, et al. Guidelines for morpholino use in zebrafish. *PLoS Genet.* 2017;13(10):e1007000. doi: 10.1371/journal.pgen.1007000. PubMed PMID: 29049395; PubMed Central PMCID: PMC5648102.
76. Rossi A, Kontarakis Z, Gerri C, Nolte H, Holper S, Kruger M, et al. Genetic compensation induced by deleterious mutations but not gene knockdowns. *Nature.* 2015;524(7564):230-3. doi: 10.1038/nature14580. PubMed PMID: 26168398.

77. May-Simera HL, Wan Q, Jha BS, Hartford J, Khristov V, Dejene R, et al. Primary Cilium-Mediated Retinal Pigment Epithelium Maturation Is Disrupted in Ciliopathy Patient Cells. *Cell reports*. 2018;22(1):189-205. doi: 10.1016/j.celrep.2017.12.038. PubMed PMID: 29298421.
78. Vihtelic TS, Hyde DR. Light-induced rod and cone cell death and regeneration in the adult albino zebrafish (*Danio rerio*) retina. *J Neurobiol*. 2000;44(3):289-307.
79. Maier W, Wolburg H. Regeneration of the goldfish retina after exposure to different doses of ouabain. *Cell Tissue Res*. 1979;202(1):99-118. PubMed PMID: 509506.
80. Raymond PA, Reifler MJ, Rivlin PK. Regeneration of goldfish retina: rod precursors are a likely source of regenerated cells. *Journal of neurobiology*. 1988;19(5):431-63. doi: 10.1002/neu.480190504. PubMed PMID: 3392530.
81. Johns PR, Fernald RD. Genesis of rods in teleost fish retina. *Nature*. 1981;293(5828):141-2.
82. Julian D, Ennis K, Korenbrot JI. Birth and fate of proliferative cells in the inner nuclear layer of the mature fish retina. *J Comp Neurol*. 1998;394(3):271-82. PubMed PMID: 9579393.



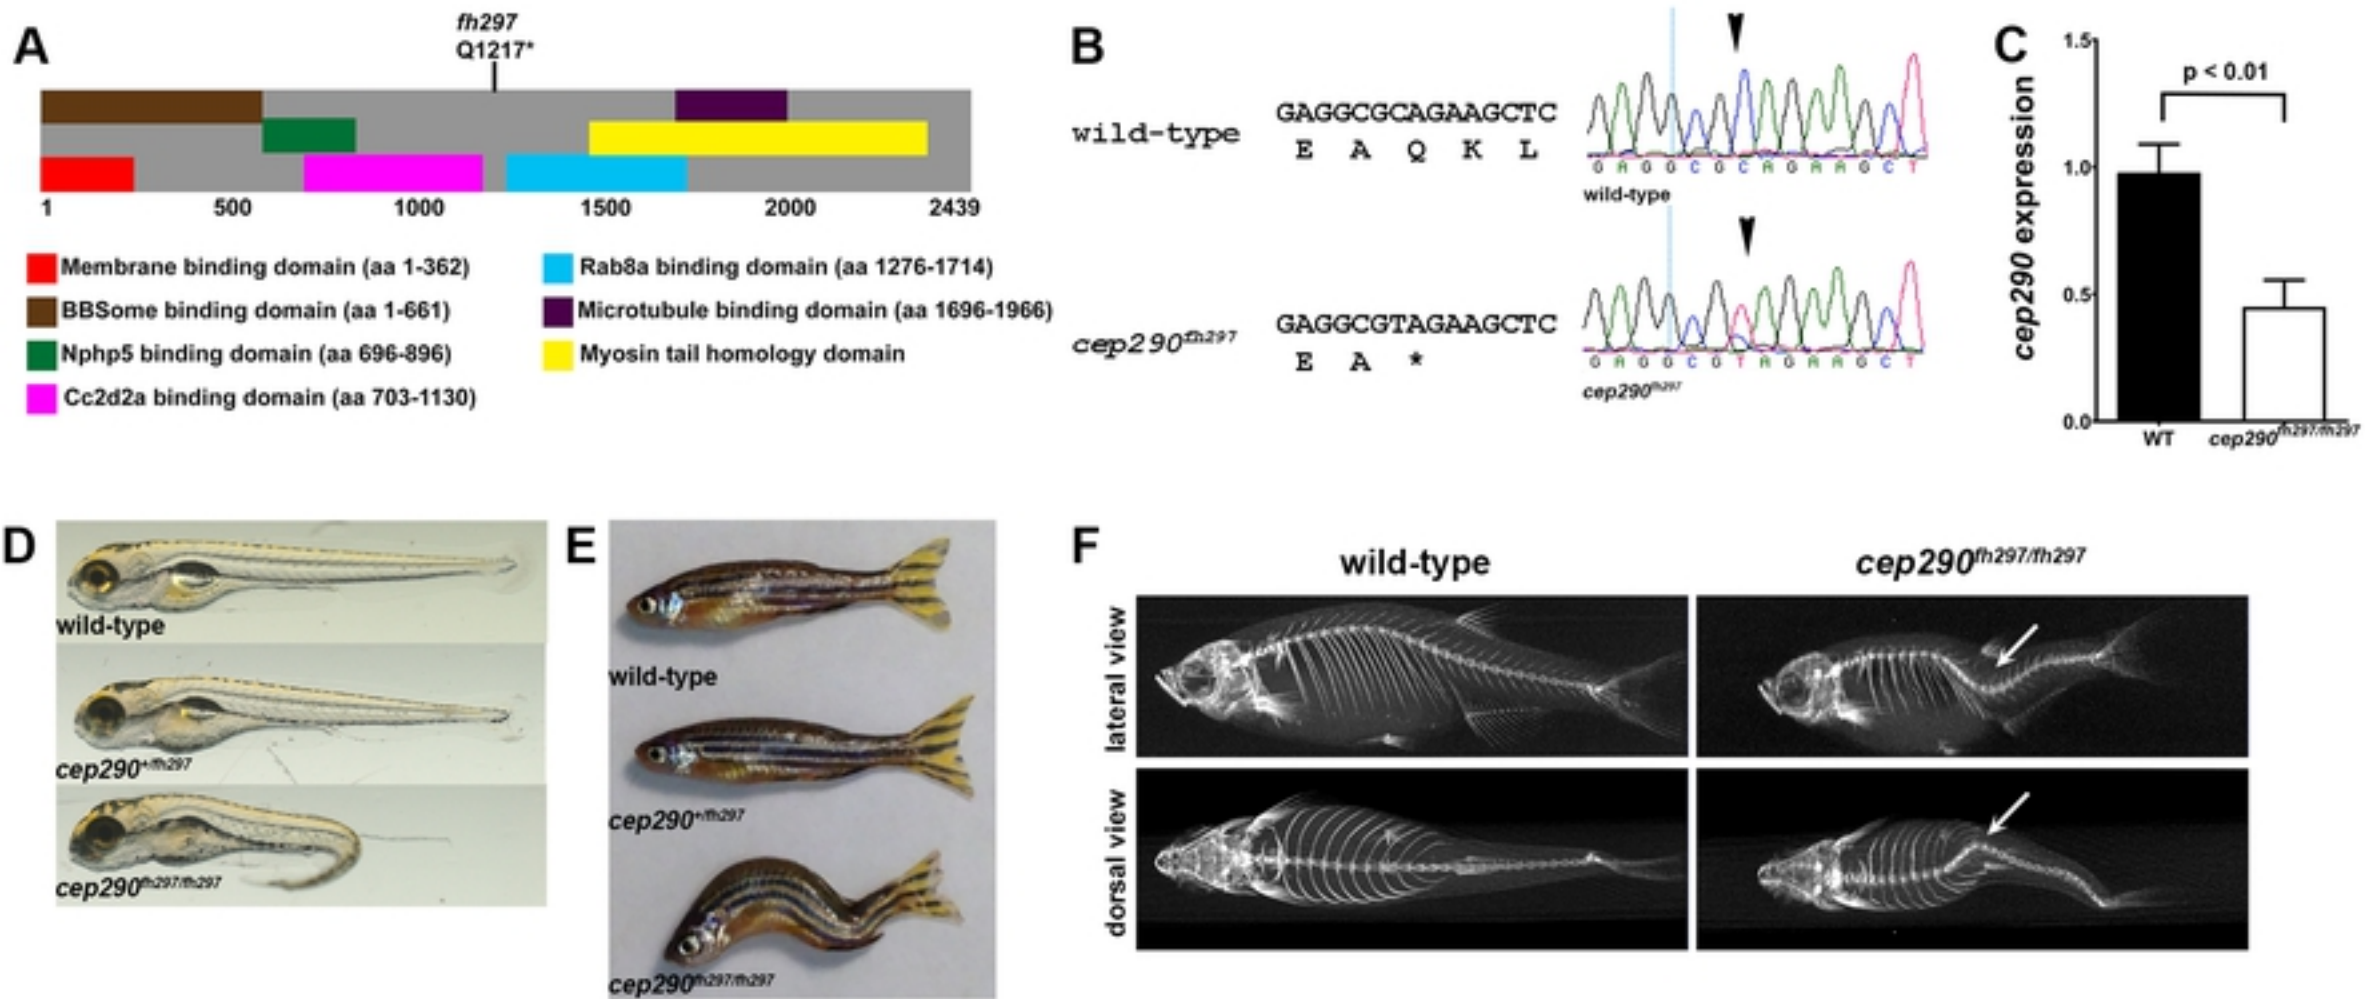

Figure 1

**A***cep290*<sup>fh297/fh297</sup>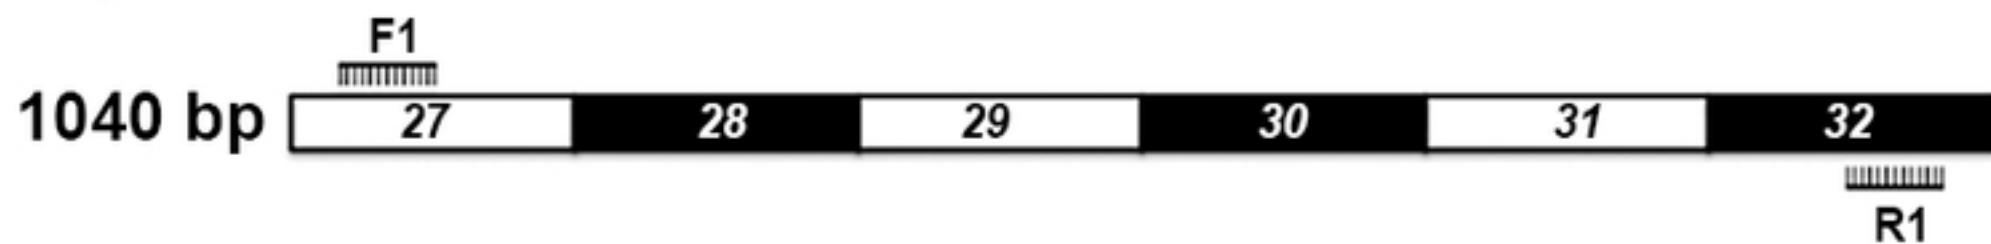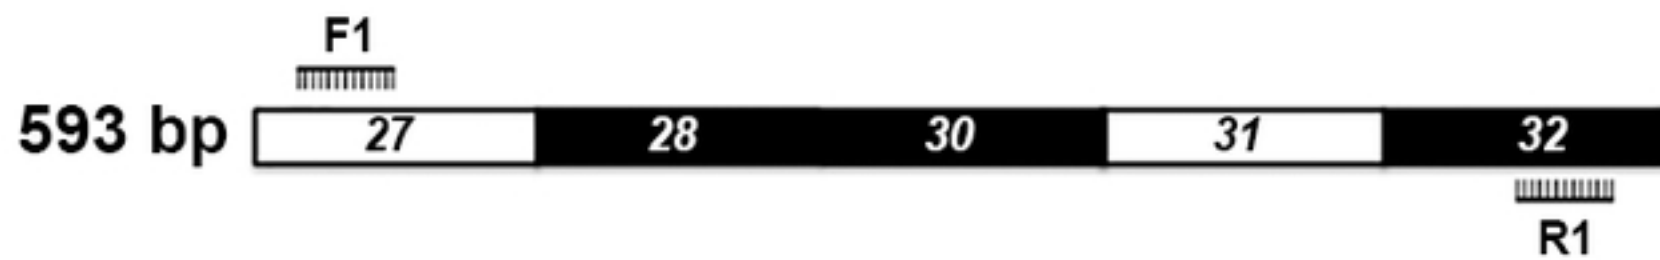**B**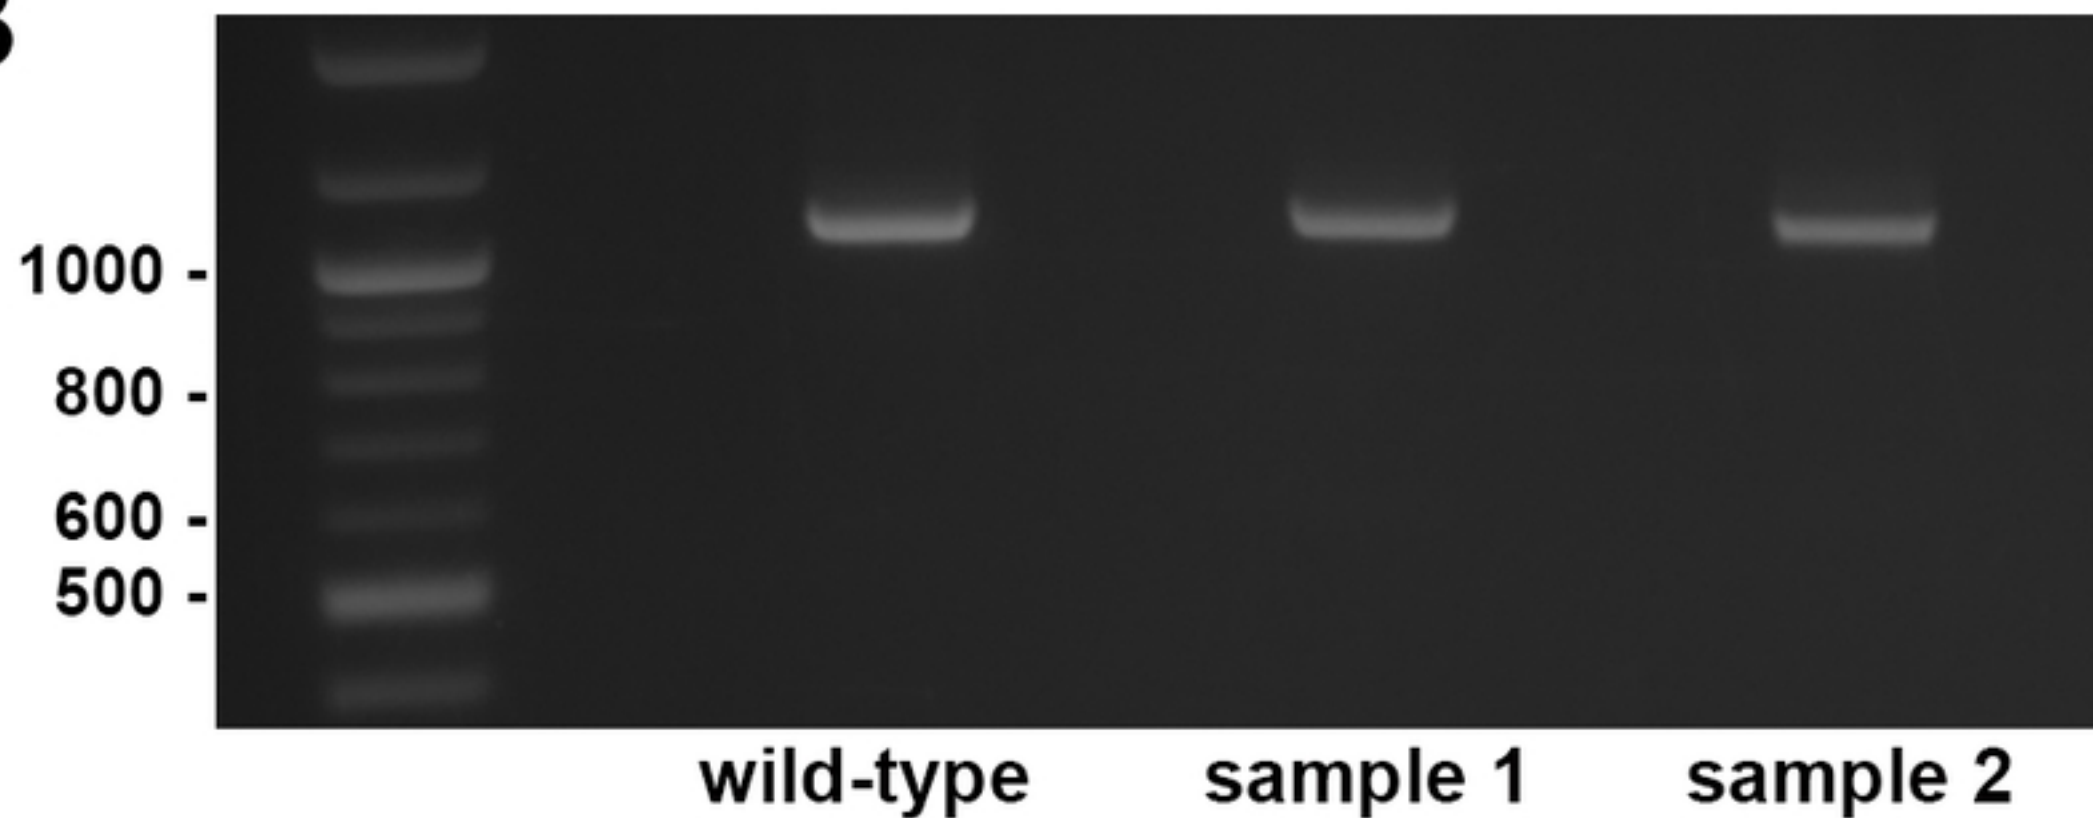

Figure 2

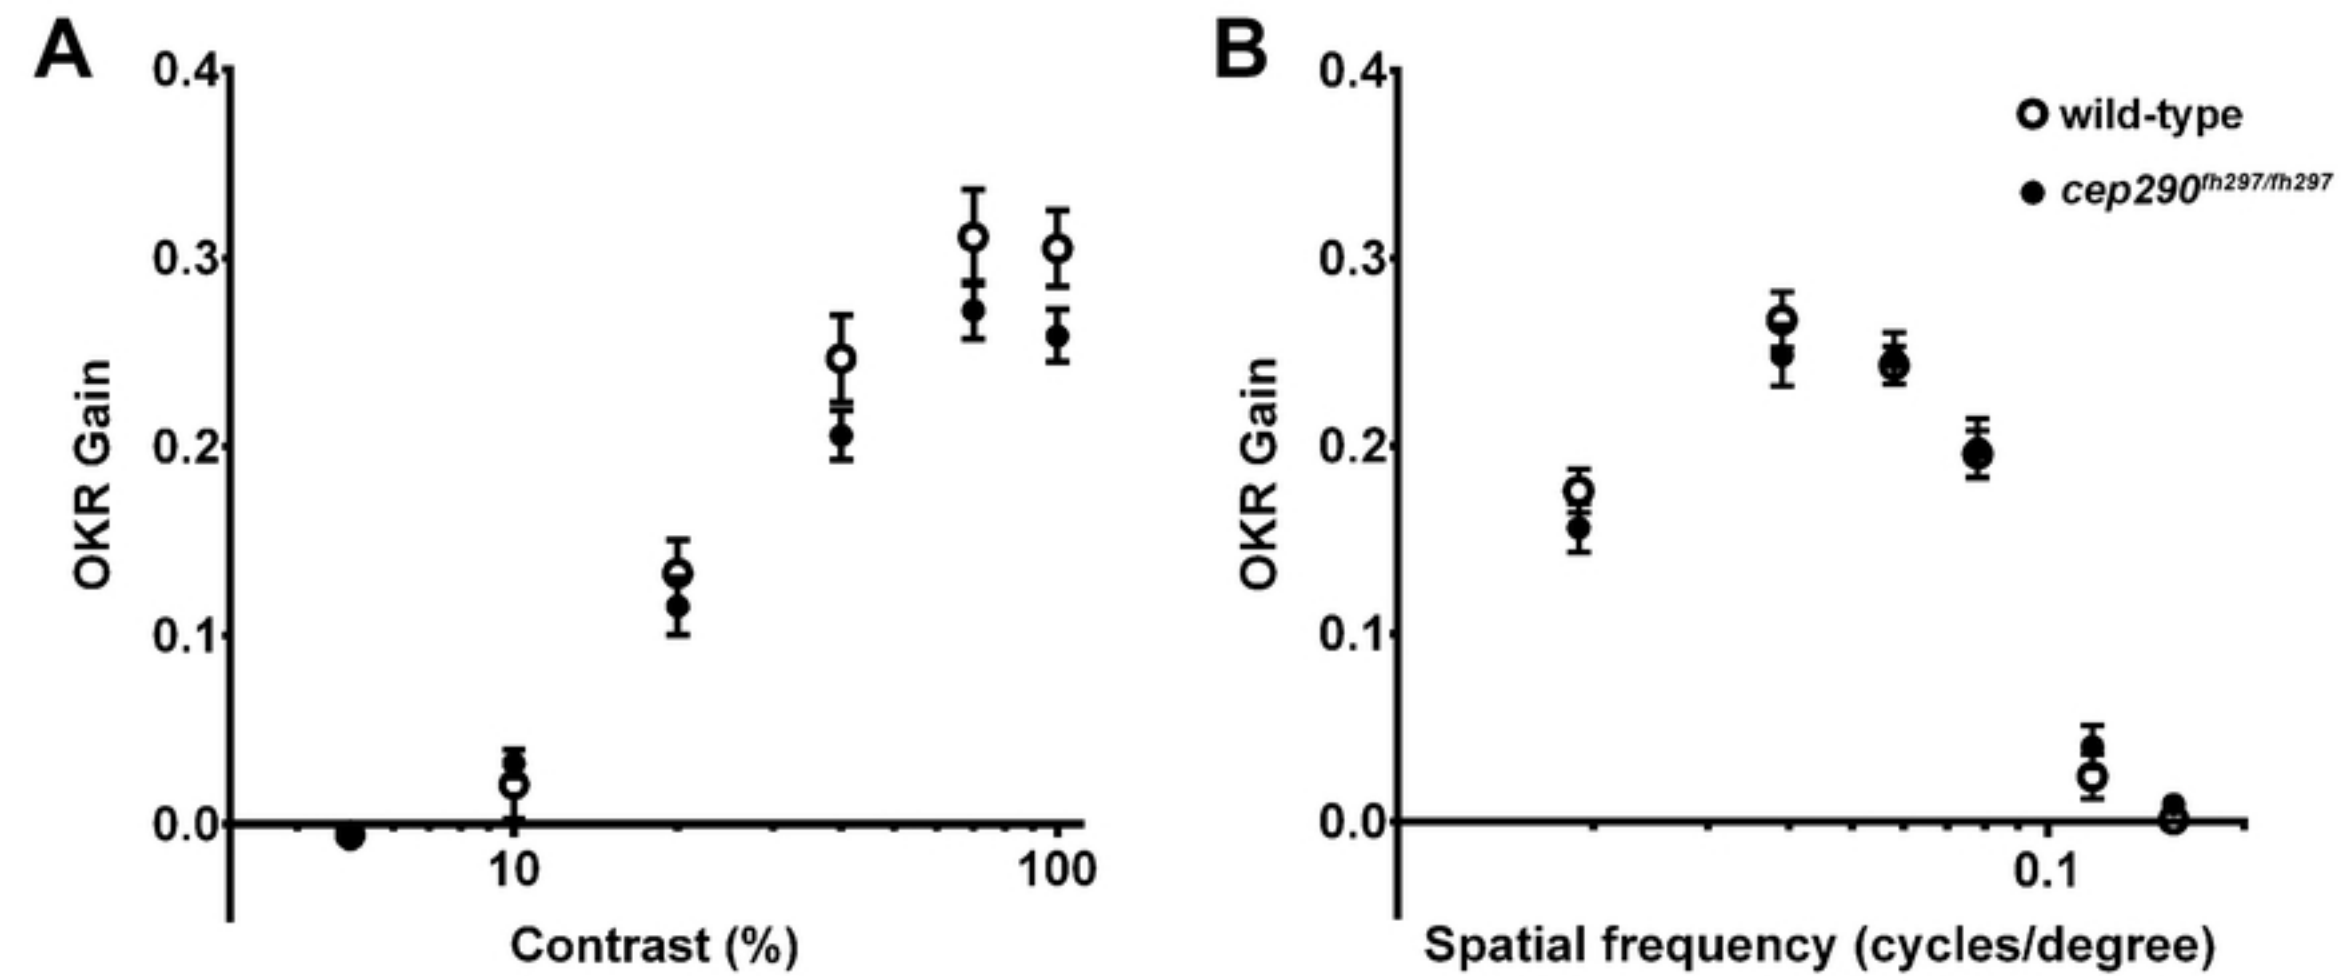

Figure 3

5 wpt 3 months 6 months 12 months

wild-type

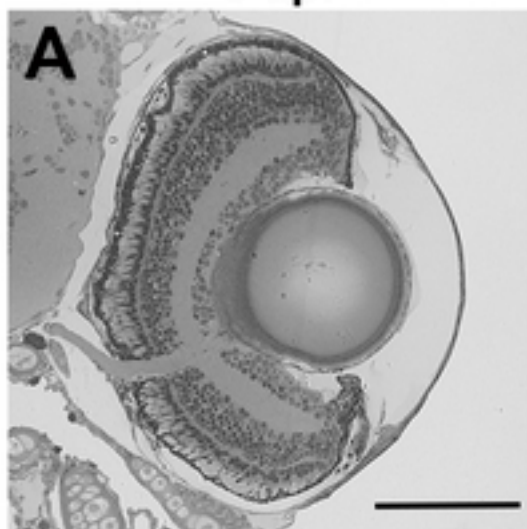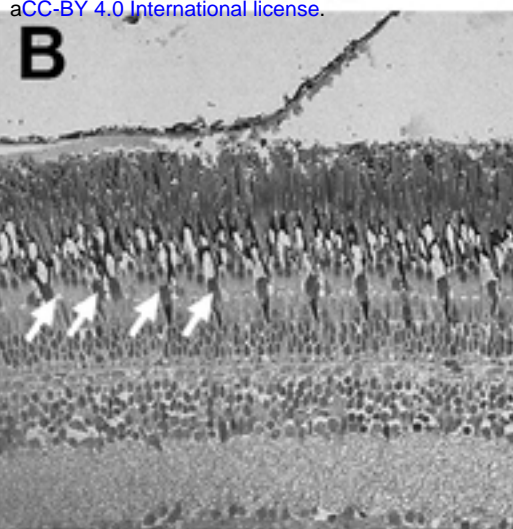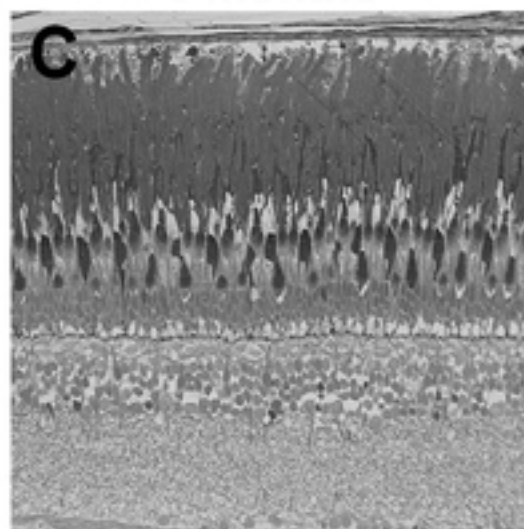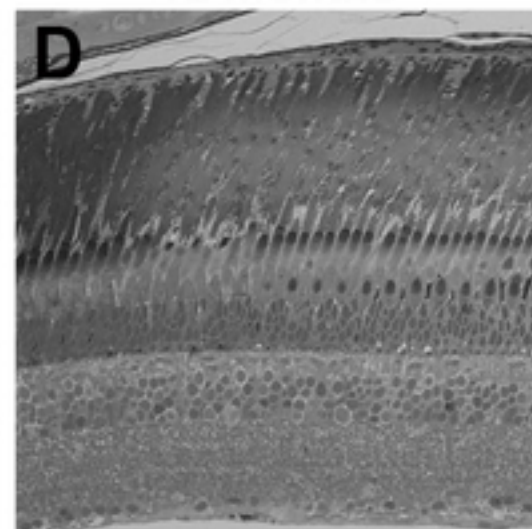

ROS  
COS  
ONL  
OPL  
INL  
IPL  
IGCL

*cep290*<sup>fh297/fh297</sup>

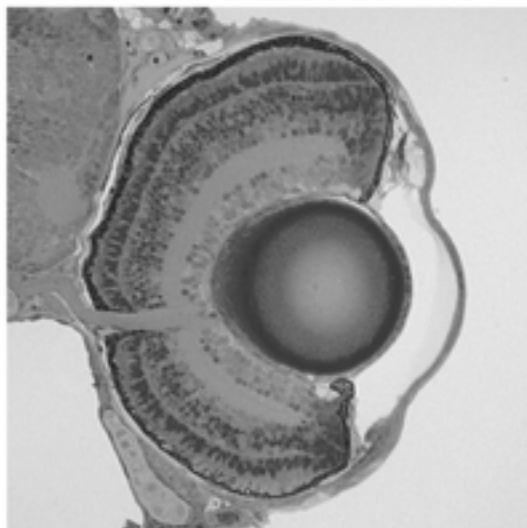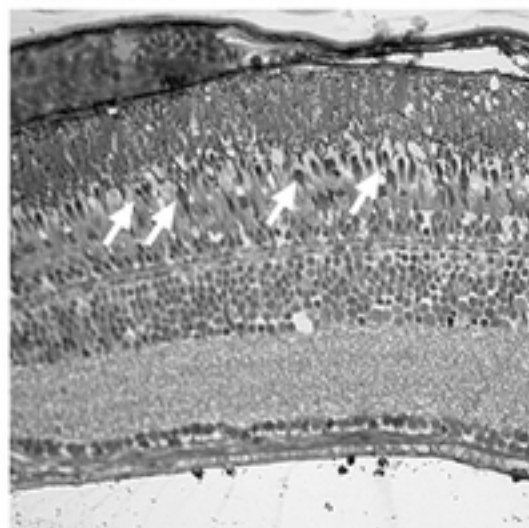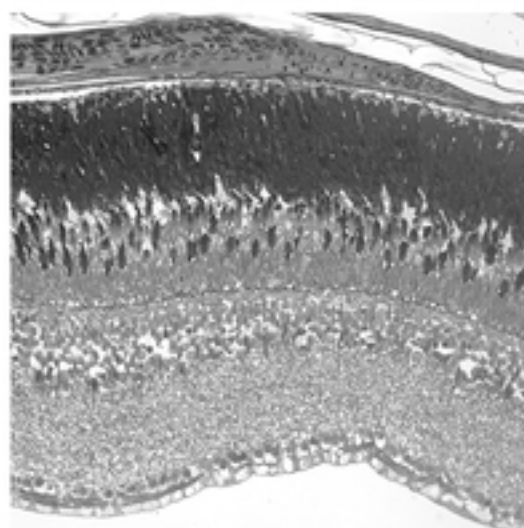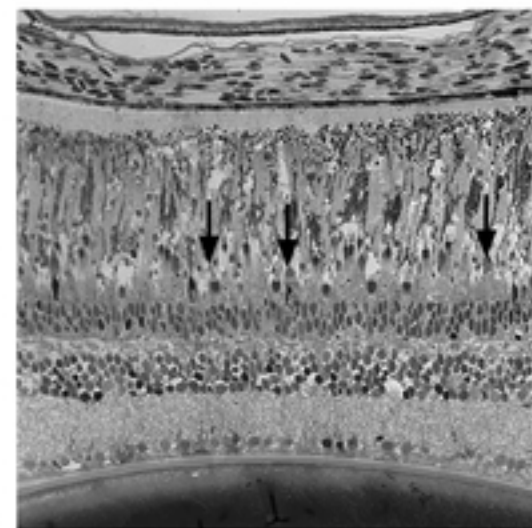

ROS  
COS  
ONL  
OPL  
INL  
IPL  
IGCL

**E**

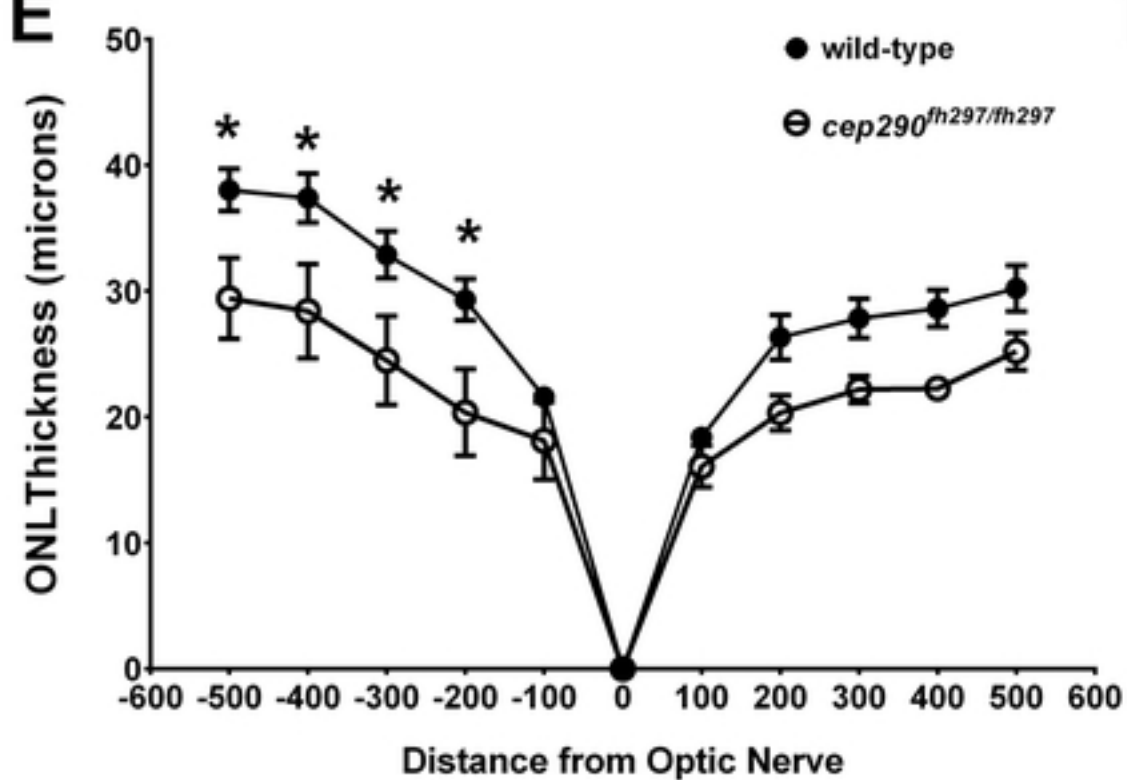

**F**

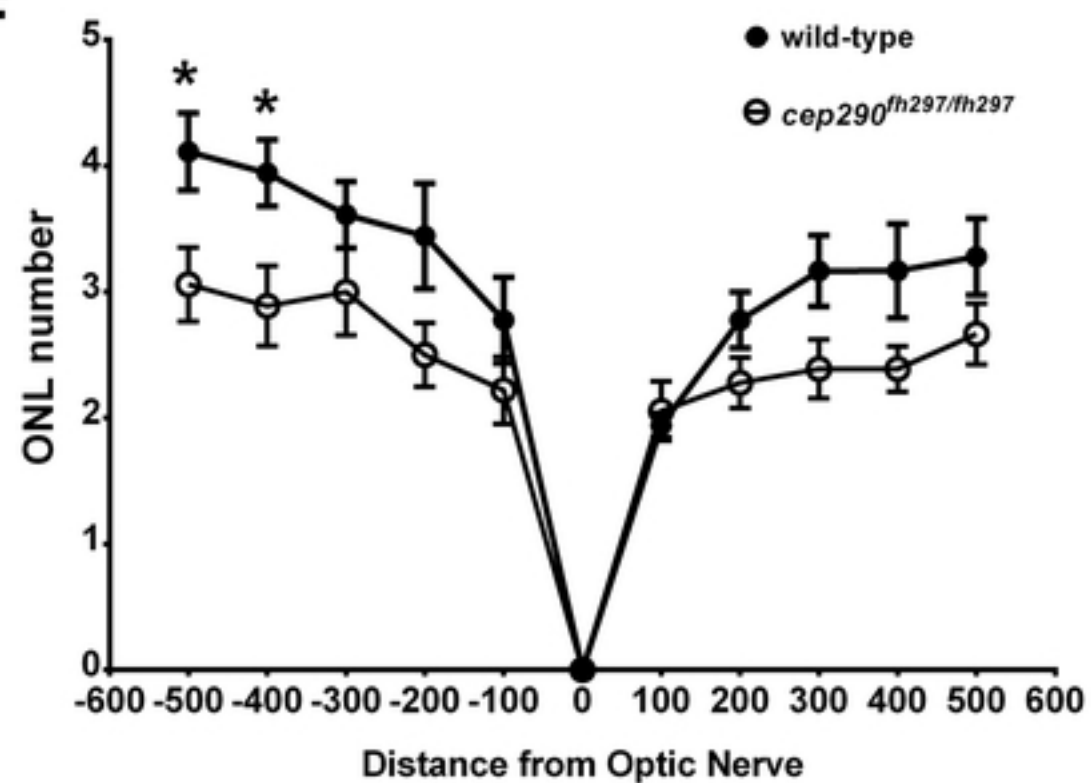

Figure 4

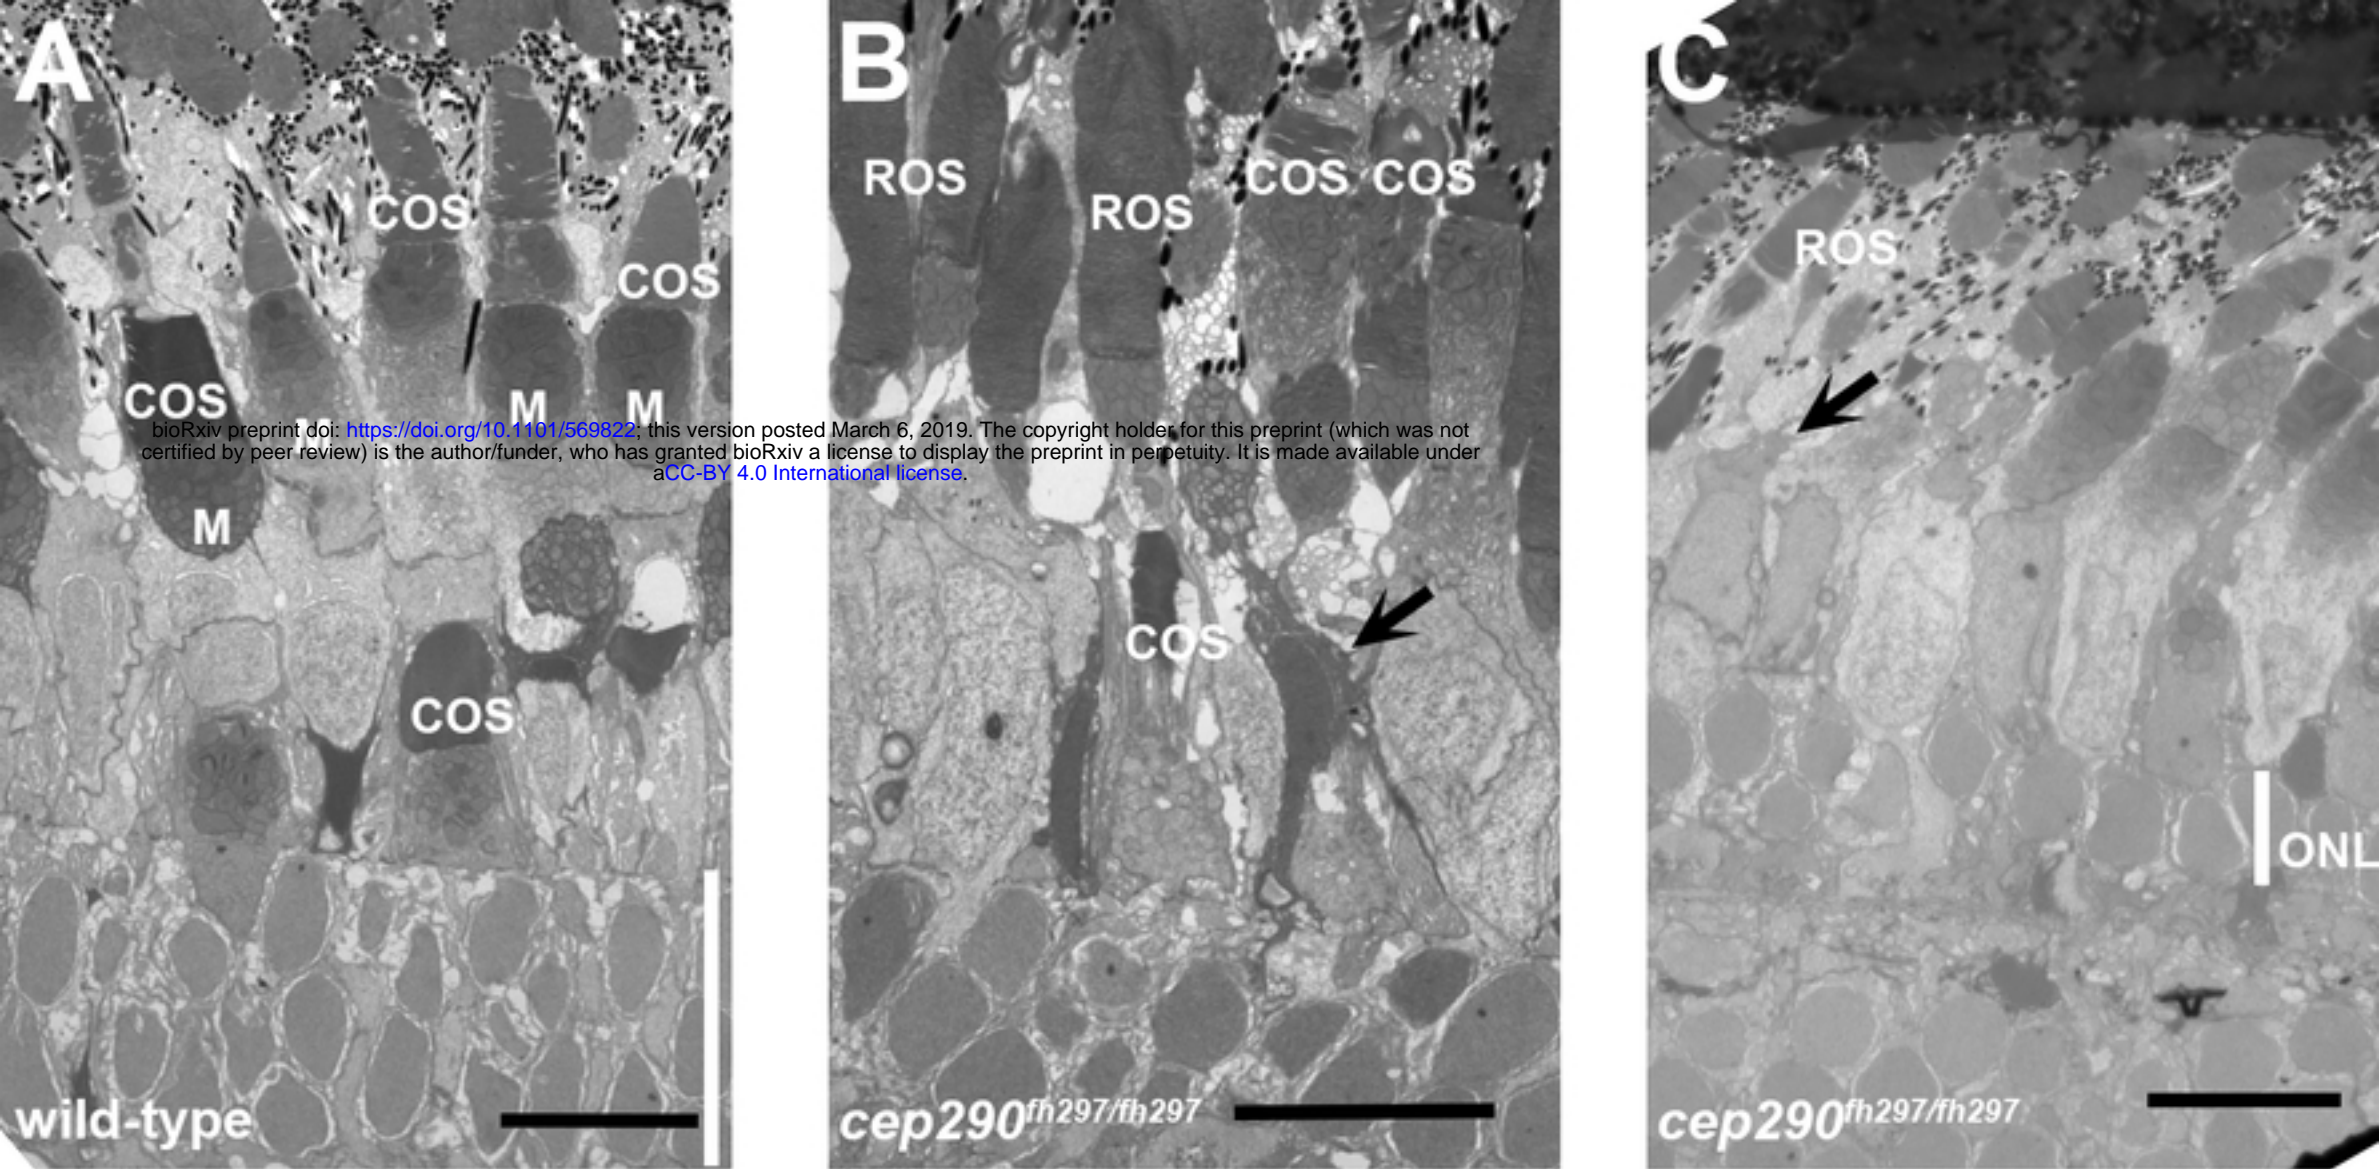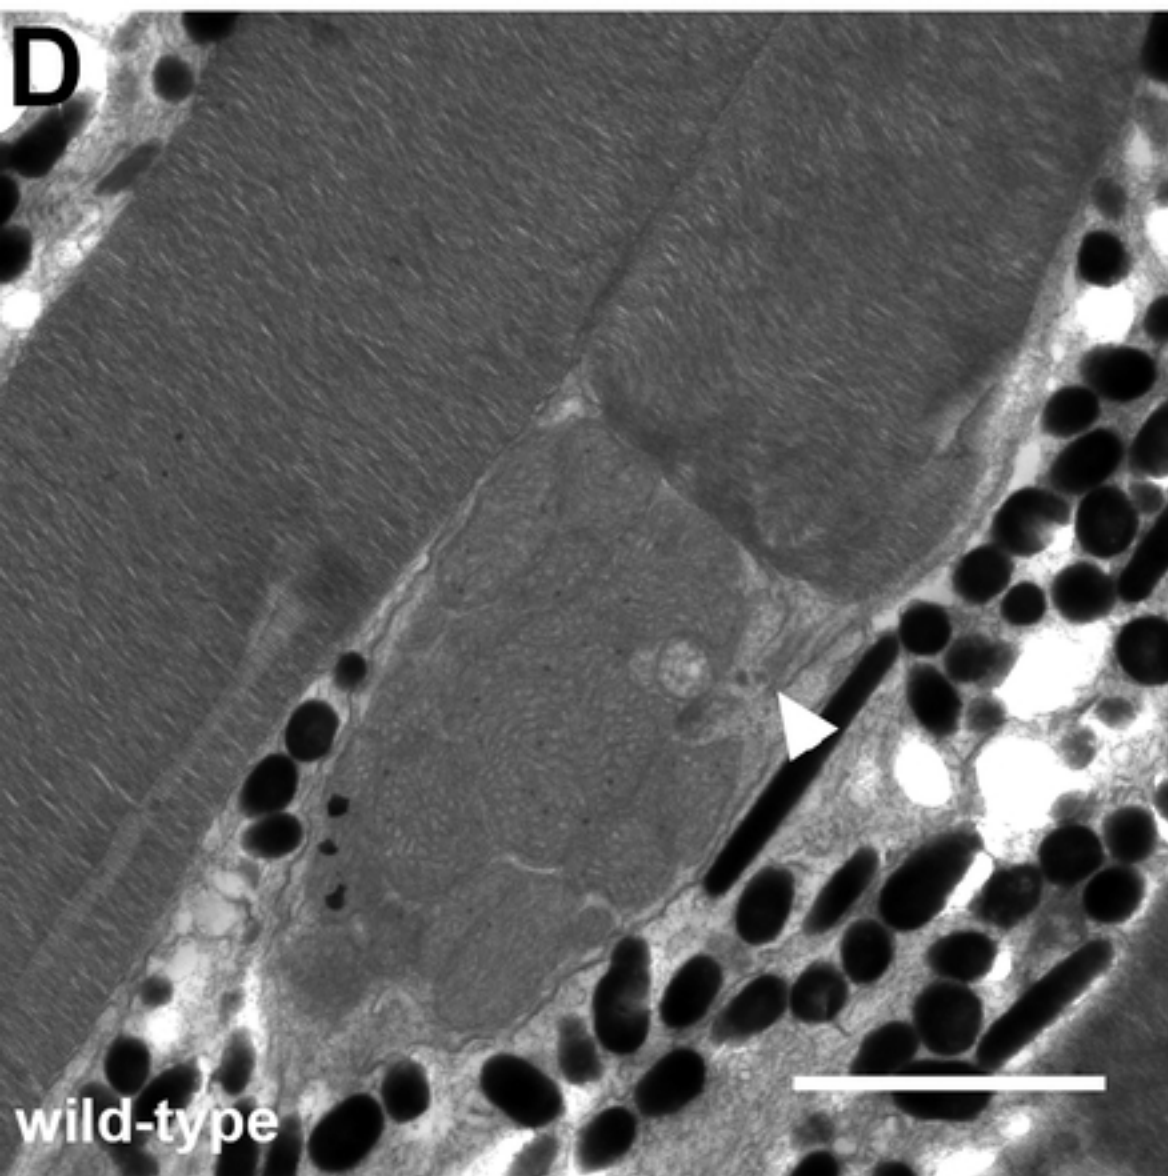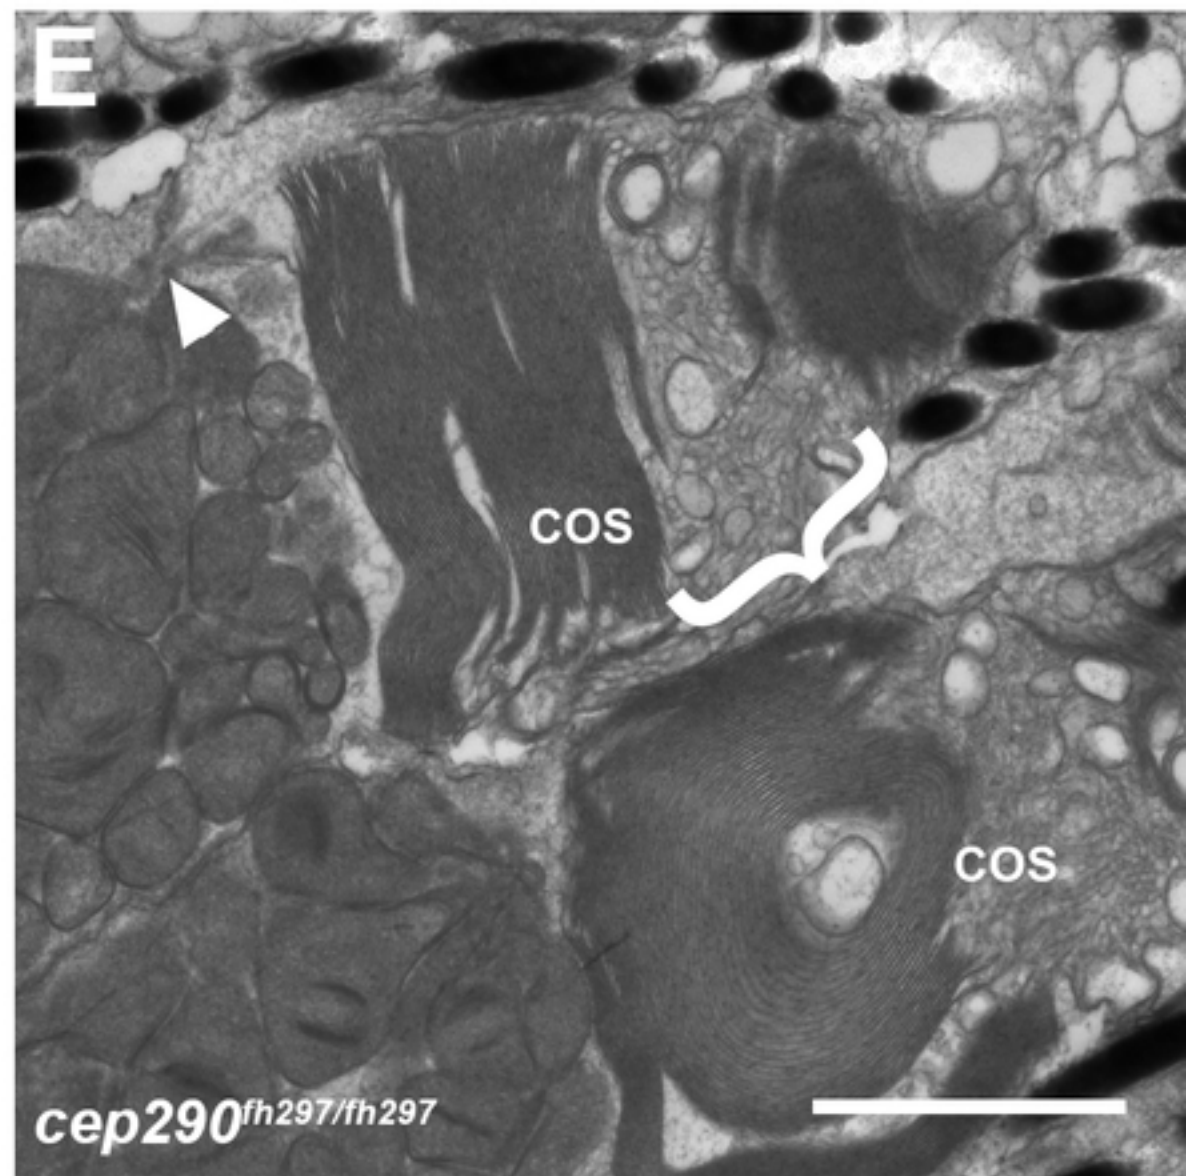

Figure 5

wild-type

*cep290*<sup>fh297/fh297</sup>

3 mpf

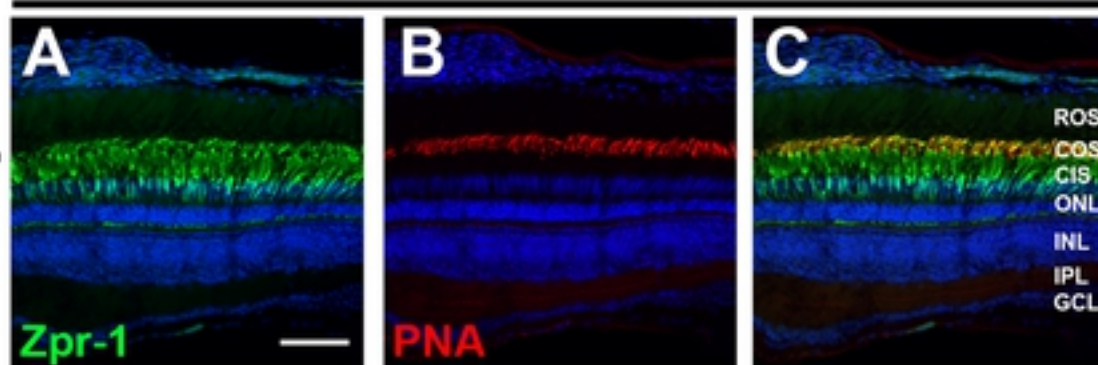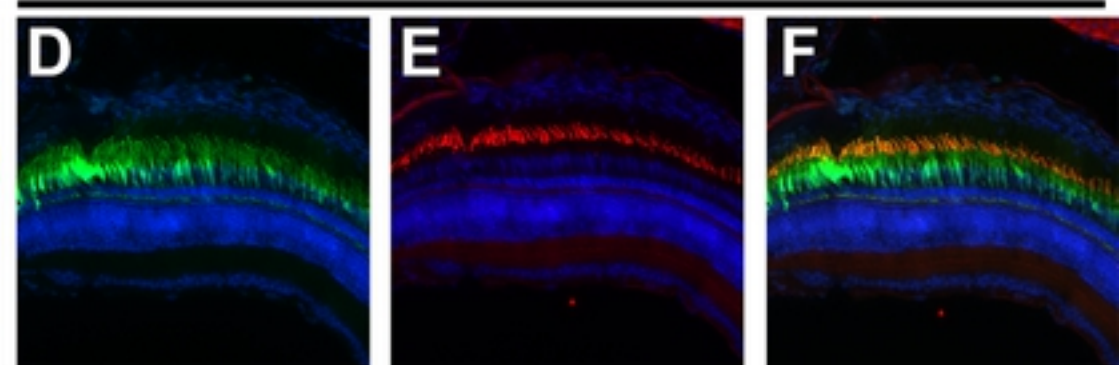

6 mpf

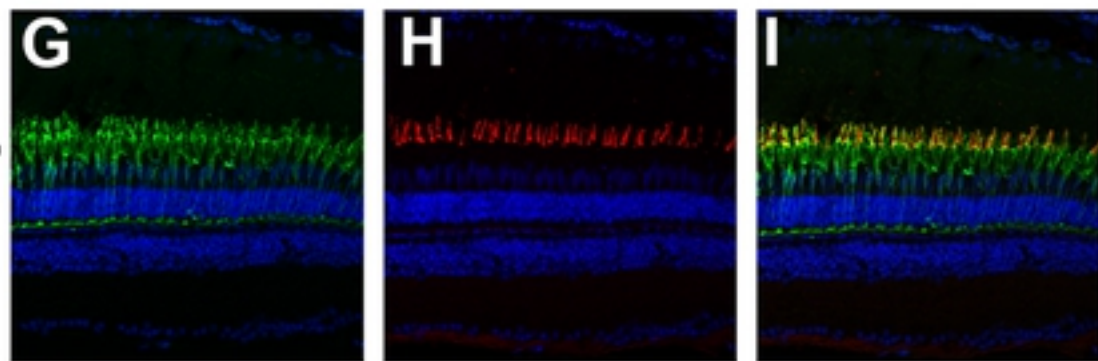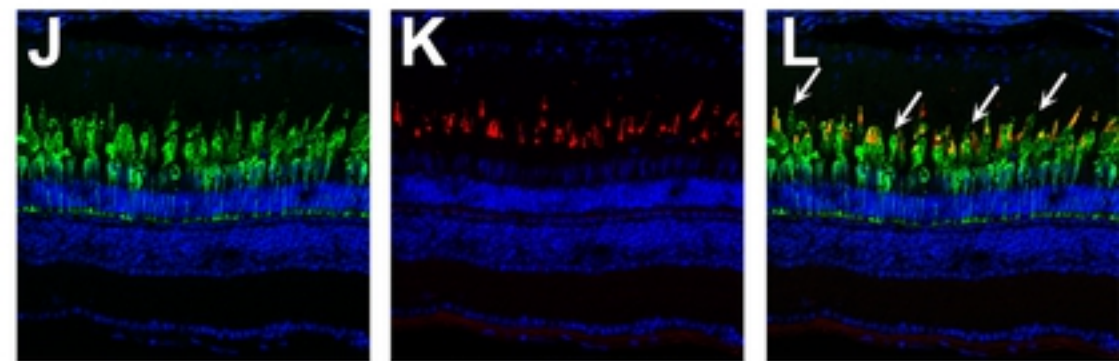

12 mpf

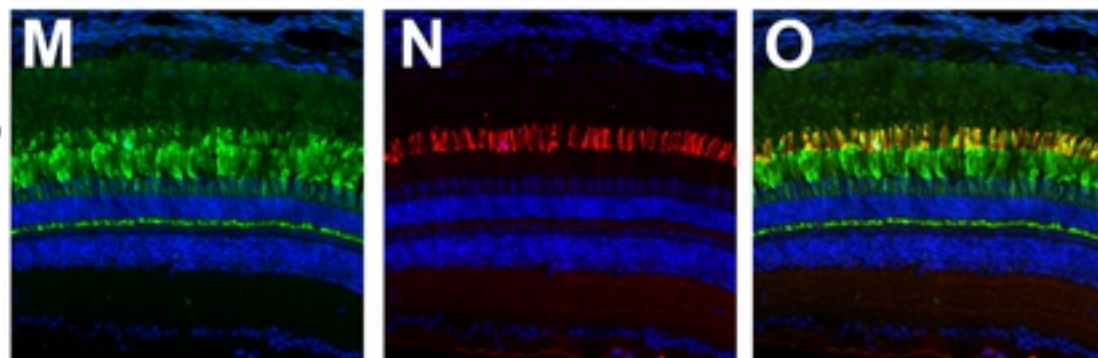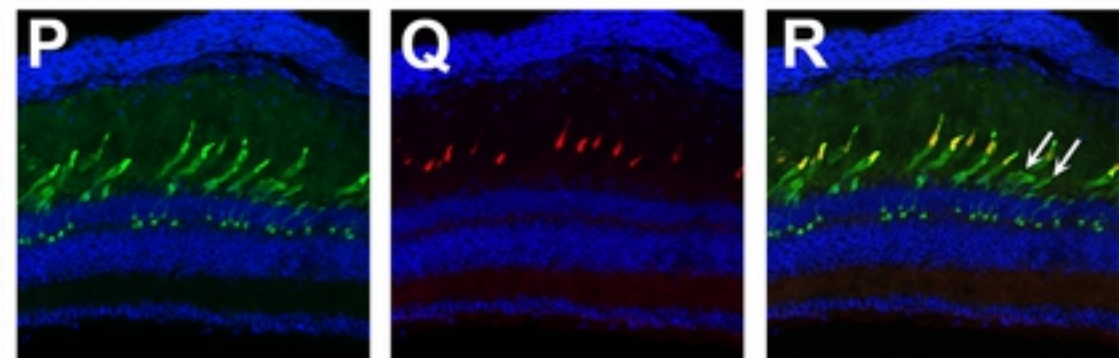

Figure 6

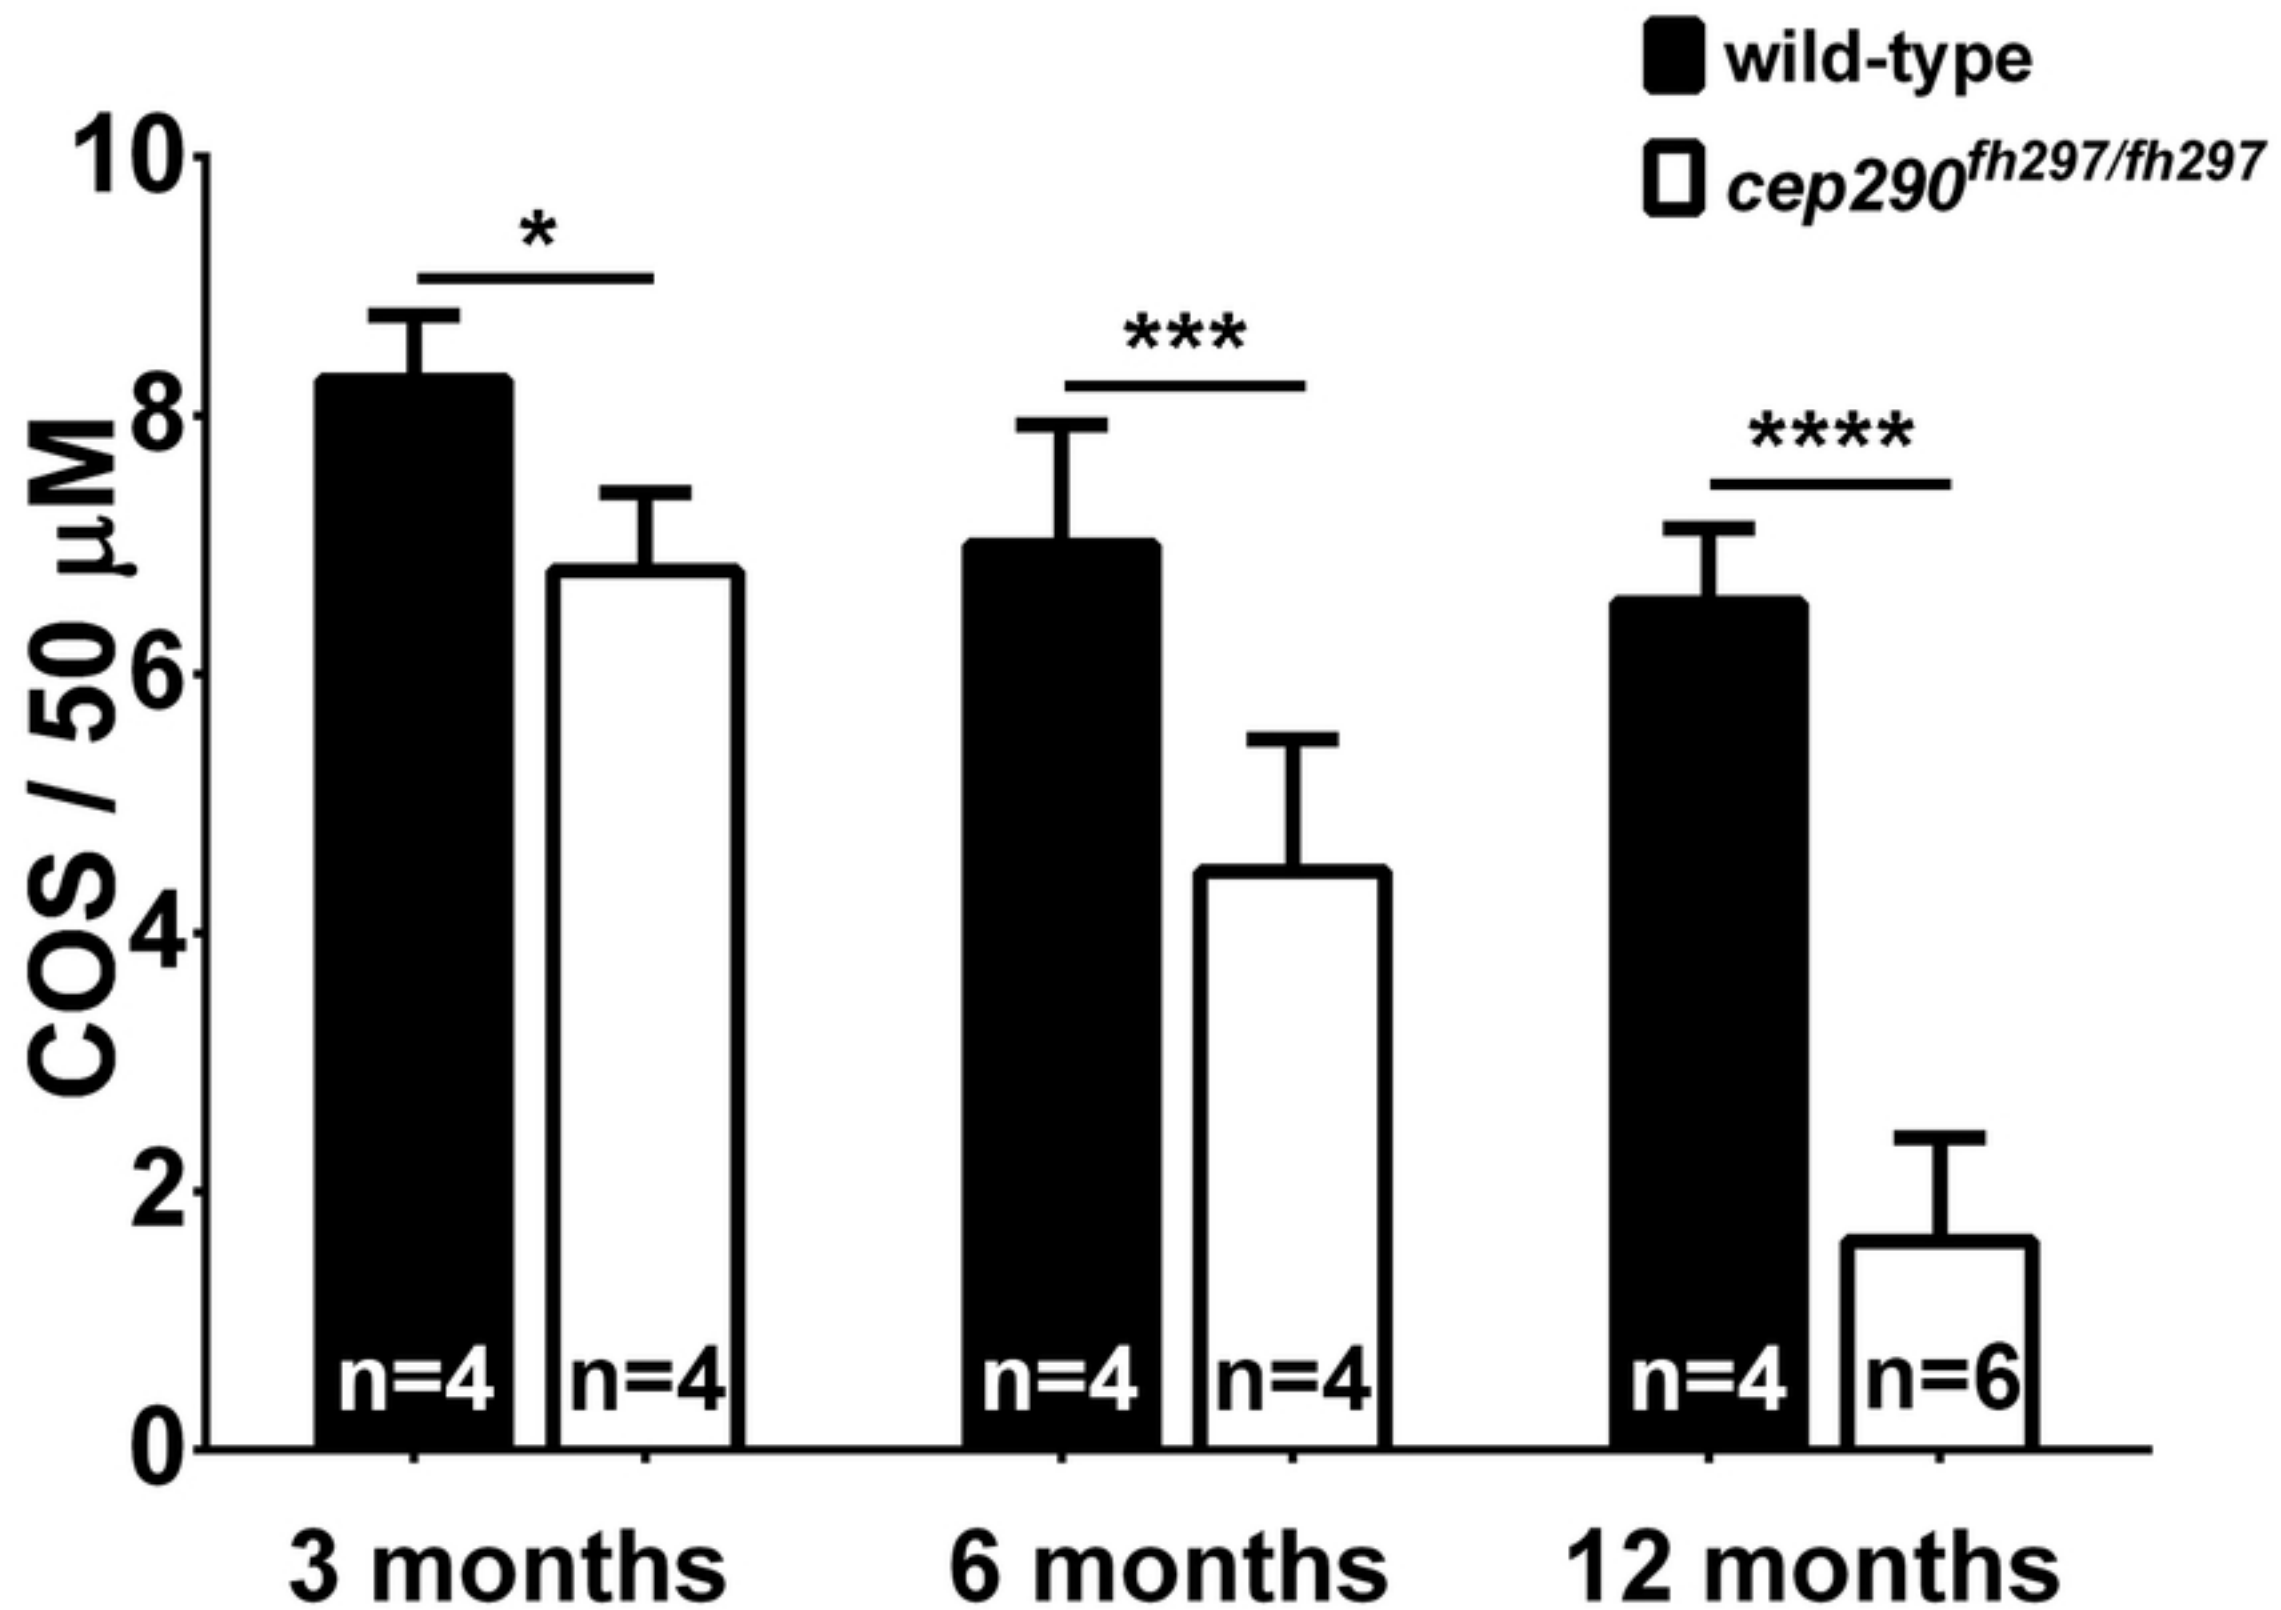

Figure 7

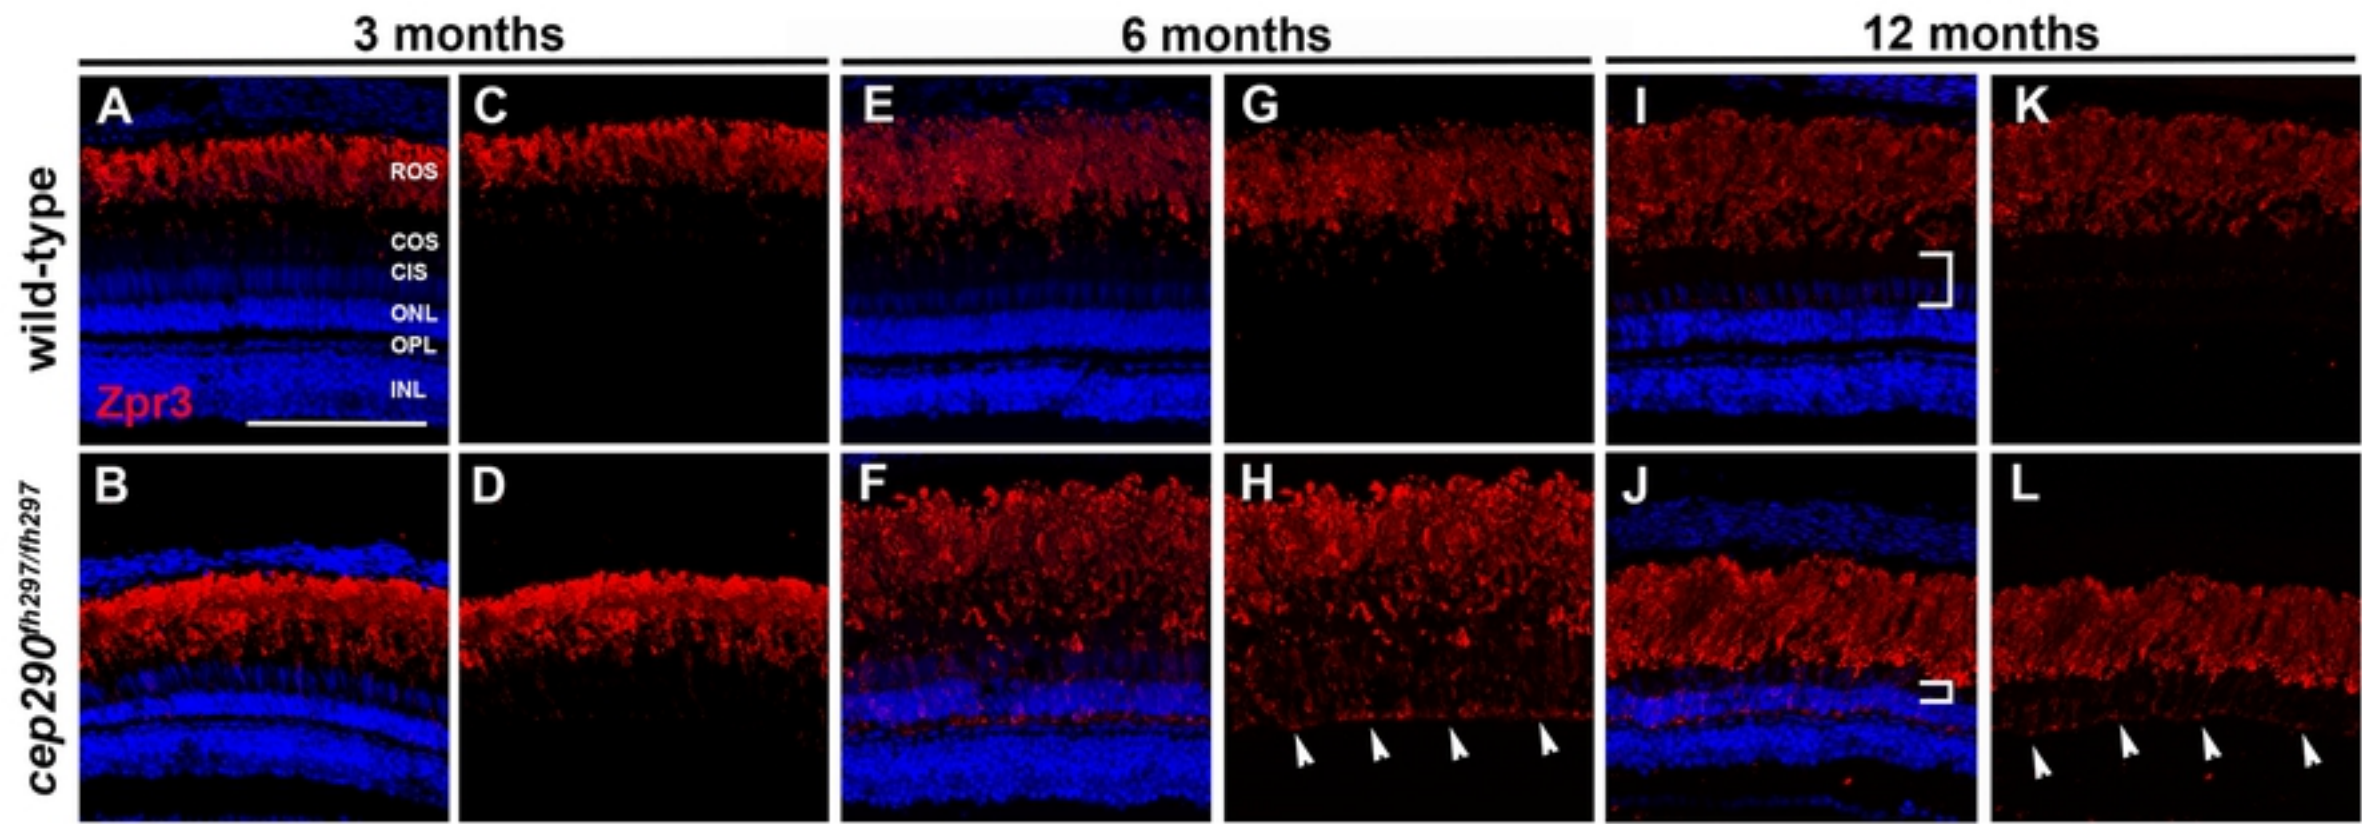

Figure 8



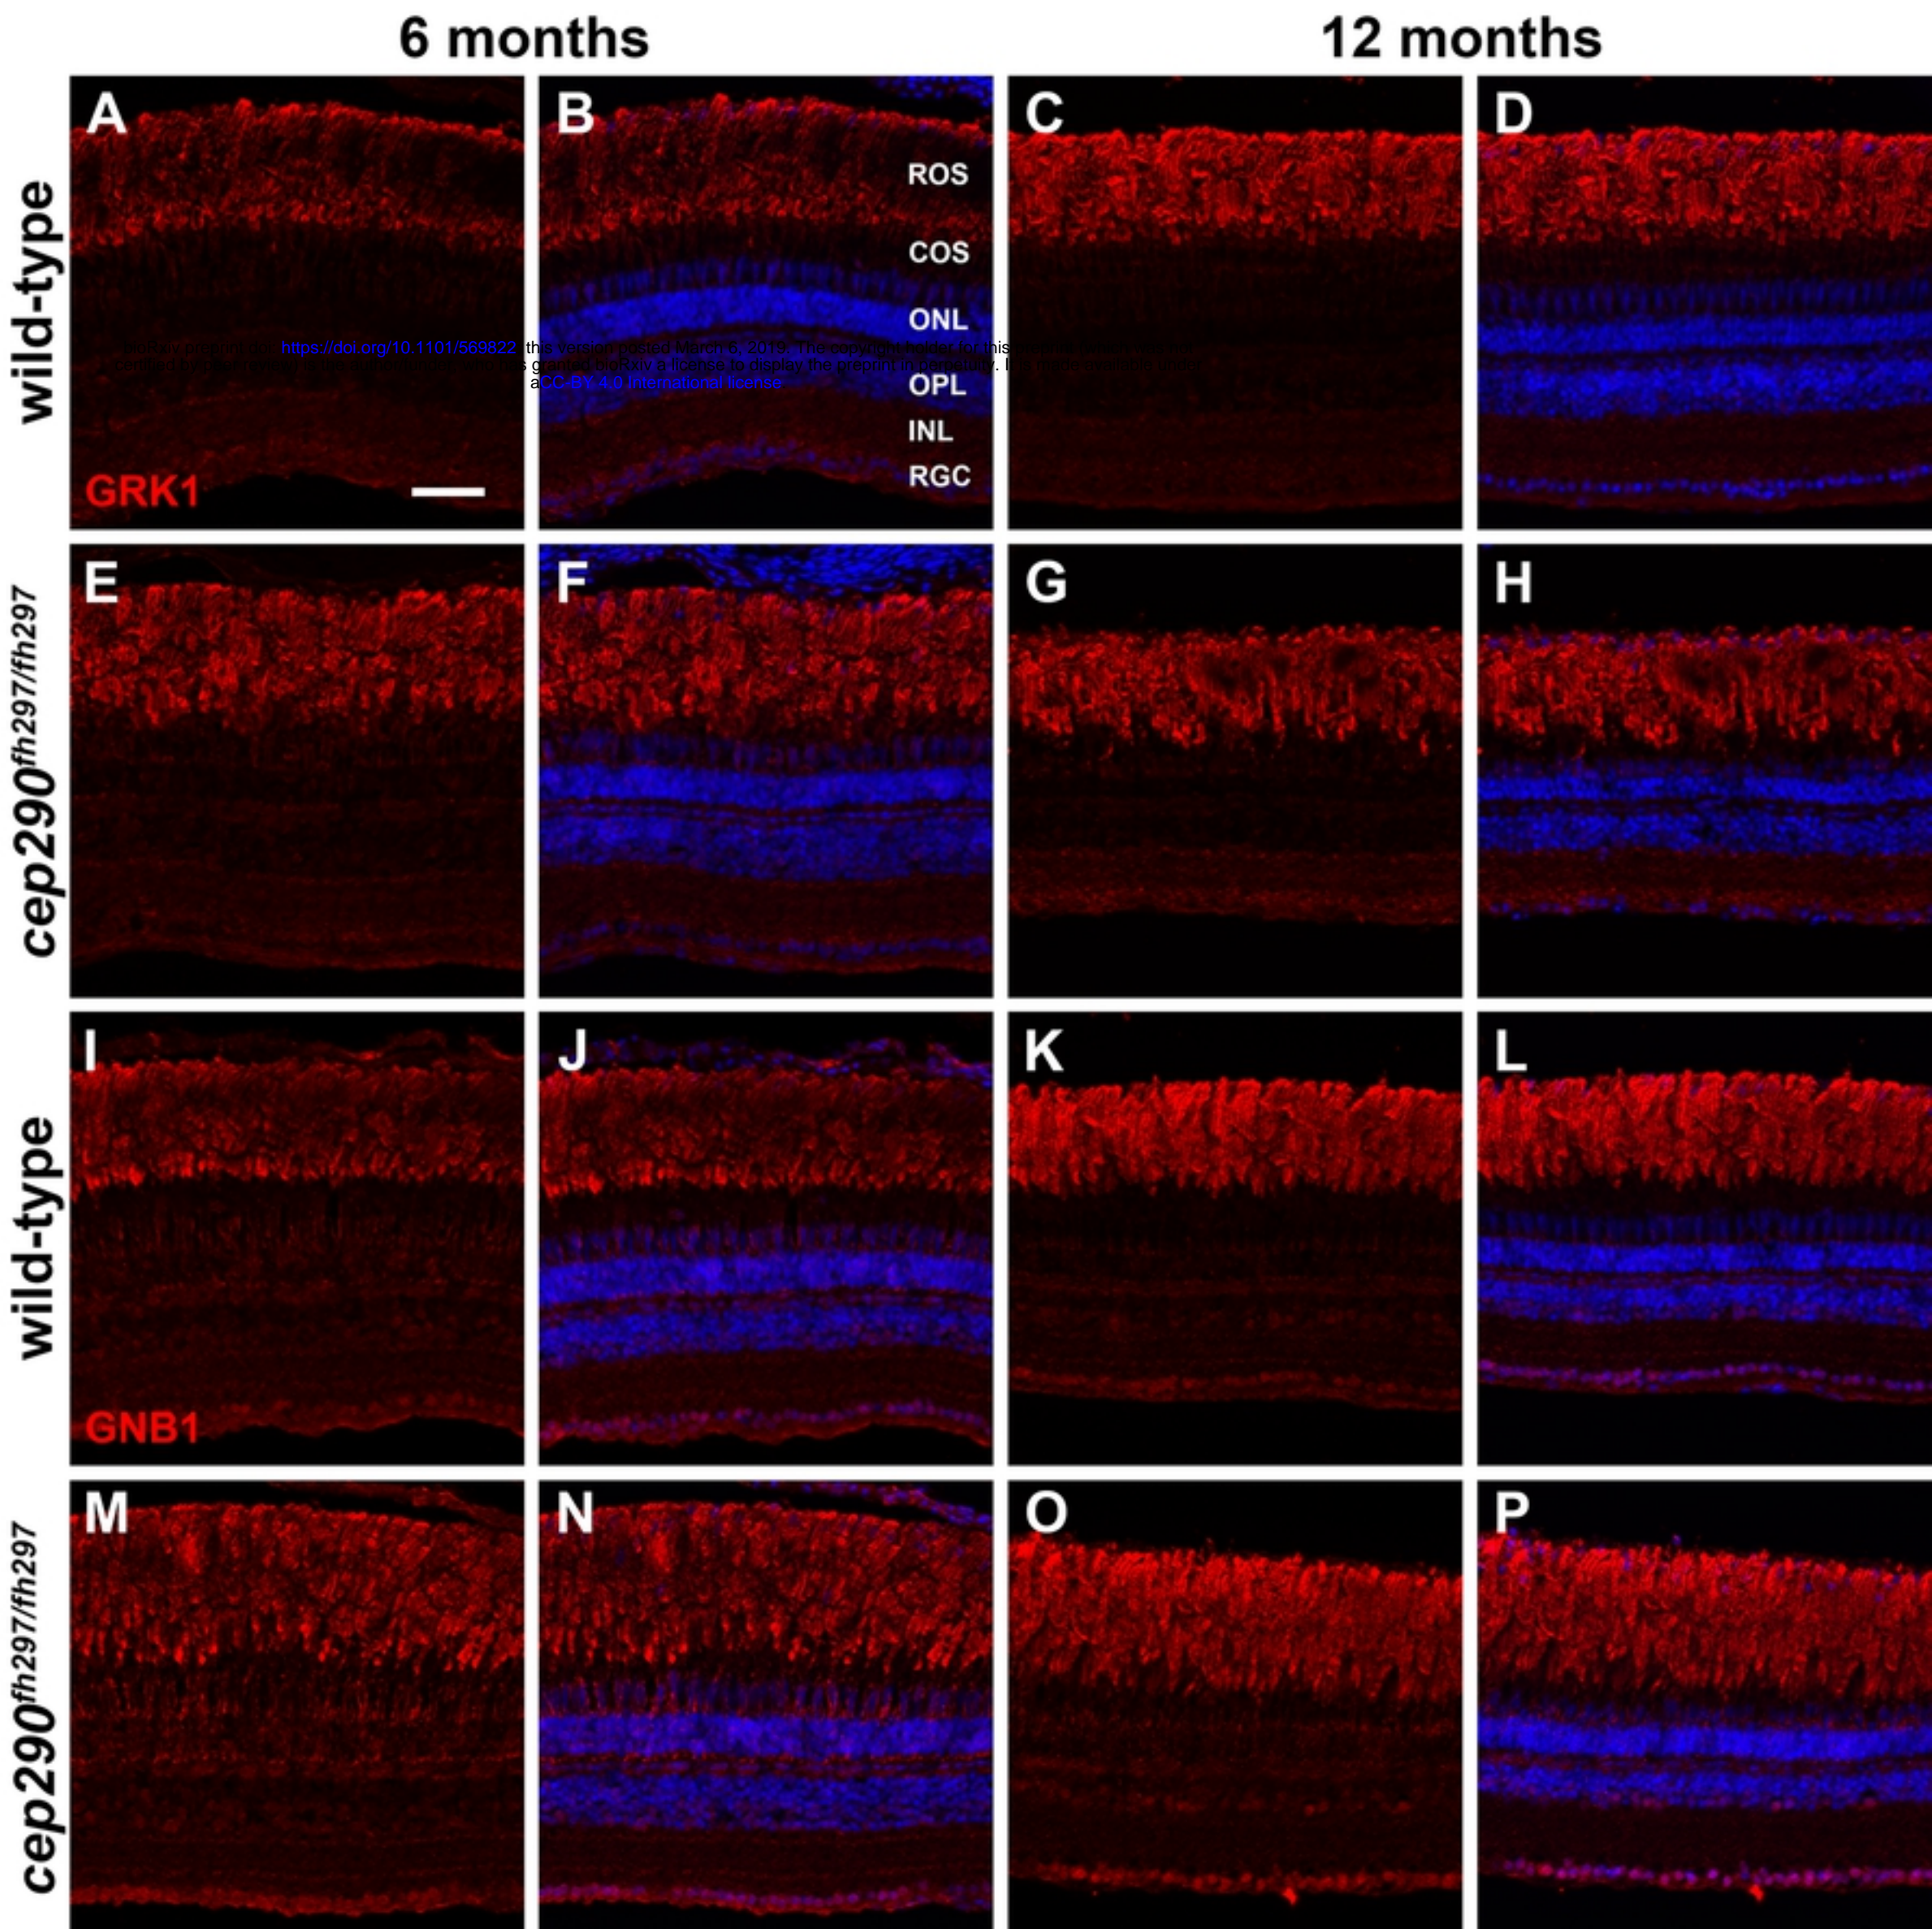

Figure 9

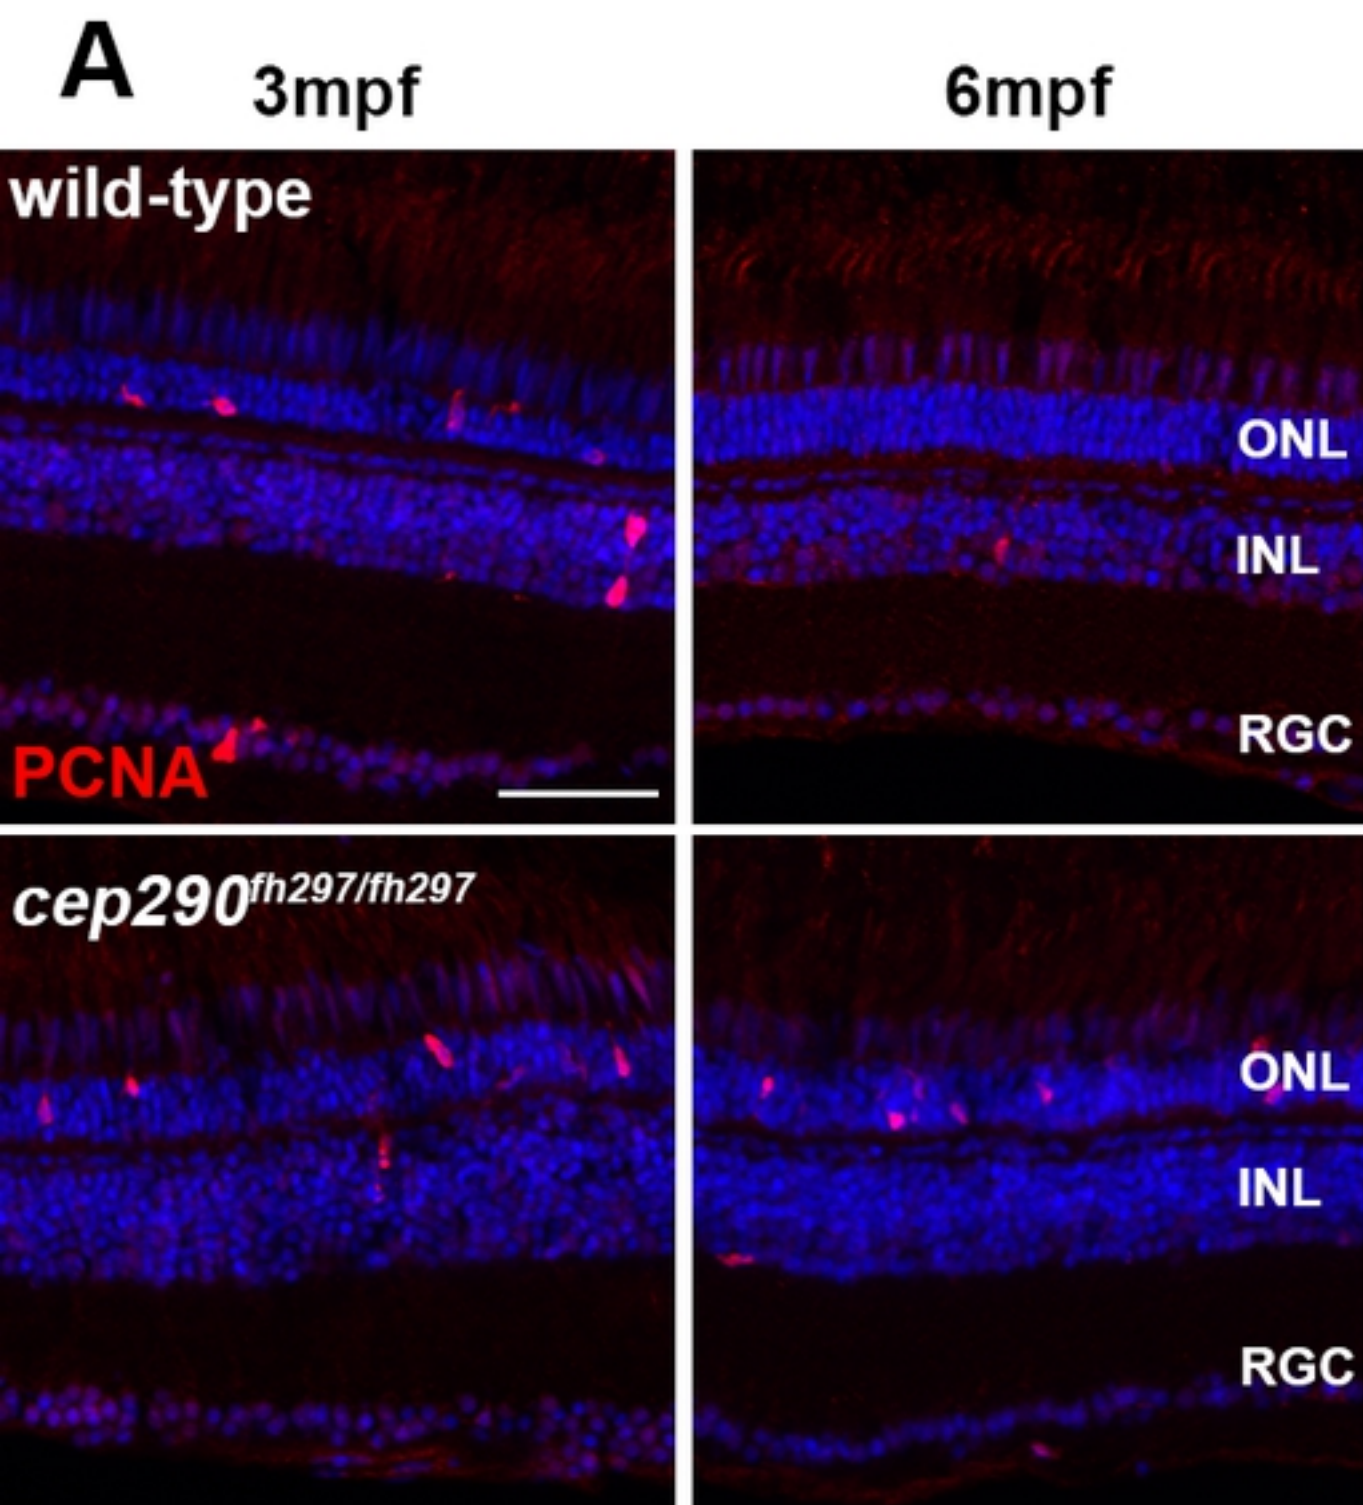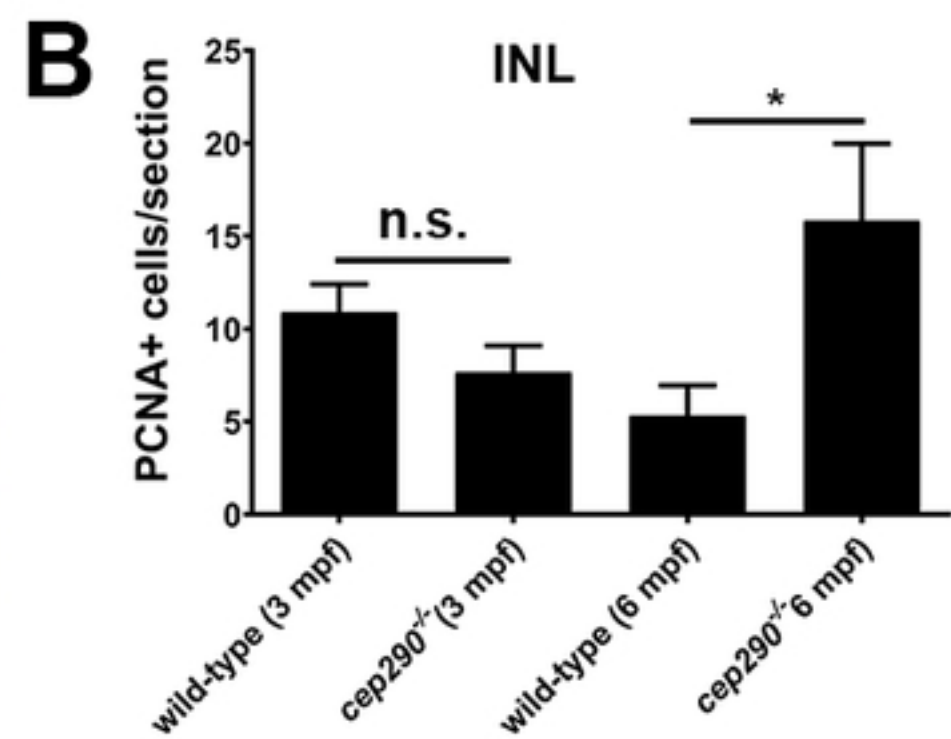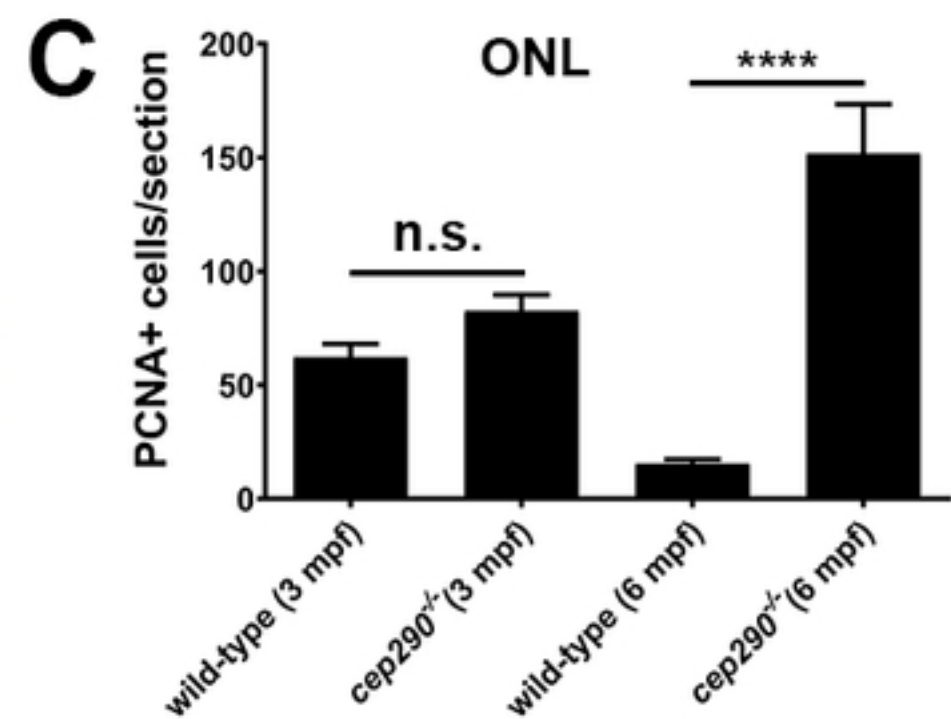

Figure 10

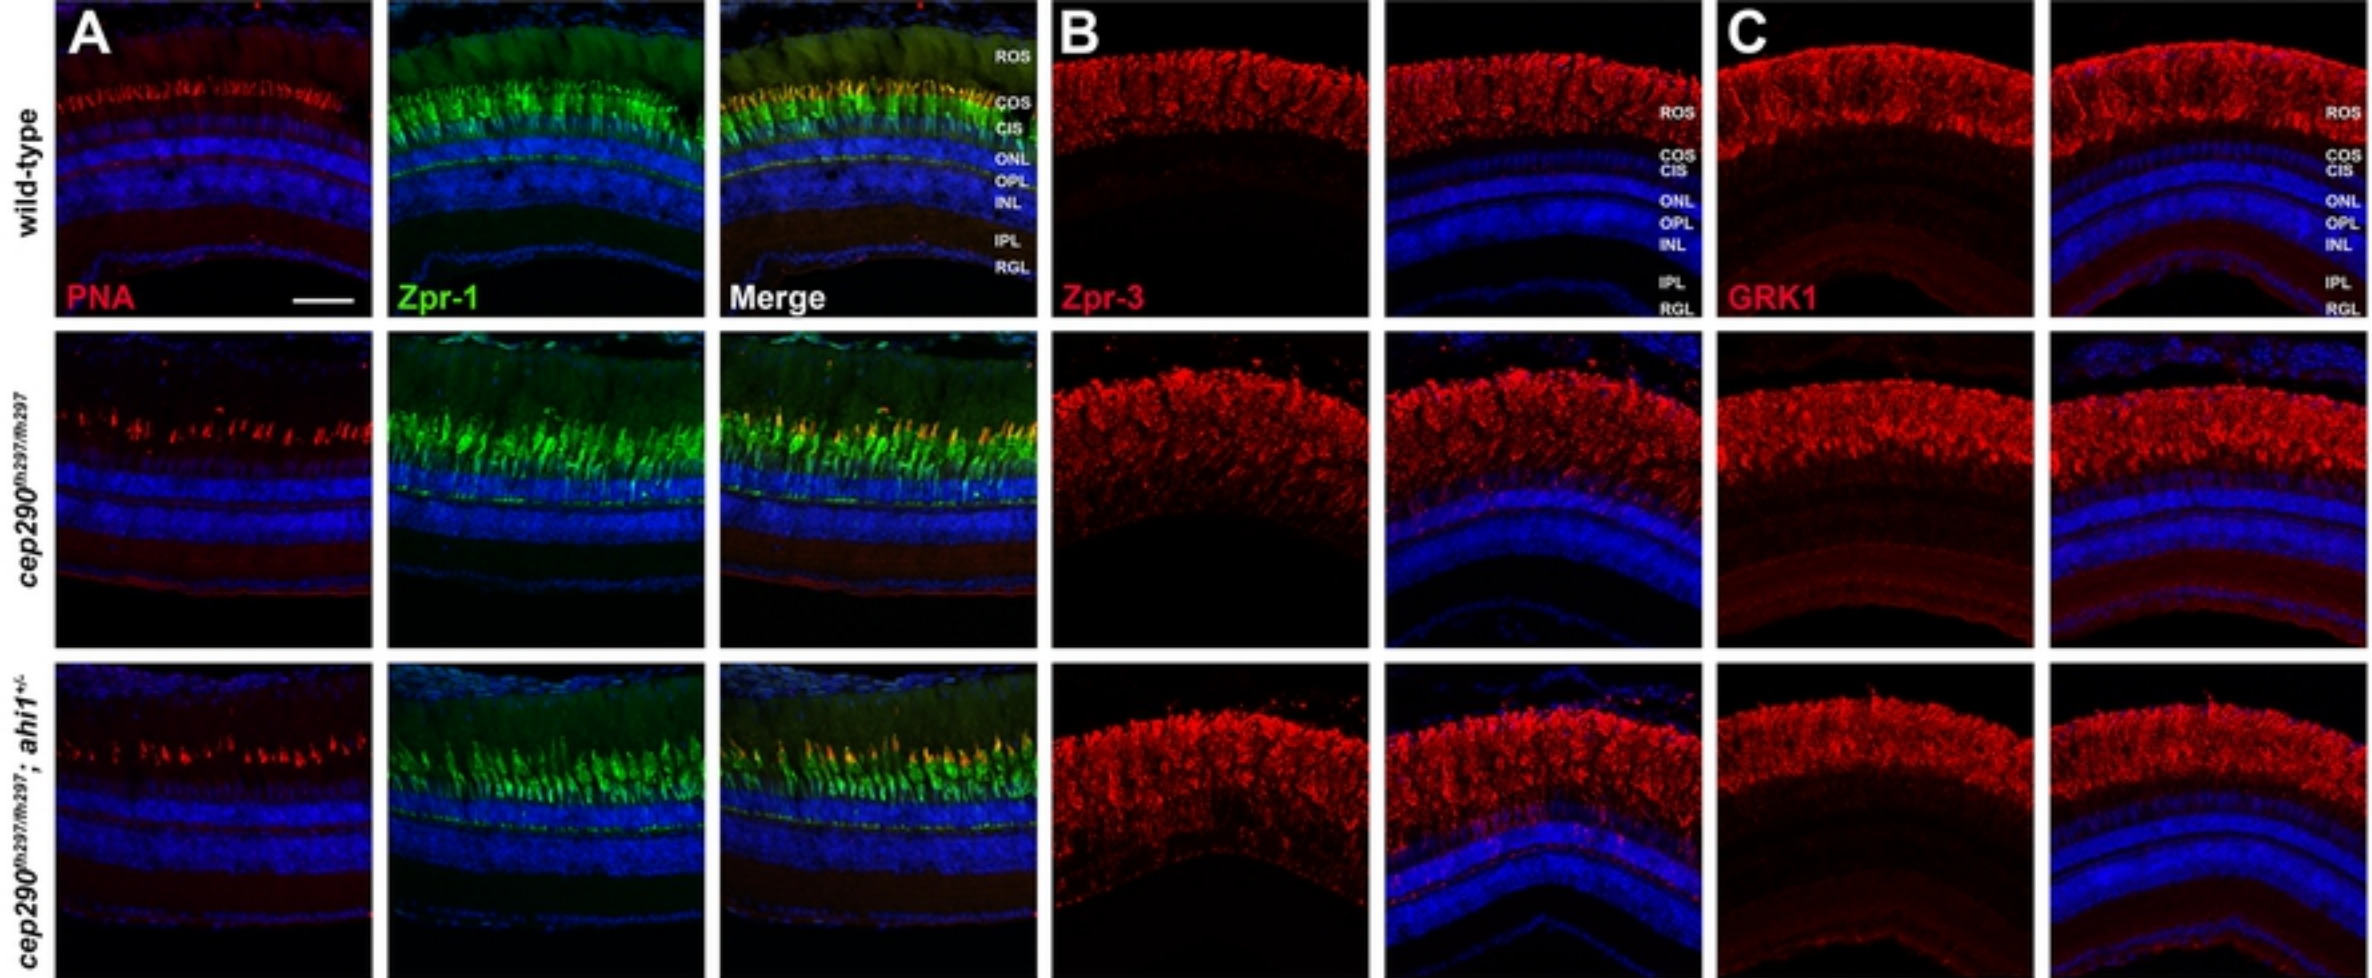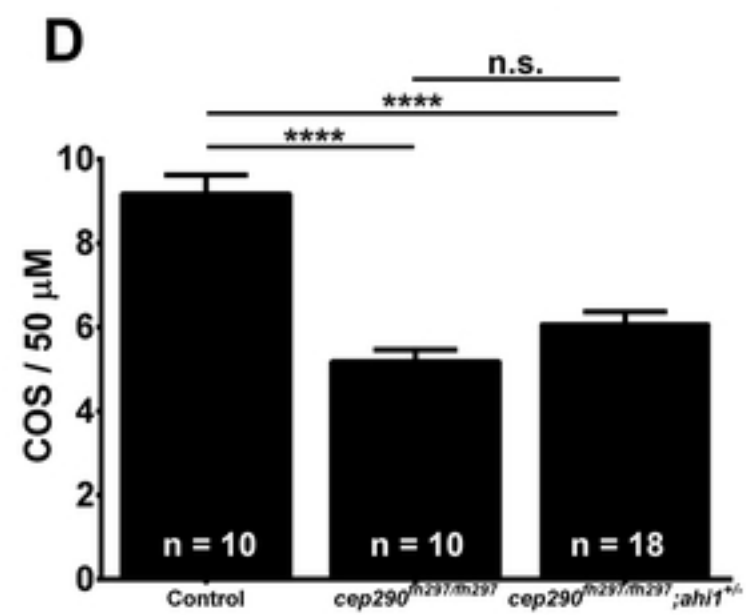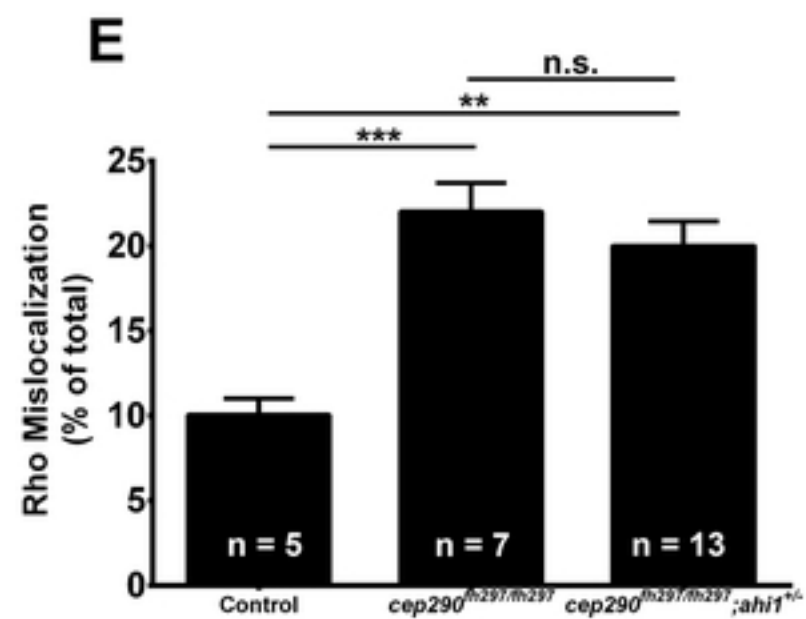

Figure 11

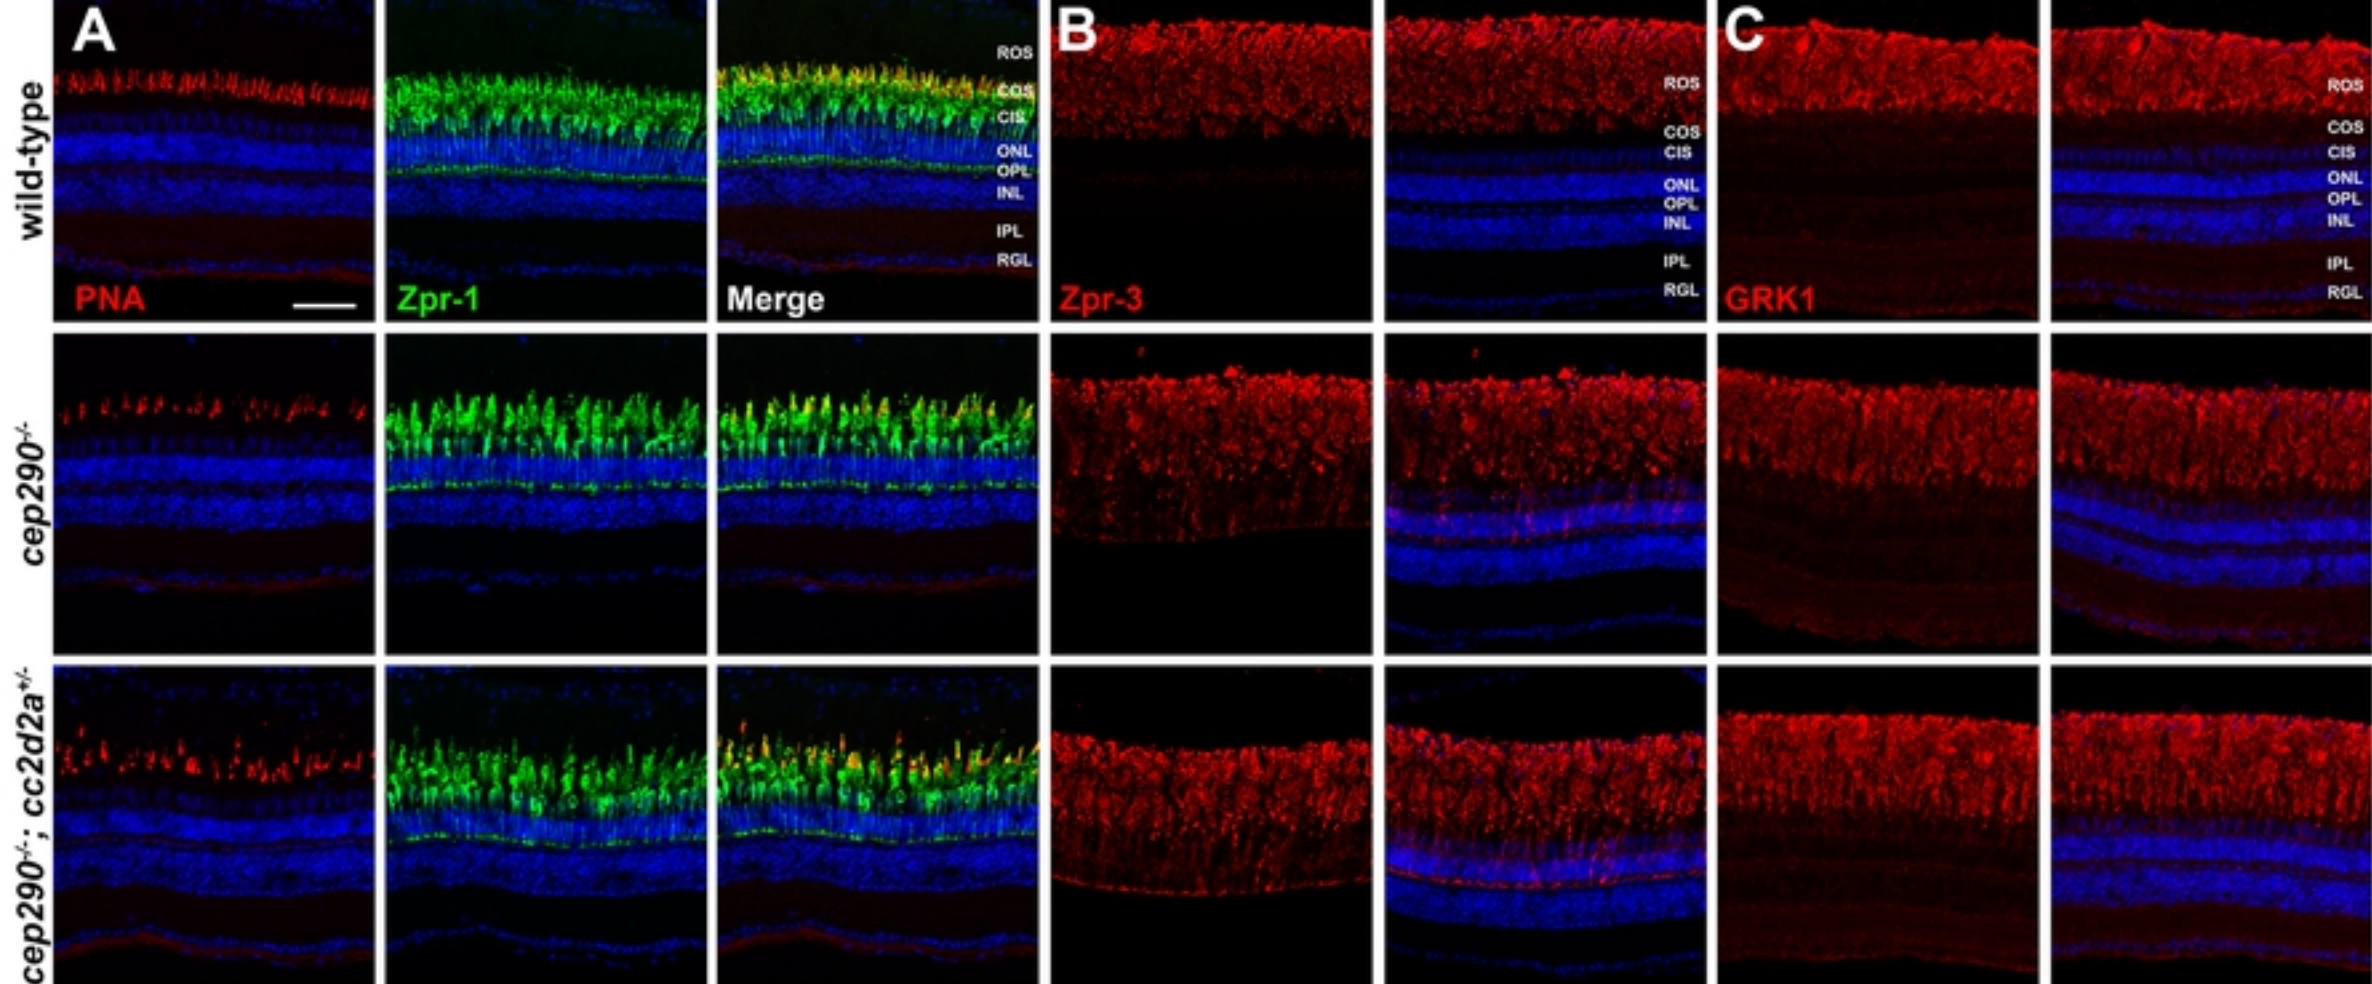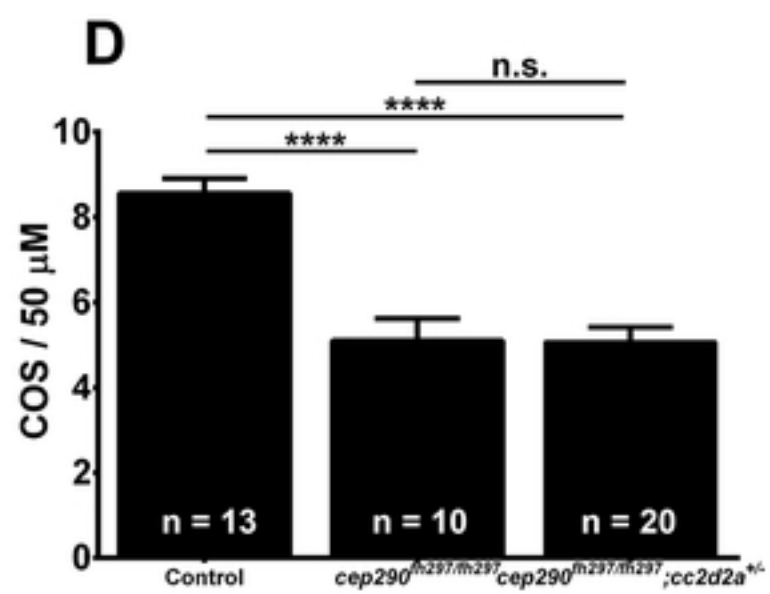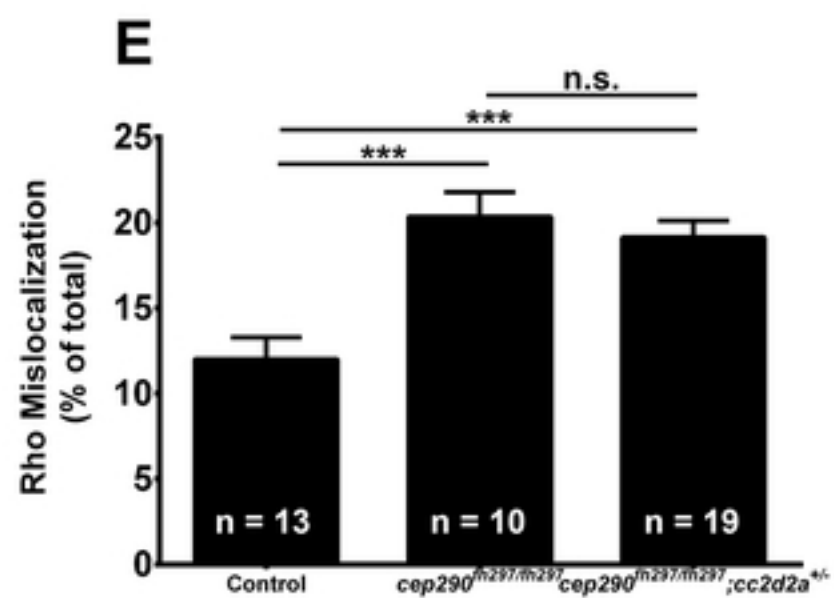

Figure 12

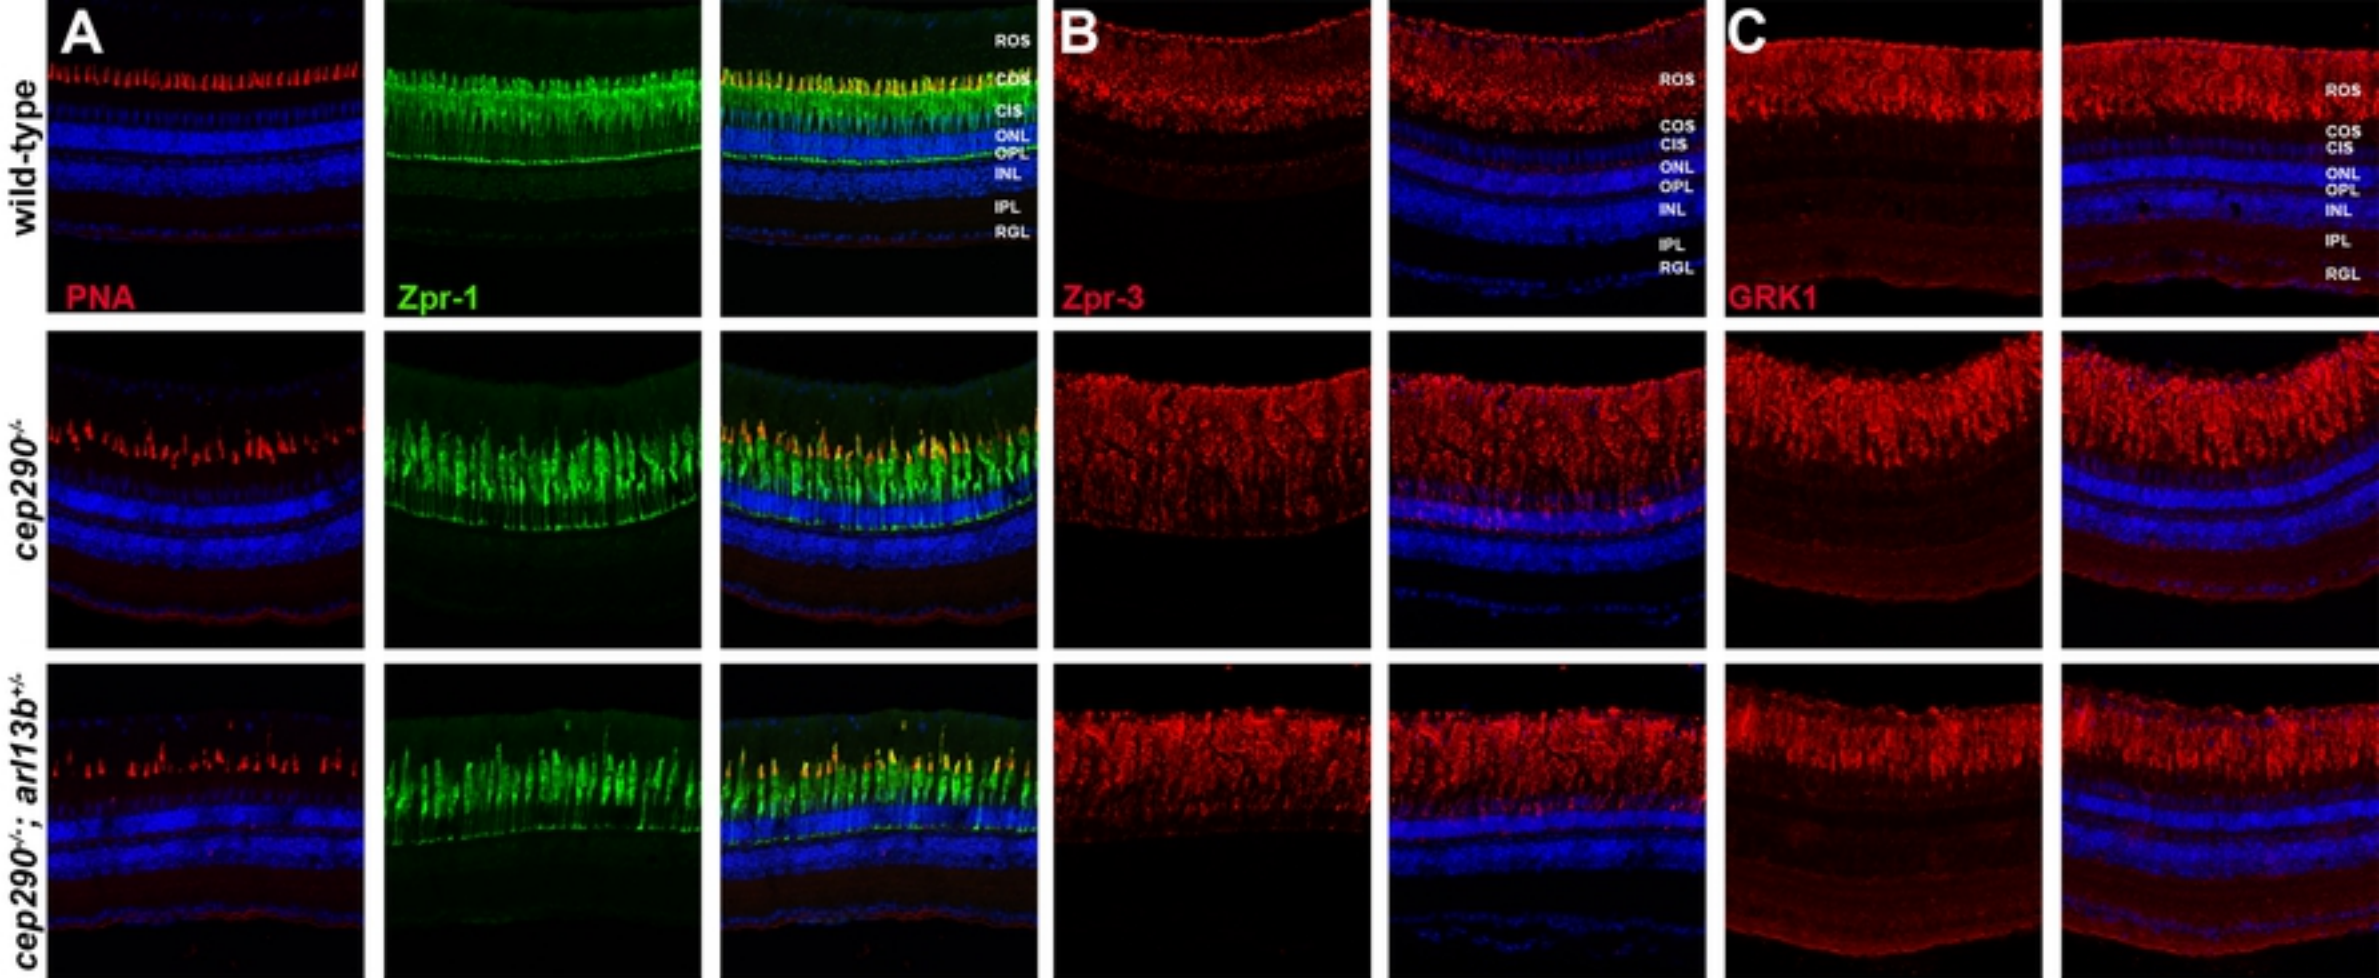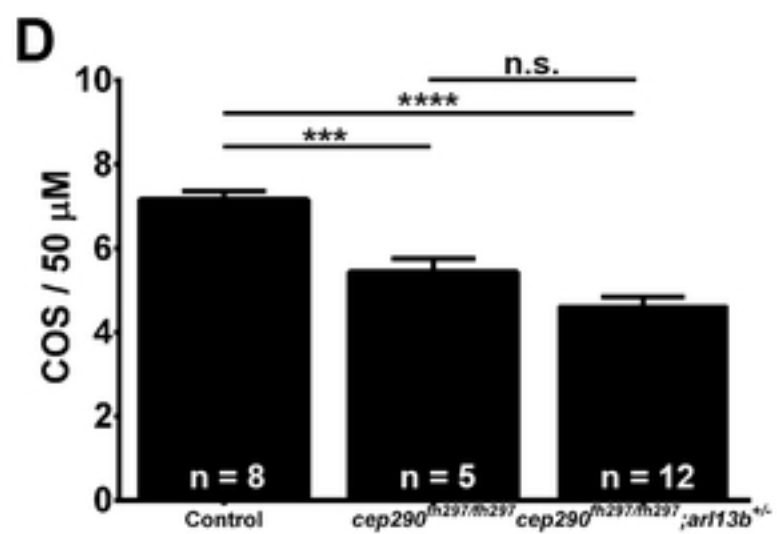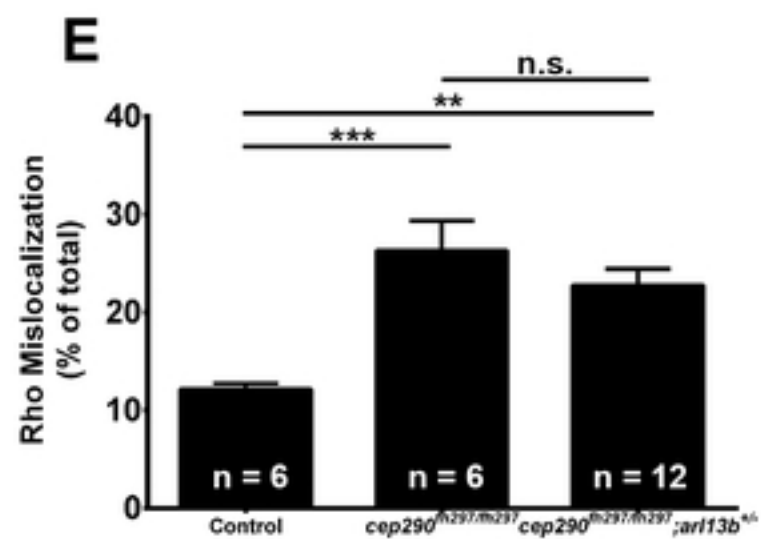

Figure 13

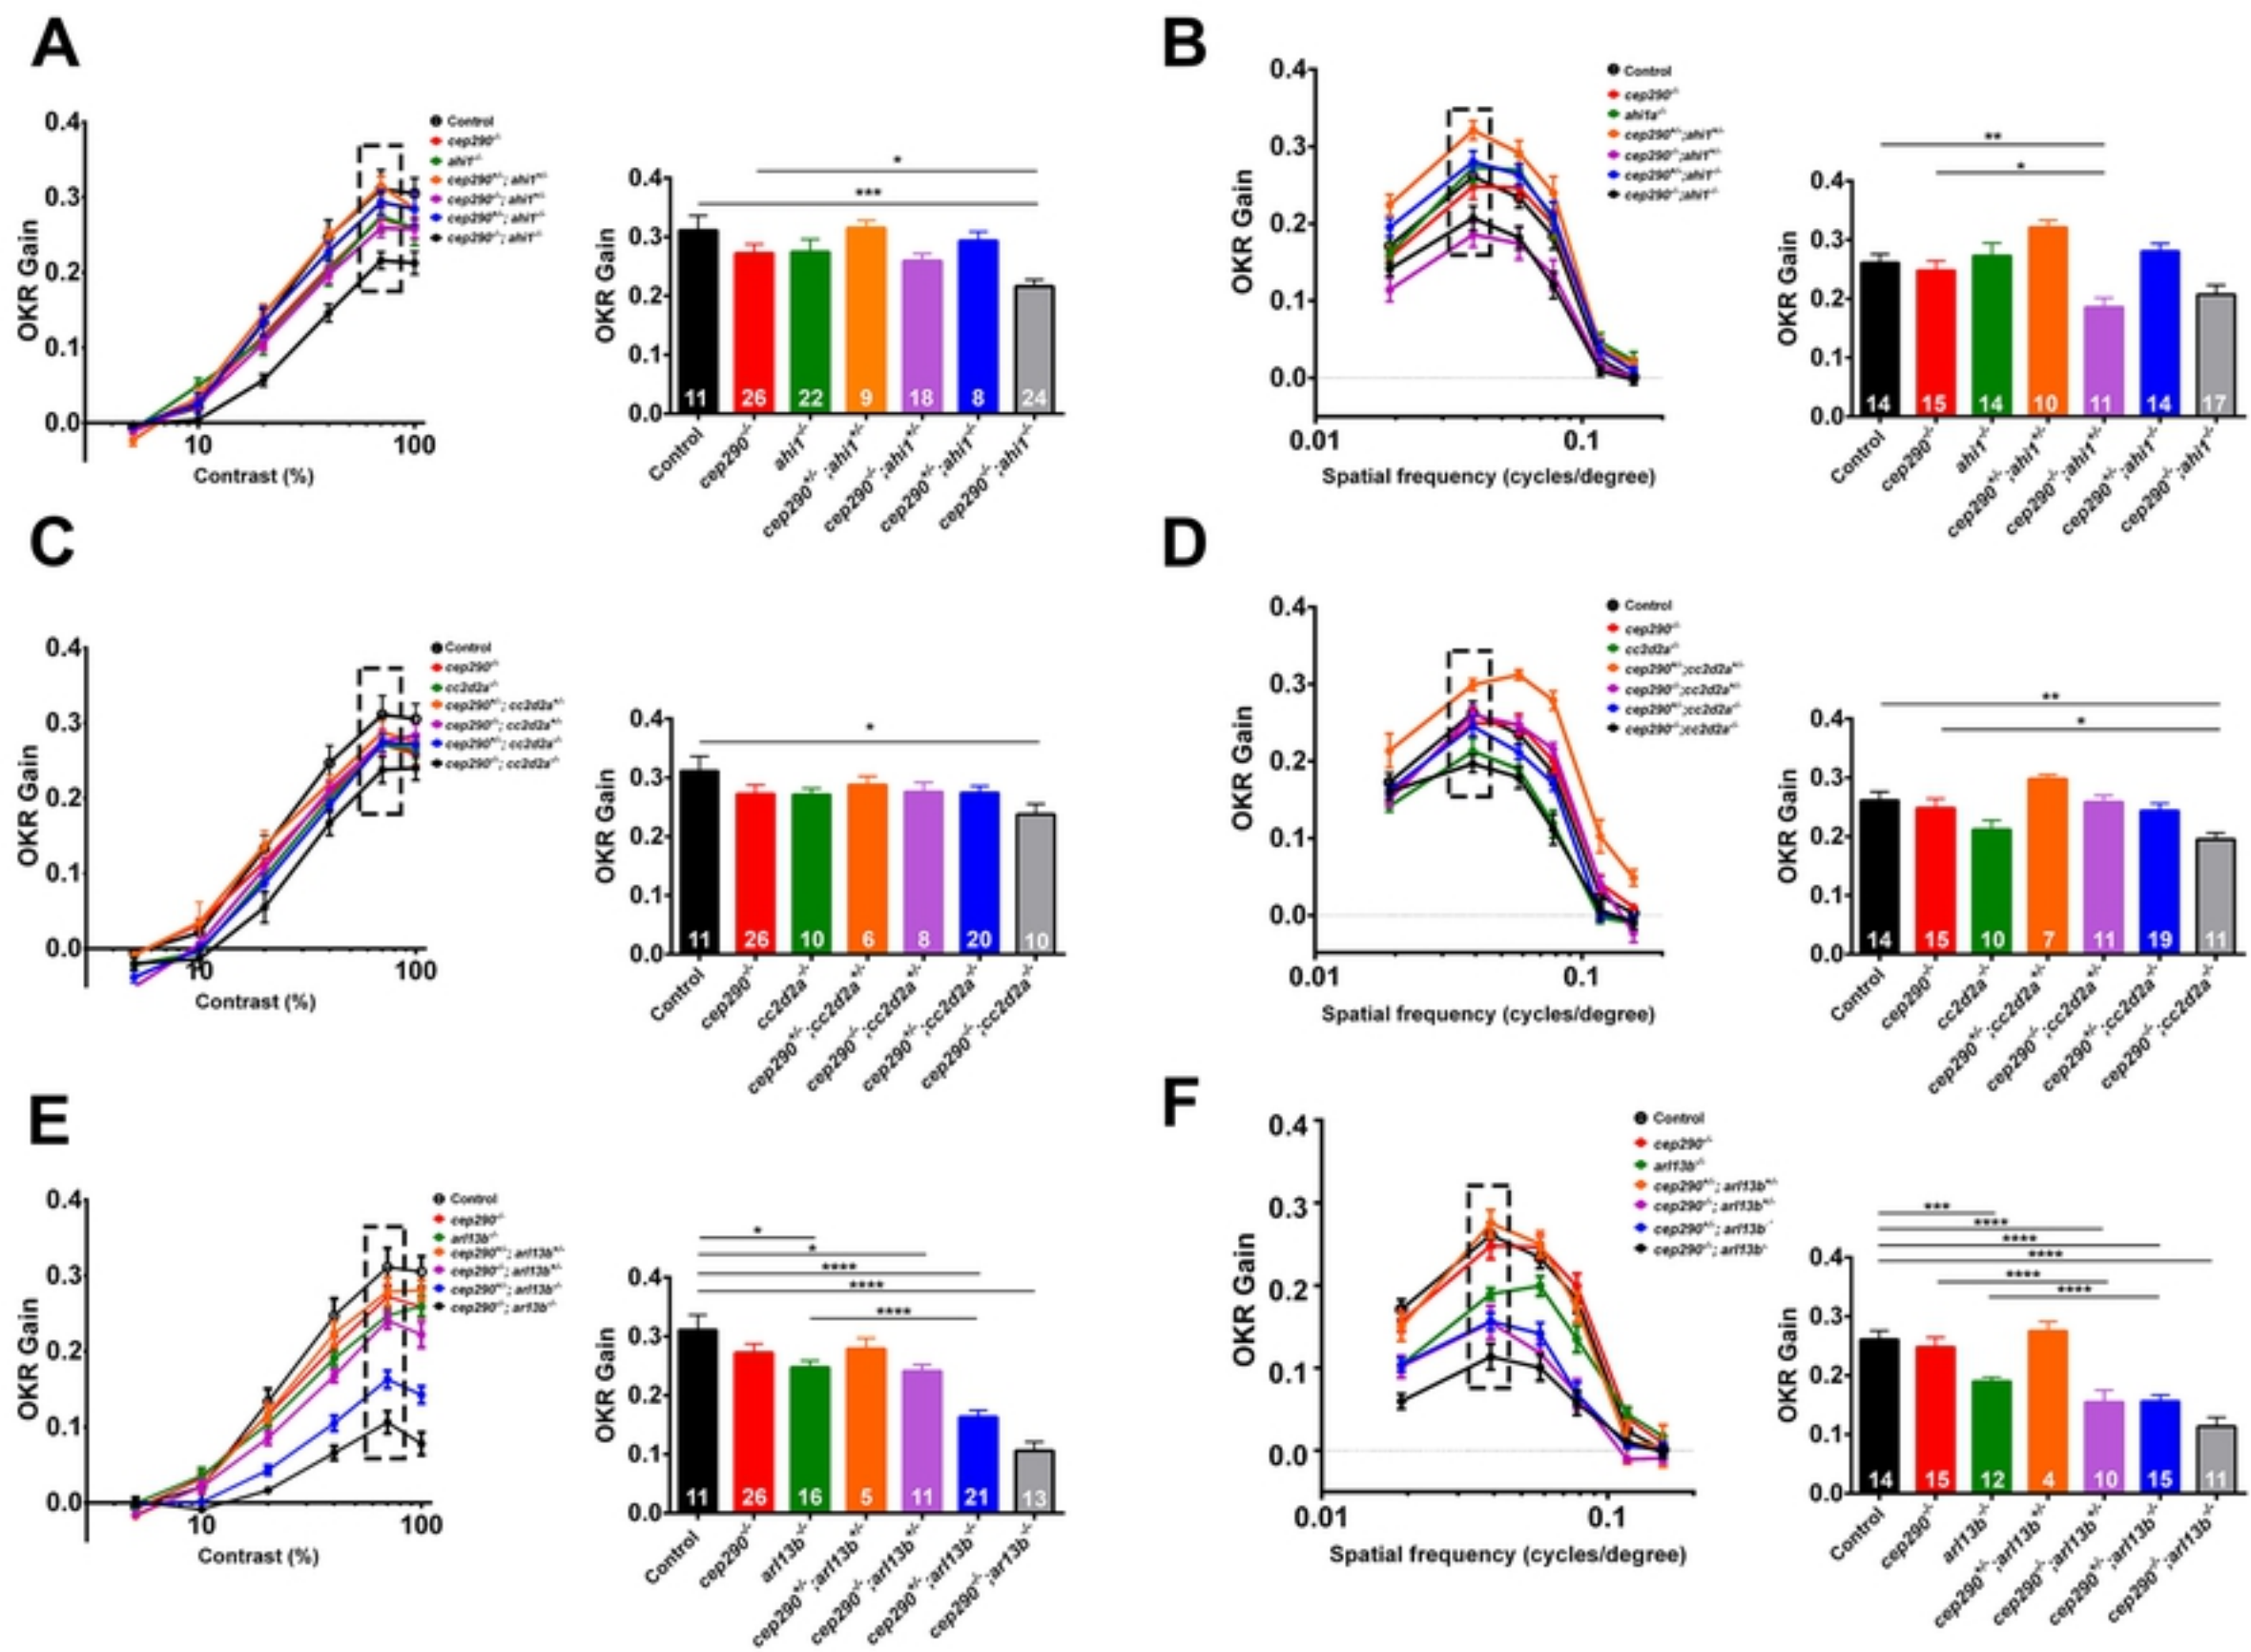

Figure 14
